# Supplementary material for: Does low-energy sweetener consumption affect energy intake and body weight? A systematic review, including meta-analyses, of the evidence from human and animal studies
Source: PubMed Central journal article supplement (PMC4786736; doi:10.1038/ijo.2015.177), 2015-11-10
Supplement: ijo2015177x1.pdf [file ijo2015177x1.pdf]

## Contents

|                                                                                                                                                          |    |
|----------------------------------------------------------------------------------------------------------------------------------------------------------|----|
| Definition of low-energy sweeteners (LES).....                                                                                                           | 4  |
| Medline search terms .....                                                                                                                               | 5  |
| Systematic review and meta-analysis methods.....                                                                                                         | 6  |
| Overall methods for the systematic review.....                                                                                                           | 6  |
| Data extraction methods for observational (prospective cohort) studies in humans.....                                                                    | 6  |
| Data extraction methods for short-term intervention studies in humans .....                                                                              | 6  |
| Summary of sustained intervention studies in humans .....                                                                                                | 7  |
| Meta-analysis methods – overview .....                                                                                                                   | 8  |
| Core meta-analysis methods .....                                                                                                                         | 8  |
| Specific methods for the observational (prospective cohort) studies.....                                                                                 | 9  |
| Specific methods for the short-term intervention studies .....                                                                                           | 10 |
| Specific methods for the sustained-intervention studies.....                                                                                             | 11 |
| Table S1. Characteristics and results of animal studies with compulsory consumption of LES and information on the effects of LES on BW.....              | 12 |
| Table S2. Characteristics and results of animal studies with voluntary consumption of LES and information on the effects of LES on BW.....               | 25 |
| Table S3. Characteristics and results of animal learning studies on the effects of LES on EI and BW .....                                                | 32 |
| Table S4. Characteristics of prospective cohort studies reporting information on association between LES consumption and body weight status change ..... | 42 |
| Table S5. Summary of meta-analysis fixed effect results for the various types of human studies .....                                                     | 54 |
| Table S6. Summary of results of Egger’s regression test for funnel plot asymmetry for the various types of human studies .....                           | 55 |
| Table S7. Characteristics and results of short-term intervention studies comparing the effects on EI of LES versus sugar .....                           | 56 |
| Table S8. Characteristics and results of short-term intervention studies comparing the effects on EI of LES versus unsweetened products .....            | 84 |
| Table S9. Characteristics and results of short-term intervention studies comparing the effects on EI of LES versus water .....                           | 89 |

|                                                                                                                                                                                   |     |
|-----------------------------------------------------------------------------------------------------------------------------------------------------------------------------------|-----|
| Table S10. Characteristics and results of short-term intervention studies comparing the effects on EI of LES versus nothing .....                                                 | 100 |
| Table S11. Characteristics and results of short-term intervention studies comparing the effects on EI of LES in capsules versus placebo capsules.....                             | 101 |
| Tables S12. Results of meta-regression analyses for the short-term intervention studies.....                                                                                      | 104 |
| Sensitivity analyses for short-term intervention studies.....                                                                                                                     | 109 |
| Table S13. Summary of sensitivity analyses for short-term intervention studies .....                                                                                              | 110 |
| Table S14. Characteristics and results of sustained intervention studies comparing the effects on EI and/or anthropometric measures of LES versus sugar and LES versus water..... | 112 |
| Table S15. Results of meta-regression analyses for the sustained intervention studies .....                                                                                       | 120 |
| Table S16. Summary of sensitivity analyses for sustained intervention studies .....                                                                                               | 121 |
| Table S17. Summary of risk of bias assessments for the sustained intervention studies .....                                                                                       | 122 |
| Table S18. Summary of methodological quality assessment for sustained intervention studies .....                                                                                  | 123 |
| Comparison of the present review with Miller and Perez <sup>(144)</sup> .....                                                                                                     | 124 |
| Table S19. Prospective cohort studies that differed in inclusion/exclusion between the present review and the review by Miller and Perez <sup>(144)</sup> .....                   | 124 |
| Table S20. Sustained intervention studies that differed in inclusion/exclusion between the present review and the review by Miller and Perez <sup>(144)</sup> .....               | 125 |
| Figure S1. Funnel plot of prospective cohort studies reporting information on association between LES consumption and body weight status change. ....                             | 126 |
| Figure S2. Forest plot of short-term intervention studies comparing the effects on EI of LES versus sugar in children and in adults.....                                          | 127 |
| Figure S3. Forest plot of short-term intervention studies comparing the effects on COMPX of LES versus sugar in children and in adults.....                                       | 129 |
| Figure S4. Forest plot of short-term intervention studies comparing the effects on EI of LES-sweetened versus unsweetened products.....                                           | 131 |
| Figure S5. Forest plot of short-term intervention studies comparing the effects on EI of LES versus water. ....                                                                   | 132 |
| Figure S6. Forest plot of short-term intervention studies comparing the effects on EI of LES versus nothing .....                                                                 | 133 |
| Figure S7. Forest plot of short-term intervention studies comparing the effects on EI of LES in capsules versus placebo capsules.....                                             | 134 |
| Figure S8. Funnel plots of short-term intervention studies comparing the effects on EI of LES versus sugar (for adults and children separately).....                              | 135 |

Figure S9. Funnel plots of sustained intervention studies comparing the effects on BW of LES versus sugar and LES versus water..... 136

Reference List..... 137

**Definition of low-energy sweeteners (LES)**

We defined LES as sweeteners and sweetener systems that contribute negligible energy to the product (i.e., typically <15% of the 'standard' or control caloric sweetener system, in most cases sucrose<sup>(1)</sup>). Clearly included were products where sweetness is predominantly derived from intense and non-caloric sweeteners (e.g., saccharin, aspartame, cyclamate, sucralose, acesulfame-K, stevia, erythritol) as direct replacements for sugars. We did not separately assess or compare effects of these different specific sweeteners, as they represent a diversity of molecular structures and there is limited hypothetical basis and empirical evidence to make such comparisons. Excluded were products using fructose or other caloric sugars or sweetener systems (e.g., intense sweeteners together with maltodextrins or sugars) in place of sucrose to achieve more limited reduction in energy content.

### Medline search terms

1. Body Weight/ or Energy Intake/ or Energy *Metabolism*/ or Obesity/
2. (weight and (control or gain\$ or los\$ or change\$ or increas\$ or reduc\$)).ti,ab.
3. (body adj1 (weight or fat or composit\$)).ti,ab.
4. Adipo\$.ti,ab.
5. BMI.ti,ab.
6. waist circumferenc\$.ti,ab.
7. lean body mass.ti,ab.
8. percentage body fat.ti,ab.
9. corpulen\$.ti,ab.
10. fat.ti,ab.
11. obes\$.ti,ab.
12. overweight.ti,ab.
13. over weight.ti,ab.
14. slim\$.ti,ab.
15. (weight adj6 (cyc\$ or reduc\$ or los\$ or maint\$ or decreas\$ or watch\$ or control\$ or gain\$ or chang\$)).ti,ab.
16. waist-hip ratio.ti,ab.
17. exp abdominal fat/
18. ((food or energy or calor\$) and intake\$).ti,ab.
19. 1 or 2 or 3 or 4 or 5 or 6 or 7 or 8 or 9 or 10 or 11 or 12 or 13 or 14 or 15 or 16 or 17 or 18
20. \*Saccharin/
21. cyclamat\$.ti,ab.
22. acesulfame-k.ti,ab.
23. stevia.ti,ab.
24. (sugar adj1 replacer).ti,ab.
25. \*Sweetening Agents/
26. erythritol.ti,ab.
27. ((sugar-free or sugar free or reduced-sugar\$) and (product\$ or food\$ or beverag\$ or drink\$)).ti,ab.
28. ((artificial\$ or intens\$ or high-intens\$ or non-calori\$ or reduced- or reduc\$ or low-energ\$ or low-calori\$) and sweetener\$).ti,ab.
29. aspartame\$.ti,ab.
30. sucralos\$.ti,ab.
31. 20 or 21 or 22 or 23 or 24 or 25 or 26 or 27 or 28 or 29 or 30
32. 19 and 31

## **Systematic review and meta-analysis methods**

### Overall methods for the systematic review

We excluded duplicates and obviously irrelevant articles on the basis of the article title or abstract, and allocated the remaining articles to subgroups of studies for review. Articles were included or excluded based initially on review of the abstract and then, where required review of the full report. Additional articles were identified by searching the references lists of reviews and included articles. We performed meta-analyses of the observational and the short-term and sustained intervention studies. Details of the processing of the data for each subgroup of studies are given in the relevant study selection and data extraction sections in the main text and below. In those sections we refer to 'articles' (i.e., a published paper), each of which included one or more separate 'studies' (i.e., experiments) or 'comparisons' (e.g., LES versus sugar, or LES versus water).

### Data extraction methods for observational (prospective cohort) studies in humans

Data from all of the eligible studies were extracted and agreed by two co-authors, and tabulated by date of publication. We recorded the size of the study as the number of participants included in the analysis and we also documented the number of participants enrolled in the study. Where various outcomes were reported we preferred reports of change in anthropometric outcome and those reported over the longest follow up period. Results of the fully adjusted model are reported, and where adjustment made a marked difference we note this. We considered age, gender, baseline anthropometric data, dieting behavior and social position to be key potential confounders. If possible, multiple adjusted models that did not adjust for EI were selected, as this is likely to be the primary mediator of any association between LES consumption and the anthropometric outcomes.

### Data extraction methods for short-term intervention studies in humans

Data extraction was undertaken by three co-authors according to a mutually agreed final protocol based on comparison and resolution of individual extracted data from ten randomly selected articles in the list. Data were extracted for test meal EI after the LES preload and comparison preload(s), and for energy content of the preloads (see below). We also noted the preload to test meal interval, and the number of participants and their gender, and where available their age, weight and/or BMI, dieting and/or dietary

restraint status. Where results were reported for subgroups within the same article (gender, weight status, preload amount, preload to test meal interval) we extracted the data separately for these subgroups. We extracted the data on the amount eaten on the first eating occasion (test meal) after the first preload, except in 4 studies (Van Wymelbeke et al.<sup>(2)</sup>; Appelton & Blundell<sup>(3)</sup>; Beridot-Therond et al.<sup>(4)</sup>; Lavin et al.<sup>(5)</sup>) in which beverage preloads were served between meals throughout the day. In these instances we included the data for total preload and total test meal intake. We also included studies in which the preload was consumed with the test meal.

### Summary of sustained intervention studies in humans

Data extraction was undertaken and agreed by two co-authors. We identified 13 studies (15 comparisons) meeting the inclusion criteria (Blackburn et al.<sup>(6)</sup>; de Ruyter et al.<sup>(7)</sup>; Kandlers et al.<sup>(8)</sup>; Maersk et al.<sup>(9)</sup> Naismith & Rhodes<sup>(10)</sup>; Njike et al.<sup>(11)</sup>; Peters et al.<sup>(12)</sup>; Raben et al.<sup>(13)</sup> Reid et al.<sup>(14)</sup>; Reid et al.<sup>(15)</sup> Tate et al.<sup>(16)</sup>; Tordoff and Alleva<sup>(17)</sup>; Wolraich et al.<sup>(18)</sup>, reporting EI data for 10 comparisons and anthropometric (weight) data for 14 comparisons. In the majority of studies a clear comparison was made between LES- and sugar-sweetened test products, which were provided to participants by the investigators (de Ruyter et al.<sup>(7)</sup>; Maersk et al.<sup>(9)</sup>; Naismith & Rhodes<sup>(10)</sup>; Njike et al.<sup>(11)</sup>; Raben et al.<sup>(13)</sup>; Reid et al.<sup>(14)</sup>; Reid et al.<sup>(15)</sup>; Tordoff & Alleva<sup>(17)</sup>; Wolraich et al.<sup>(18)</sup>). Maersk et al.<sup>(9)</sup> additionally had a water intervention group, while Peters et al.<sup>(12)</sup> compared groups instructed to consume either LES beverages or water. In these comparisons of LES with water, blinding of participants was clearly not possible. Furthermore, Blackburn et al.<sup>(6)</sup> and Kandlers et al.<sup>(8)</sup> compared participants advised to use or discouraged from using commercially available LES products during weight control programs. Tate et al.<sup>(16)</sup> placed regular consumers of sugar-sweetened beverages in treatment groups provided with either LES beverages or water, or maintaining their own choice of beverage. Participants in all other LES vs sugar comparisons were not informed of (i.e., blinded to) these treatments, with the exception of the 2 studies from Reid et al.<sup>(14,15)</sup> where half the participants were correctly informed and half deliberately misinformed. The misinformed subjects from Reid et al.<sup>(14)</sup>, were excluded from the meta-analysis of body weight, but could not be excluded from a smaller study by this group<sup>(15)</sup>, where the (mis)information had 'no effect on the results' and was not included or reported in the original paper. Additional treatment arms with dissimilar products (low fat milk in Maersk et al.<sup>(9)</sup> a placebo beverage in Njike et al.<sup>(11)</sup>) or no intervention (in Tordoff & Alleva<sup>(17)</sup>) were disregarded, as were data from

Rogers et al. Low energy sweeteners systematic review. Supplemental Information.

Experiment 1 (n=6) in Naismith & Rhodes<sup>(10)</sup>, which did not use a counter-balanced treatment order. Final rather than interim EI and BW values were extracted wherever possible.

### Meta-analysis methods – overview

The same core method was used in the meta-analyses of the observational, short-term and sustained intervention studies. The methods relating to further specific secondary analyses and sensitivity analyses relevant to the observational, short-term and sustained intervention studies are detailed after the core methods.

### Core meta-analysis methods

#### *Estimation of missing values for the accuracy of estimation of the study-level effect sizes*

For the meta-analyses, along with the effect size estimates, we extracted the associated standard deviations (SDs). Where SDs for the effect sizes were not reported, these were imputed using the following methods:

- 1) For studies which reported appropriate test statistics (e.g. t values from t-tests) we derived the missing SDs. If studies only reported *P* values we estimated the appropriate test statistics using available conversion tables and then estimated SDs as previously described.
- 2) For studies which reported only the SDs for the comparison arms (i.e. SDs for pre and post intervention measures in the short-term interventions, or SDs for control and intervention arms in the sustained interventions) we estimated correlation coefficients using the equation described by Higgins & Green<sup>(19)</sup> and data from studies which reported SDs for both the effect size and the comparison arms of the study. Missing effect size SDs were then imputed using the mean of these correlation coefficients and the reported SDs for the comparison arms.
- 3) For studies which did not report any SDs we assumed the SDs were equal to the largest SD from those studies which did report effect size SDs. This method can potentially bias results towards a lack of effect<sup>(19)</sup>, and therefore sensitivity analyses were carried out using less conservative estimates of the missing SDs and excluding those studies with missing SDs.



### *Sensitivity analyses*

In order to determine the effect of imputing missing SDs on the summary effect size estimates we repeated the analyses with two modifications and compared these results with the main analyses. Firstly, instead of replacing missing SDs with the largest reported SDs we used the mean of the reported SDs. Secondly, studies which did not report any SDs were excluded from the analyses.

### *Statistical methods*

#### Specific methods for the observational (prospective cohort) studies

If possible, multiple adjusted models that did not adjust for energy intake were selected. Fowler, Pan et al.<sup>(20,21)</sup> and Striegel-Moore et al.<sup>(22)</sup> did not adjust for energy intake. Berkey et al.<sup>(23)</sup> and Laska et al.<sup>(24)</sup> reported change in BMI both unadjusted and adjusted for energy intake, we have included the unadjusted results. Chen et al.<sup>(25)</sup> Duffey et al.<sup>(26)</sup> Ludwig et al.<sup>(27)</sup> Nettleton et al.<sup>(28)</sup> and Vanselow et al.<sup>(29)</sup> only included results adjusted for energy intake.

We excluded Ludwig et al.<sup>(27)</sup> from the meta-analyses since they did not report regression coefficients or confidence intervals related to change in BMI or body weight. While they did report odds ratios for obesity incidence, no other studies reported this outcome measure. Nettleton et al.<sup>(28)</sup> and Duffey et al.<sup>(26)</sup> reported hazard ratios for high waist circumference, which is too few studies to conduct a reliable separate meta-analysis.

The main meta-analysis of observational studies involved a comparison of change in BMI with change in LES consumption. Since the follow-up time differed between studies we standardised the effect sizes and their associated standard errors to 'change per year' by dividing the effect sizes and standard errors by follow-up time (in years). Chen et al.<sup>(25)</sup> and Pan et al.<sup>(21)</sup> reported change in body weight, whereas Berkey et al.<sup>(23)</sup>, Striegel-Moore et al.<sup>(22)</sup>, Fowler et al.<sup>(20)</sup>, Vanselow et al.<sup>(29)</sup> and Laska et al.<sup>(24)</sup> reported change in BMI. Therefore, change in body weight was converted into change in BMI using the mean reported height at baseline from each study. Where necessary<sup>(22)</sup>, we converted the scale used to describe consumption of diet beverages from 100 g per day to one serving per day, assuming 355 g per serving. Fowler et al.<sup>(20)</sup> compared LES beverage consumers with non-consumers. We converted the median LES consumption of consumers (2.3 servings/day) into one serving per day by dividing the effect

size estimate by the median LES consumption, assuming a linear relationship between change in LES beverage consumption and change in BMI. Where possible we included effect size estimates for males and females separately and, in the case of Pan et al.<sup>(20)</sup>, we included the effect sizes of the three study populations as separate comparisons. A random-effects model was used to calculate summary estimates, accounting for between-study heterogeneity. Considering the expected heterogeneity between the child and adult studies, analysis was stratified by study age group (adult or child).

Due to the low number of studies we did not explore factors which might explain the between-study heterogeneity with meta-regression models.

### Specific methods for the short-term intervention studies

The SDs of the energy content of the LES and comparison preloads were assumed to equal zero. This assumption enabled us to calculate the cumulative energy intake and COMPX scores.

Many of the short-intervention studies reported multiple results for the same participants within the same comparison (e.g., LES versus different sugars: fructose 80% and glucose 20%, high fructose corn syrup, sucrose, glucose 80% and fructose 20%<sup>(30)</sup>). Due to the potential for correlation between these repeated measures, treating the effect size estimates as independent would result in an overestimate of the total population included in the meta-analyses and potentially biased estimates of the variance of the summary effect sizes. For the main analyses the first set of results from each study were used. In the sensitivity analyses we applied robust variance estimation methods<sup>(32)</sup> using the 'robumeta' package<sup>(32)</sup> to incorporate independent and repeated measures in the calculations of the summary effect sizes and meta-regression coefficients. Repeated measures were assumed to be correlated rather than hierarchical, and the default value for the within-study effect size correlation of  $\rho=0.8$  was used.

The study-design variables considered in the meta-regression were year of publication, gender of participants (male, female or mixed), interval between consumption of the preload and consumption of the test meal (0 mins, <30 mins, 30-60 mins or >60 mins) and the energy content of the comparison preload. Meta-regression models were simultaneously adjusted for all independent variables.

### Specific methods for the sustained-intervention studies

A meta-analysis was carried out on BW data, using studies with a minimum exposure of 4 weeks. Two studies meeting the inclusion criteria for the review<sup>(10,17)</sup> had an exposure duration of <4 weeks and are therefore noted in the narrative text and tables but excluded from the meta-analysis.

Two studies<sup>(16,9)</sup> were multi-armed interventions where a LES trial arm was compared to both a sugar and a water intervention arm, and a third study only compared LES beverages to water. Two separate meta-analyses were therefore undertaken, depending on the control group. The control group in the main meta-analysis was the trial arm consuming sugar-sweetened products. In the secondary meta-analysis the control group was the water consumption trial arm. A random-effects model was used to calculate summary estimates, accounting for between-study heterogeneity. Considering the expected heterogeneity between the child and adult studies, analysis was undertaken for each age group separately (adult or child) and together. Meta-regression models were simultaneously adjusted for all independent variables.

**Table S1. Characteristics and results of animal studies with compulsory consumption of LES and information on the effects of LES on BW**

| Reference                         | Species tested              | Design                                                                                 | Sample size per condition | Type LES                                             | Dietary manipulation                                                                | Experimental conditions                                  | Measures                                        | Outcome                                                                                   |
|-----------------------------------|-----------------------------|----------------------------------------------------------------------------------------|---------------------------|------------------------------------------------------|-------------------------------------------------------------------------------------|----------------------------------------------------------|-------------------------------------------------|-------------------------------------------------------------------------------------------|
| Dalderup & Visser <sup>(33)</sup> | Albino rats                 | LES vs different nutrients vs control                                                  | 17                        | Sodium cyclamate                                     | 4.26mg/g cyclamate in place of sugar in powdered diet vs 5 control nutrients, 6 wks | 1. control<br>2-5. added nutrients<br>6. added cyclamate | Total food intake<br><br>BW change (over 6 wks) | Sign. increase in BW relative for added cyclamate                                         |
| Dalderup & Visser <sup>(34)</sup> | Albino rats                 | Cyclamate in place of sugar in powdered diet relative to different nutrients for 6 wks | 17                        | Sodium cyclamate                                     | 4.26mg/g cyclamate in powdered diet versus 5 controls                               | 1. control<br>2-5 added nutrients<br>6 added cyclamate   | Max. BW                                         | No sign. difference in BW between cyclamate and control: higher than those with sugar     |
| Friedhoff <sup>(35)</sup>         | Mice (strain not specified) | 2% LES solution vs 13% sucrose solution vs water                                       | 10                        | 2% sweetener solution (6% cyclamate, 0.6% saccharin) | LES solution as sole fluid source, 23 d                                             |                                                          | BW (measured 3 times/wk)                        | No group differences in BW                                                                |
| Brantom et al. <sup>(36)</sup>    | ASH-CS1 mice                | Chronic feeding of 4 doses of LES vs control                                           | 30                        | 0.7, 1.75, 3-5 or 7.0 % sodium cyclamate             | Daily dose of LES, 80 wks                                                           |                                                          | BW                                              | 52 wks: no differences among groups<br>52-80 wks: BW loss for female mice with some doses |

| Reference                      | Species tested                             | Design                                                                | Sample size per condition | Type LES                                                                  | Dietary manipulation                                                             | Experimental conditions | Measures                             | Outcome                                                                                                                                 |
|--------------------------------|--------------------------------------------|-----------------------------------------------------------------------|---------------------------|---------------------------------------------------------------------------|----------------------------------------------------------------------------------|-------------------------|--------------------------------------|-----------------------------------------------------------------------------------------------------------------------------------------|
| Munro et al. <sup>(37)</sup>   | Male and female Charles River rats         | Between groups: dose-dependent saccharin vs control                   | 120                       | 0, 90, 270, 810, or 2430 mg saccharin/kg /d                               | Different concentrations of saccharin added to diet, 26 months                   | Group housed animals    | BW<br>food intake                    | No effects on food intake<br>Highest doses caused weight loss                                                                           |
| Oser et al. <sup>(38)</sup>    | Male and female rats (no strain specified) | Between groups: dose-dependent cyclamate/saccharin mixture vs control | 160                       | 0, 500, 1120, and 2500 mg/kg cyclamate/saccharin mixture in ratio of 10:1 | Different concentrations of cyclamate/saccharin mixture added to diet, 24 months | Group housed animals    | BW<br>food intake                    | No sign. changes in food intake or BW                                                                                                   |
| Andersen <sup>(39)</sup>       | Weanling male Charles River rats           | Between groups: LES vs control                                        | 10                        | 0, 1, 3, 5 and 7.5% sodium saccharin                                      | LES (0, 1, 3, 5 and 7.5%) added to normal diet                                   | Group housed animals    | BW<br>food intake<br>recorded weekly | Sign. linear decrease in BW gain with increasing saccharin dose                                                                         |
| Watkins et al. <sup>(40)</sup> | Sprague-Dawley rats, male                  | Between groups, LES vs control using different diets                  | 5                         | Sodium saccharin                                                          | Saccharin added to diets enriched with safflower oil or beef tallow              | Housed individually     | BW<br>food intake                    | Lower BW gain with oil-enriched diet + saccharin vs oil-enriched diet<br>Higher BW on diet with beef tallow + saccharin vs tallow alone |

| Reference                           | Species tested                     | Design                                             | Sample size per condition                       | Type LES                                                                      | Dietary manipulation                                  | Experimental conditions                                                               | Measures                             | Outcome                                                                                                                                                                                 |
|-------------------------------------|------------------------------------|----------------------------------------------------|-------------------------------------------------|-------------------------------------------------------------------------------|-------------------------------------------------------|---------------------------------------------------------------------------------------|--------------------------------------|-----------------------------------------------------------------------------------------------------------------------------------------------------------------------------------------|
| Ishii et al. <sup>(41)</sup>        | Wistar rats                        | Between groups: 4 conditions LES vs control        | 86                                              | 0, 1, 2, and 4 mg/kg aspartame, or 4mg/kg aspartame + 1mg/kg DKP              | Different concentrations of LES added to diet         | Group-housed rats assigned to control, 3 doses of aspartame or combined aspartame/DKP | BW<br>food intake<br>recorded weekly | Slower BW gain after 2 and 4 mg/kg aspartame, and 4mg aspartame + DKP<br><br>Reduced food intake in all aspartame treatments                                                            |
| Higginbotham et al. <sup>(42)</sup> | Sprague Dawley CD rats             | Between groups: 3-doses of thaumatin vs control    | 5                                               | 0, 0.3, 1 and 3% added thaumatin                                              | Different concentrations of LES added to diet, 13 wks | Group housed animals consuming diets with LES <i>ad libitum</i>                       | BW<br>food intake (daily)            | Higher BW male rats fed 3% thaumatin at 4 wks but not other wks<br><br>Lower BW female rats fed 1% thaumatin at 10 and 13 wks<br><br>Food intake “similar” in all groups (not reported) |
| Schoening et al. <sup>(43)</sup>    | Male and female Charles River rats | Between groups dose-dependent saccharin vs control | 980 M/1960 F, 10 groups, group min. 52 M, 104 F | 0, 1, 3, 4, 5, 6.25, or 7.5 % sodium saccharin, or 5% in diet after gestation | Different concentrations of saccharin added to diet   | Group housed animals                                                                  | BW<br>food intake                    | Dose-dependent reduction in BW with saccharin                                                                                                                                           |
| Fisher et al. <sup>(44)</sup>       | F344 rats                          | LES vs calcium added to diet                       | 10                                              | 5% calcium or sodium saccharin                                                | LES added to normal diet, 10 w                        | 6 conditions (2 diets x 3 sweeteners)                                                 | BW<br>food intake                    | Decreased BW gain in both groups fed saccharin<br><br>higher intake with one diet with added saccharin                                                                                  |

| Reference                   | Species tested              | Design                                              | Sample size per condition | Type LES                                      | Dietary manipulation                                          | Experimental conditions                                               | Measures                             | Outcome                                                                                    |
|-----------------------------|-----------------------------|-----------------------------------------------------|---------------------------|-----------------------------------------------|---------------------------------------------------------------|-----------------------------------------------------------------------|--------------------------------------|--------------------------------------------------------------------------------------------|
| Lina et al. <sup>(45)</sup> | Male and female Wistar rats | Between groups: dose-dependent LES vs control       | 40                        | 0, 0.2, 1 or 5% neohesperidin dihydrochalcone | Different concentrations of neohesperidin added to diet, 91 d | Group housed animals consuming diets with added LES <i>ad libitum</i> | BW<br>food intake<br>recorded weekly | Highest dose caused sign. reduction in BW                                                  |
| Xili et al. <sup>(46)</sup> | Male and female Wistar rats | -groups, dose-dependent effects of stevioside       | 45                        | 0, 0.2, 0.6 and 1.2% stevioside               | Different concentrations of stevioside added to diet, 2 years | Group housed rats                                                     | BW                                   | No sign. differences                                                                       |
| Lina et al. <sup>(47)</sup> | Male and female Wistar rats | Between groups dose-dependent erythritol vs control | 100                       | 0, 2, 5 and 10% erythritol                    | Different concentrations of LES, 52 wks                       | Group housed animals consuming diets with LES <i>ad libitum</i>       | BW<br>group food intake              | Sign. reduced BW with 10% added erythritol<br><br>clear trend for dose-dependent reduction |

| Reference                              | Species tested                                                         | Design                                               | Sample size per condition            | Type LES                    | Dietary manipulation                                                                                                                                 | Experimental conditions                                             | Measures                  | Outcome                                                                                                                                                                                  |
|----------------------------------------|------------------------------------------------------------------------|------------------------------------------------------|--------------------------------------|-----------------------------|------------------------------------------------------------------------------------------------------------------------------------------------------|---------------------------------------------------------------------|---------------------------|------------------------------------------------------------------------------------------------------------------------------------------------------------------------------------------|
| Til et al. <sup>(48)</sup><br>(Exp. 1) | Male and female Swiss CD-1 mice and Wistar CrI (WI) WU BR rats         | Between-groups, dose-dependent effects of erythritol | 10/group for mice, 15/group for rats | 0, 5, 10, or 20% erythritol | Different concentrations of LES added to diet, 90 d                                                                                                  | Group housed mice. Additional condition with 20% mannitol for rats. | BW                        | Sign. reduction in BW after 20% erythritol in mice and rats                                                                                                                              |
| Til et al. <sup>(49)</sup><br>(Exp. 2) | Male and female Wistar rats                                            | Between-groups, dose-dependent effects of erythritol | 10                                   | 0, 5, and 10% erythritol    | Different concentrations of LES added to diet in place of wheat starch, 4 wks                                                                        | Group housed rats                                                   | BW<br>food intake         | Reduced food intake and BW for male rats at 10% dose at start                                                                                                                            |
| Bailey et al. <sup>(50)</sup>          | Homozygous lean (+/+) and obese-hyperglycaemic (ob/ob) mice, 5 wks old | Between groups: LES vs control                       | 5                                    | Sodium saccharine           | 1. Main study <i>Ad libitum</i> access to 5% saccharin in water (vs normal water), 7 wks<br><br>2. Suppl. study as main study, but with 1% saccharin | Group housed animals                                                | BW<br>food intake (daily) | Lean mice: No sign. effect of 5% saccharin on BW or food intake<br><br>Obese mice: Reduced food intake and 18% reduction in BW, reversed by 4-wk washout<br><br>No sign. effects 1% diet |



| Reference                                 | Species tested                                | Design                                       | Sample size per condition | Type LES                                 | Dietary manipulation                                                              | Experimental conditions                                               | Measures                             | Outcome                                                                                                                               |
|-------------------------------------------|-----------------------------------------------|----------------------------------------------|---------------------------|------------------------------------------|-----------------------------------------------------------------------------------|-----------------------------------------------------------------------|--------------------------------------|---------------------------------------------------------------------------------------------------------------------------------------|
| Goldsmith <sup>(51)</sup><br><br>(Exp. 1) | Sprague Dawley CD rats                        | Between groups: 3 doses sucralose vs control | 30                        | 0, 1.0, 2.5 and 5% added sucralose       | LES added to diet for 4-wk                                                        | Group housed animals consuming diets with sucralose <i>ad libitum</i> | BW<br>food intake<br>recorded weekly | Reduced BW with 5% sucralose in both male and female rats and with 2.5% sucralose for male rats only<br><br>No effects on food intake |
| Goldsmith <sup>(51)</sup><br><br>(Exp. 2) | Sprague Dawley CD rats                        | Between groups: 3 doses sucralose vs control | 30                        | 0, 1.0, 2.5 and 5% added sucralose       | LES added to diet for 8-wk                                                        | Group housed animals consuming diets with sucralose <i>ad libitum</i> | BW<br>food intake<br>recorded weekly | Reduced BW with 5% sucralose<br>No effects on food intake                                                                             |
| Beck et al. <sup>(52)</sup>               | Male Long Evans rats                          | Between groups: aspartame vs control         | 12                        | Aspartame                                | Ad libitum access to 1% aspartame in drinking water or normal water for 14 weeks. | Group housed animals                                                  | BW<br>food intake (daily)            | Significantly slower growth in rats consuming aspartame                                                                               |
| Jeppesen et al. <sup>(53)</sup>           | Adult male type-2 diabetic GK and Wistar rats | Between groups stevioside vs control         | 20                        | 0.025g/kg/d stevioside in drinking water | <i>Ad libitum</i> access to LES in drinking water vs normal water, 6 wks          | Housing unclear                                                       | BW                                   | No sign. effects on BW                                                                                                                |

| Reference                                 | Species tested                    | Design                                                                  | Sample size per condition | Type LES                                                           | Dietary manipulation                                                               | Experimental conditions                                                                        | Measures                  | Outcome                                                       |
|-------------------------------------------|-----------------------------------|-------------------------------------------------------------------------|---------------------------|--------------------------------------------------------------------|------------------------------------------------------------------------------------|------------------------------------------------------------------------------------------------|---------------------------|---------------------------------------------------------------|
| Waalkens-Berendsen et al. <sup>(54)</sup> | Female Wistar CrI (WI)WU BR rats  | Between-groups, dose-dependent effects of neohesperidin dihydrochalcone | 28                        | 0, 1.25, 2.5 and 5% neohesperidin dihydrochalcone                  | Different concentrations of LES added to diet, 21 d                                | Group housed mated female rats                                                                 | BW                        | No sign. differences                                          |
| Jurgens et al. <sup>(55)</sup>            | NRMI mice, 3 months old           | Combined LES treatment vs control                                       | 8-9                       | Combined sweetener (sodium cyclamate, aspartame, sodium saccharin) | <i>Ad libitum</i> access to LES soft drink or drinking water as fluid source, 73 d | Individually housed mice                                                                       | BW<br>group food intake   | No sign. difference in BW gain                                |
| Dyrskog et al. <sup>(56)</sup>            | Obese ZDF rats                    | Stevioside in water vs control, combined with 2 diets                   | 12                        | 0.03g/kg stevioside                                                | Stevioside solution vs water, combined with normal or high protein diet            | 1. normal + water<br>2. normal + stevioside<br>3. high protein<br>4. high protein + stevioside | BW<br>food intake (daily) | No significant effect of stevioside on BW                     |
| Tago et al. <sup>(57)</sup>               | Male and female F344 Fischer rats | Between-groups, dose-dependent effects of oligo-N-acetylglucosamine     | 5                         | 0, 0.2, 1, and 5% oligo-N-acetylglucosamine                        | Different concentrations of LES added to diet, 90 d                                | Group housed animals                                                                           | BW<br>food intake         | No sign. differences in BW or intake between LES and controls |

| Reference                        | Species tested                      | Design                                                   | Sample size per condition                                      | Type LES                                                                                                            | Dietary manipulation                                | Experimental conditions                                         | Measures                                                | Outcome                                                                                                           |
|----------------------------------|-------------------------------------|----------------------------------------------------------|----------------------------------------------------------------|---------------------------------------------------------------------------------------------------------------------|-----------------------------------------------------|-----------------------------------------------------------------|---------------------------------------------------------|-------------------------------------------------------------------------------------------------------------------|
| Bergheim et al. <sup>(58)</sup>  | C57BL/J6 mice                       | LES in drinking water vs control                         | 4-6                                                            | Combination of cyclamate, Sunett, saccharin                                                                         | LES vs water, 8 wks                                 |                                                                 | BW<br>food intake (daily)                               | No sign. differences in food intake or BW                                                                         |
| Curry & Roberts <sup>(59)</sup>  | HsdRcc Han:Wist rats                | Chronic feeding of 4 doses of rebaudioside A vs control  | 10 male and 10 female, 4 wk study.<br>20M and 20 F 13 wk study | 4 wk study: 0, 25,000, 50,000, 75,000 and 100,000 ppm rebaudioside A<br>13-wk study: 12,500, 25,000, and 50,000 ppm | LES added to diet<br>4-wk study, 13-wk study        | 4-wk study: 1 control, 4 doses<br>13-wk study: control, 3 doses | BW<br>food intake                                       | 4-wk study: BW reduced by highest dose<br>13-wk study: dose-dependent reduction in BW gain<br>reduced food intake |
| Nikiforov et al. <sup>(60)</sup> | Male and female Sprague-Dawley rats | Between groups: dose-dependent rebaudioside A vs control | 160                                                            | 0, 500, 1000 or 2000 mg Rebaudioside A/kg/day                                                                       | Different concentrations of LES added to diet, 90 d | Individually housed animals                                     | BW (at least twice/wk)<br>Food intake (recorded weekly) | Reduced BW of male rats on highest dose (2000 mg)<br>No effects on food intake                                    |

| Reference                                | Species tested     | Design                                                                     | Sample size per condition | Type LES                          | Dietary manipulation                                              | Experimental conditions                                                 | Measures                           | Outcome                                                                                          |
|------------------------------------------|--------------------|----------------------------------------------------------------------------|---------------------------|-----------------------------------|-------------------------------------------------------------------|-------------------------------------------------------------------------|------------------------------------|--------------------------------------------------------------------------------------------------|
| Figlewicz et al. <sup>(61)</sup>         | Albino rats        | Sweetened liquids overnight, stevioside vs control                         | 10                        | 12.5% stevia                      | Sweetener as sole fluid source for 3 nights/wk                    | 6 conditions with different sweeteners, only stevia vs control relevant | BW<br>food intake                  | No significant effect of stevia on BW.                                                           |
| Yagi and Matsuo <sup>(62)</sup> (Exp. 1) | Male Wistar rats   | Between-groups, D-Psicose vs sucrose                                       | 18                        | 3% D-Psicose                      | D-Psicose or sucrose added to diet, 12 months                     | Group housed rats                                                       | BW<br>food intake                  | No differences between treatments                                                                |
| Yagi and Matsuo <sup>(62)</sup> (Exp. 2) | Male Wistar rats   | Between-groups, D-Psicose vs sucrose                                       | 10                        | 3% D-Psicose                      | D-Psicose or sucrose added to diet, 18 months                     | Group housed rats                                                       | BW<br>food intake                  | No differences between treatments                                                                |
| Park & Cha <sup>(63)</sup>               | Male C57BL/6J mice | Between groups: Stevia rebaudiana supplemented to high fat diet vs control | 40                        | Stevia rebaudiana Bertoni extract | Extract from Stevia rebaudiana Bertoni given orally daily, 15 wks | Not clear if housed individually or in groups                           | BW (weekly)<br>food intake (daily) | No sign. difference in food intake or BW between high fat with stevia and high fat control group |

| Reference                       | Species tested                | Design                                   | Sample size per condition | Type LES                                         | Dietary manipulation                                                                   | Experimental conditions           | Measures                                       | Outcome                                                                               |
|---------------------------------|-------------------------------|------------------------------------------|---------------------------|--------------------------------------------------|----------------------------------------------------------------------------------------|-----------------------------------|------------------------------------------------|---------------------------------------------------------------------------------------|
| Park et al. <sup>(64)</sup>     | Rat                           | Between groups: saccharin versus control | Not provided              | Saccharin (0.1%)                                 | <i>Ad libitum</i> access for 2h to saccharin alongside chow, 3 wks at postnatal day 22 | Group house animals               | BW<br>food intake (daily)<br>Saccharine intake | No sign. effects on BW                                                                |
| Geeraert et al. <sup>(65)</sup> | Mice, obese insulin-resistant | Stevioside vs control                    | Treatment 12, control 20  | 10mg/kg stevioside                               | Oral dosing, 12 w                                                                      | Oral dosing rather than ingestion | BW                                             | No effect of stevioside on BW                                                         |
| Andrejic et al. <sup>(66)</sup> | Wistar rats                   | Between groups: saccharin vs control     | 12                        | 0.0005% saccharin                                | <i>Ad libitum</i> access to saccharin in drinking water or normal water for 6 weeks    | Group housed animals              | BW<br>food intake (group data)                 | No significant effect of saccharin on BW                                              |
| Polyak et al. <sup>(67)</sup>   | CBA/CA mice, male and female  | Between groups                           | 12 (60 total)             | Saccharin, cyclamate, acesulfame -K or aspartame | <i>Ad libitum</i> access to one of 4 LES solutions or water                            | Group-housed animals              | BW (weekly)<br>food intake                     | BW gain in M+F for saccharin vs control<br>BW gain male mice for cyclamate vs control |

| Reference                                            | Species tested                     | Design                                                     | Sample size per condition | Type LES                                    | Dietary manipulation                                         | Experimental conditions                                       | Measures                             | Outcome                                                                                                               |
|------------------------------------------------------|------------------------------------|------------------------------------------------------------|---------------------------|---------------------------------------------|--------------------------------------------------------------|---------------------------------------------------------------|--------------------------------------|-----------------------------------------------------------------------------------------------------------------------|
| Hlywka et al. <sup>(68)</sup>                        | Sprague Dawley CD rats             | Between groups: 4 doses of monatin vs control              | 40                        | 0, 5000, 10000, 20000 and 35000 ppm monatin | Different concentrations of LES added to diet, 90 d          | Individually housed rats assigned to one of 5 diet conditions | BW<br>food intake<br>recorded weekly | Lower BW at end of trial after 35000ppm monatin, sign. in female rats only<br><br>No sign. differences in food intake |
| Otabe et al. <sup>(69)</sup>                         | Male and female Han-Wistar rats    | Between groups: dose-dependent advantame vs control        | 55                        | 0, 2000, 10000, and 20000 ppm advantame     | Different concentrations of advantame added to diet, 104 wks | Group housed animals                                          | BW<br>food intake                    | No sign. effects on food intake or BW                                                                                 |
| Otabe et al. <sup>(70)</sup>                         | Male and female Charles River rats | Between groups: dose-dependent advantame vs control        | 272                       | 0, 2000, 10000, and 20000 ppm advantame     | Different concentrations of advantame added to diet, 10 wks  | Individually housed animals                                   | BW<br>food intake                    | No sign. effects on food intake or BW                                                                                 |
| Reis et al. <sup>(71)</sup><br>(abstract in English) | Wistar rats                        | Between groups dose-dependent stevia vs control or sucrose | ??                        | 2, 4 or 6% added stevia or 4% sucrose       | Stevia added to diet, 45 d                                   | Group-housed rats                                             | BW<br>food intake                    | No difference in BW among conditions                                                                                  |

| Reference                         | Species tested                      | Design                                                         | Sample size per condition | Type LES                                                                       | Dietary manipulation                                                                              | Experimental conditions                                         | Measures                             | Outcome                                                                                                                  |
|-----------------------------------|-------------------------------------|----------------------------------------------------------------|---------------------------|--------------------------------------------------------------------------------|---------------------------------------------------------------------------------------------------|-----------------------------------------------------------------|--------------------------------------|--------------------------------------------------------------------------------------------------------------------------|
| Brathwaite et al. <sup>(72)</sup> | Pregnant Crl:CD(SD) rats            | Chronic feeding of 3 doses of LES vs control                   | 25                        | 0, 15000, 30000 or 50000 ppm monatin                                           | LES added to diet, 15 d                                                                           | Group housed animals consuming diets with LES <i>ad libitum</i> | BW<br>Food intake recorded daily     | Dose-dependent reduction in BW with added monatin                                                                        |
| Nikiforov et al. <sup>(73)</sup>  | Male and female Sprague-Dawley rats | Between groups: dose-dependent rebaudioside A and D vs control |                           | 0, 500, 1000 or 2000 mg/kg/day rebaudioside D or 2000 mg/kg/day rebaudioside A | Different concentrations of rebaudioside D or a single dose of rebaudioside A added to diet, 28 d | Individually housed animals                                     | BW<br>food intake<br>recorded weekly | No effects of rebaudioside A or D on BW                                                                                  |
| Mitsutomi et al. <sup>(74)</sup>  | Male C57Bl/6 mice                   | Between groups: LES vs water or sucrose                        | 5                         | Combination of erythritol (99%) and aspartame (1%)                             | High-fat diet with LES vs water as fluid source, 4 wks                                            | Group housed mice                                               | BW<br>food intake<br>recorded daily  | No difference in BW or food intake between sweetener and water<br><br>(enhanced BW but reduced food intake with sucrose) |

| Reference                         | Species tested       | Design                                                                   | Sample size per condition | Type LES                                              | Dietary manipulation                       | Experimental conditions                 | Measures                         | Outcome                                                                   |
|-----------------------------------|----------------------|--------------------------------------------------------------------------|---------------------------|-------------------------------------------------------|--------------------------------------------|-----------------------------------------|----------------------------------|---------------------------------------------------------------------------|
| Fulop et al. <sup>(75)</sup>      | White mice AKR2 line | Between groups LES versus control or "sugar": also sugar + LES condition | 160 females and 160 males | 80 mg/L sodium saccharin + 800 mg/L sodium cyclamate. | Ad libitum access to LES in drinking water | Group-housed for each condition and sex | Body weight over 52 weeks        | No significant effects on BW                                              |
| Abu-Taweel et al. <sup>(76)</sup> | Swiss-Webster mice   | Between groups LES or LES + MSG versus control                           | 10                        | Aspartame 32mg/kg                                     | Ad libitum access to LES in tap water      | Group housed                            | Body weight over 30 day exposure | Reduced growth with aspartame both alone and in combination with MSG      |
| Palmnas et al. <sup>(77)</sup>    | Sprague-Dawley rats  | Between groups Aspartame versus water either with normal or HF diet      | 10-12                     | Aspartame 60mg/l                                      | Ad libitum access to LES in tap water      | Group housed                            | Body weight over 8 weeks         | Reduced BW in rats on HF diet with ASP, no effect of ASP with normal diet |

LES, low energy sweetener; BW, body weight.



**Table S2. Characteristics and results of animal studies with voluntary consumption of LES and information on the effects of LES on BW**

| Reference                          | Species tested | Design         | Sample size per condition | Type LES                                                 | Dietary manipulation                                                                                                                                                                                                             | Experimental conditions                                                                                        | Measures | Outcome                                                                                                                                                                                                           |
|------------------------------------|----------------|----------------|---------------------------|----------------------------------------------------------|----------------------------------------------------------------------------------------------------------------------------------------------------------------------------------------------------------------------------------|----------------------------------------------------------------------------------------------------------------|----------|-------------------------------------------------------------------------------------------------------------------------------------------------------------------------------------------------------------------|
| Porikos & Koopmans <sup>(78)</sup> | Rats, female   | Between groups | 27 (81 total)             | 0.2% saccharin plus either 0.055, 0.11 or 0.22 aspartame | Solutions available alongside chow and water for 8 wks<br><br>After 8 wks each group subdivided:<br>1. continue on sweetened f solution,<br>2. switch to other sweetened solution<br>3. sacrificed to determine body composition | Group 1: chow + water<br><br>Group 2 : 11% sucrose solution<br><br>Group 3: saccharin + one of doses aspartame |          | Higher BW sucrose rats than controls, no diff LES vs control.<br><br>When sucrose switched to sweetener: BW loss, when sweetener switched to sucrose: rapid BW gain (fat mass)<br><br>Food intake in line with BW |

| Reference                           | Species tested             | Design         | Sample size per condition | Type LES              | Dietary manipulation                                                                                          | Experimental conditions                                                          | Measures          | Outcome                                                        |
|-------------------------------------|----------------------------|----------------|---------------------------|-----------------------|---------------------------------------------------------------------------------------------------------------|----------------------------------------------------------------------------------|-------------------|----------------------------------------------------------------|
| Ramirez <sup>(79)</sup><br>(Exp. 1) | Charles River rats, female | Between groups | 19                        | 0.2% sodium saccharin | Addition of saccharin to wet diet (chow with added water) 6 weeks                                             | Group-housed rats fed diet with 80% water added, with or without added saccharin | BW<br>food intake | Greater food intake and higher BW with LES relative to control |
| Ramirez <sup>(79)</sup><br>(Exp. 2) | Charles River rats, female | Between groups | 10 or 11                  | 0.2% sodium saccharin | Addition of saccharin to wet diet (chow with added water) 6 weeks                                             | Group-housed rats fed diet with 80% water added, with or without added saccharin | BW<br>food intake | No significant differences in BW or food intake                |
| Ramirez <sup>(79)</sup><br>(Exp. 4) | Charles River rats, female | Between groups | 20 or 21                  | 0.2% sodium saccharin | Addition of saccharin to high fat wet diet (chow with added water and oil) 6 weeks                            | Group-housed rats fed diet with 80% water added, with or without added saccharin | BW<br>food intake | Greater food intake and higher BW with LES relative to control |
| Ramirez <sup>(79)</sup><br>(Exp. 5) | Charles River rats, female | Between groups | 16                        | 0.2% sodium saccharin | Addition of saccharin to high fat sucrose-sweetened wet diet (chow with added water, sucrose and oil) 6 weeks | Group-housed rats fed diet with 80% water added, with or without added saccharin | BW<br>food intake | Greater food intake and higher BW with LES relative to control |

| Reference                            | Species tested             | Design                               | Sample size per condition | Type LES                                          | Dietary manipulation                                                                                | Experimental conditions                                                          | Measures                  | Outcome                                                                                                                                |
|--------------------------------------|----------------------------|--------------------------------------|---------------------------|---------------------------------------------------|-----------------------------------------------------------------------------------------------------|----------------------------------------------------------------------------------|---------------------------|----------------------------------------------------------------------------------------------------------------------------------------|
| Ramirez <sup>(79)</sup><br>(Exp. 6)  | Charles River rats, female | Between groups                       | 10 or 11                  | 0.2% sodium saccharin                             | Addition of saccharin to wet diet (chow with added water) 3 weeks, condition reversed after 3 weeks | Group-housed rats fed diet with 80% water added, with or without added saccharin | BW<br>food intake         | Greater food intake and higher BW with LES relative to control over first 3 weeks but no differences between diets after diet reversal |
| Ramirez <sup>(79)</sup><br>(Exp. 7a) | Charles River rats, female | Between groups                       | 9                         | 0.5% sodium saccharin as proportion of solid diet | Addition of 0.5% saccharin to diet (chow) with added water 60% or 80%) for 3 weeks                  | Group-housed rats fed diet with 80% water added, with or without added saccharin | BW<br>food intake         | No significant differences in BW or food intake                                                                                        |
| Ramirez <sup>(79)</sup><br>(Exp. 7b) | Charles River rats, female | Between groups                       | 9                         | 1.0% sodium saccharin as proportion of solid diet | Addition of 1.0% saccharin to diet (chow) with added water 60% or 80%) for 6 weeks                  | Group-housed rats fed diet with 80% water added, with or without added saccharin | BW<br>food intake         | No significant differences in BW or food intake                                                                                        |
| Kanarek et al. <sup>(80)</sup>       | Sprague Dawley CD rats     | Between groups: saccharin vs control | 9                         | 0.15% sodium saccharin                            | <i>Ad libitum</i> access to 0.15% saccharin in drinking water or normal water for 20 days           | Individually housed animals with access to saccharin + water vs water alone      | BW<br>food intake (daily) | No significant differences in BW or food intake                                                                                        |

| Reference                                  | Species tested       | Design                                 | Sample size per condition | Type LES               | Dietary manipulation                                                                      | Experimental conditions                                                     | Measures                  | Outcome                                         |
|--------------------------------------------|----------------------|----------------------------------------|---------------------------|------------------------|-------------------------------------------------------------------------------------------|-----------------------------------------------------------------------------|---------------------------|-------------------------------------------------|
| D'Anci et al. <sup>(81)</sup>              | Male Long Evans rats | Sweetener in drinking water vs control | 10                        | Sodium saccharin       | 0.15% saccharin vs water only, 3 wks                                                      | Sweetener vs normal tap water                                               | BW                        | No significant difference in body-weight        |
| Kanarek et al. <sup>(82)</sup>             | Long Evans rats      | Between groups: saccharin vs control   | 21                        | 0.15% sodium saccharin | <i>Ad libitum</i> access to 0.15% saccharin in drinking water or normal water for 3 weeks | Individually housed animals with access to saccharin + water vs water alone | BW<br>food intake (daily) | No significant differences in BW or food intake |
| Kanarek et al. <sup>(82)</sup><br>(Exp. 1) | Long Evans rats      | Between groups: saccharin vs control   | 11                        | 0.15% sodium saccharin | <i>Ad libitum</i> access to saccharin in drinking water<br>4 wks                          | Individually housed animals with access to saccharin + water vs water alone | BW<br>food intake (daily) | No significant differences in BW or food intake |
| Kanarek et al. <sup>(83)</sup><br>(Exp. 2) | Long Evans rats      | Between groups: saccharin vs control   | 8                         | 0.15% sodium saccharin | <i>Ad libitum</i> access to saccharin in drinking water<br>3 wks                          | Individually housed animals with access to saccharin + water vs water alone | BW<br>food intake (daily) | No significant differences in BW or food intake |

| Reference                                  | Species tested     | Design         | Sample size per condition | Type LES              | Dietary manipulation                      | Experimental conditions                                     | Measures                          | Outcome                                                                                         |
|--------------------------------------------|--------------------|----------------|---------------------------|-----------------------|-------------------------------------------|-------------------------------------------------------------|-----------------------------------|-------------------------------------------------------------------------------------------------|
| Yeomans & Clifton <sup>(84)</sup> (Exp. 1) | Hooded wistar rats | Between groups | 12                        | 0.2% sodium saccharin | saccharin vs water or (10%) sucrose, 17 d | Rats given <i>ad libitum</i> access to LES as well as water | BW<br>food + fluid intake (daily) | No difference BW saccharin vs water<br><br>Lower BW gain of both saccharin and water vs sucrose |
| Yeomans & Clifton <sup>(84)</sup> (Exp. 2) | Hooded wistar rats | Between groups | 12                        | 0.2% sodium saccharin | saccharin vs water or (10%) sucrose, 15 d | Rats given <i>ad libitum</i> access to LES as well as water | BW<br>food + fluid intake (daily) | No difference BW saccharin vs water<br><br>Lower BW gain of both saccharin and water vs sucrose |
| Yeomans & Clifton <sup>(84)</sup> (Exp. 3) | Hooded wistar rats | Between groups | 12                        | 0.2% sodium saccharin | saccharin vs water or (10%) sucrose, 13 d | Rats given <i>ad libitum</i> access to LES as well as water | BW<br>food + fluid intake (daily) | No difference BW saccharin vs water<br><br>Lower BW gain of both saccharin and water vs sucrose |

| Reference                                       | Species tested                       | Design                                 | Sample size per condition | Type LES               | Dietary manipulation                                                                 | Experimental conditions                                                     | Measures                  | Outcome                                         |
|-------------------------------------------------|--------------------------------------|----------------------------------------|---------------------------|------------------------|--------------------------------------------------------------------------------------|-----------------------------------------------------------------------------|---------------------------|-------------------------------------------------|
| D'Anci <sup>(85)</sup><br>(Exp. 1)              | Male Long Evans rats                 | Sweetener in drinking water vs control | 10                        | Sodium saccharin       | 0.15% saccharin vs water only, 3 wks                                                 | Sweetener vs normal tap water                                               | BW<br>food intake (daily) | No significant differences in food intake or BW |
| D'Anci <sup>(85)</sup><br>(Exp. 2)              | Male Long Evans rats                 | Sweetener in drinking water vs control | 10                        | Sodium saccharin       | 0.15% saccharin vs water only, 3 wks                                                 | Sweetener vs normal tap water                                               | BW<br>food intake (daily) | No significant differences in food intake or BW |
| Kanarek & Homoleski <sup>(86)</sup><br>(Exp. 1) | Long–Evans VAF rats, male and female | Between groups: saccharin vs control   | 18                        | 0.15% sodium saccharin | <i>Ad libitum</i> access to 0.15% saccharin in drinking water vs normal water, 3 wks | Individually housed animals with access to saccharin + water vs water alone | BW<br>food intake (daily) | No significant differences in BW or food intake |
| Kanarek & Homoleski <sup>(86)</sup><br>(Exp. 2) | Long–Evans VAF rats, male and female | Between groups: saccharin vs control   | 16                        | 0.15% sodium saccharin | <i>Ad libitum</i> access to 0.15% saccharin in drinking water vs normal water, 3 wks | Individually housed animals with access to saccharin + water vs water alone | BW<br>food intake (daily) | No significant differences in BW or food intake |

| Reference                    | Species tested | Design                                          | Sample size per condition | Type LES             | Dietary manipulation                             | Experimental conditions                              | Measures          | Outcome                                                                                              |
|------------------------------|----------------|-------------------------------------------------|---------------------------|----------------------|--------------------------------------------------|------------------------------------------------------|-------------------|------------------------------------------------------------------------------------------------------|
| Feijó et al. <sup>(87)</sup> | Wistar rats    | Yogurt with added aspartame, saccharin or sugar | 10                        | Saccharin, aspartame | Supplementary sweetened foods with different LES | Aspartame, saccharin or sucrose sweetened supplement | BW<br>food intake | Higher BW gain saccharin and aspartame vs sucrose supplements, associated with increased chow intake |

LES, low energy sweetener; BW, body weight.

**Table S3. Characteristics and results of animal learning studies on the effects of LES on EI and BW**

| Reference                                           | Species tested | Design                                                     | Sample size per condition                                                                  | Type LES  | Dietary manipulation                                                                                                             | Experimental conditions                                                                                                                                                                                   | Measures                                                | Outcome                                                                                                                                                                                     |
|-----------------------------------------------------|----------------|------------------------------------------------------------|--------------------------------------------------------------------------------------------|-----------|----------------------------------------------------------------------------------------------------------------------------------|-----------------------------------------------------------------------------------------------------------------------------------------------------------------------------------------------------------|---------------------------------------------------------|---------------------------------------------------------------------------------------------------------------------------------------------------------------------------------------------|
| Swithers & Davidson <sup>(88)</sup><br><br>(Exp. 1) | Rat            | Between groups: predictive vs non-predictive vs sweet-only | 8 in glucose (predictive)<br>9 in LES group (non-predictive)<br>10 in control (sweet-only) | Saccharin | 30 g low-fat yogurt alongside chow + water, access 23 h/d for 5 wks<br><br>3 d for yogurt + chow and 1 day for chow + water only | Glucose: plain yogurt on 3 d/w, sweet yogurt (20% glucose) on 3 d/w<br><br>LES: plain yogurt on 3 d/w and sweet yogurt (0.3% saccharin) on 3 d/w<br><br>Control: sweet yogurt (20% glucose) on 3 d/w only | BW<br><br>energy intake<br><br>body composition         | Higher BW gain LES vs glucose or control<br><br>No sign. effects on food intake<br><br>Greater adiposity LES vs glucose and control                                                         |
| Swithers & Davidson <sup>(88)</sup><br><br>(Exp. 2) | Rat            | Between groups: predictive vs non-predictive               | 11 in glucose (predictive)<br>9 in LES group (non-predictive)                              | Saccharin | 30 g low-fat, plain yogurt alongside chow + water, access 23 h/d for 14 d                                                        | Glucose: plain yogurt on 7 d, sweet yogurt (20% glucose) on 7 d<br><br>LES: plain yogurt on 7 d, sweet yogurt (0.3% saccharin) on 7 d                                                                     | BW gain<br><br>energy intake<br><br>energy compensation | Higher BW gain LES vs glucose<br><br>Higher energy intake LES vs sugar over course of training<br><br>Glucose rats showed caloric compensation by decreasing chow intake after novel yogurt |



| Reference                                       | Species tested | Design                                             | Sample size per condition | Type LES           | Dietary manipulation                                                                                       | Experimental conditions                                                                                                                                                                                                                 | Measures | Outcome                                             |
|-------------------------------------------------|----------------|----------------------------------------------------|---------------------------|--------------------|------------------------------------------------------------------------------------------------------------|-----------------------------------------------------------------------------------------------------------------------------------------------------------------------------------------------------------------------------------------|----------|-----------------------------------------------------|
| Swithers et al. <sup>(89)</sup><br><br>(Exp. 1) | Rat            | Between groups:<br>Saccharin vs<br>AceK vs Glucose | 8                         | Saccharin,<br>AceK | 30 g low-fat,<br>plain yogurt<br>alongside chow<br>+ water,<br>access 23 h/d for<br>14 d                   | Glucose: plain yogurt on 7<br>d, sweet yogurt (20%<br>glucose) on 7 d<br><br>LES (sacch): plain yogurt<br>on 7 d, sweet yogurt (0.3%<br>saccharin) on 7 d<br><br>LES (AceK): plain yogurt<br>on 7 d, sweet yogurt (0.3%<br>AceK) on 7 d | BW gain  | Greater BW gain<br>saccharin- or AceK vs<br>glucose |
| Swithers et al. <sup>(89)</sup><br><br>(Exp. 2) | Rat            | Between groups:<br>Saccharin vs<br>AceK vs Glucose | 11                        | Saccharin,<br>AceK | 20 g of yogurt for<br>1 h/d; 6 d/wk for<br>2 wks, with 1 d<br>of chow + water<br>(between 1st +<br>2nd wk) | Glucose: plain yogurt on 7<br>d, sweet yogurt (20%<br>glucose) on 7 d<br><br>LES (sacch): plain yogurt<br>on 7 d, sweet yogurt (0.3%<br>saccharin) on 7 d<br><br>LES (AceK): plain yogurt<br>on 7 d, sweet yogurt (0.3%<br>AceK) on 7 d | BW gain  | Greater BW gain<br>saccharin- or AceK vs<br>glucose |

| Reference                                       | Species tested | Design                                                                                                                | Sample size per condition | Type LES  | Dietary manipulation                                                                                                                                                 | Experimental conditions                                                                                                                                                                                                                                                                                                                      | Measures                                        | Outcome                                                                                                                                                                                 |
|-------------------------------------------------|----------------|-----------------------------------------------------------------------------------------------------------------------|---------------------------|-----------|----------------------------------------------------------------------------------------------------------------------------------------------------------------------|----------------------------------------------------------------------------------------------------------------------------------------------------------------------------------------------------------------------------------------------------------------------------------------------------------------------------------------------|-------------------------------------------------|-----------------------------------------------------------------------------------------------------------------------------------------------------------------------------------------|
| Swithers et al. <sup>(89)</sup><br><br>(Exp. 3) | Rat            | Between groups: saccharin vs glucose<br><br>Additional factor: discontinuation of diets                               | 13                        | Saccharin | 20 g of yogurt for 1 h/d; 6 d/wk for 2 wks, with 1 d of chow + water (between 1st + 2nd wk)<br><br>After 2 wks, no more yogurt, but BW measured for 2 additional wks | Glucose: plain yogurt on 7 d, sweet yogurt (20% glucose) on 7 d<br><br>LES: plain yogurt on 7 d, sweet yogurt (0.3% saccharin) on 7 d                                                                                                                                                                                                        | BW gain                                         | Higher BW gain saccharin vs sucrose<br><br>Once yogurt presentation was discontinued, BW gain similar across the groups                                                                 |
| Swithers et al. <sup>(89)</sup><br><br>(Exp. 4) | Rat            | Between groups: Base diet (yogurt vs beans), sweetener type (LES vs glucose), and phase (yogurt first vs beans first) | 5 to 7                    | Saccharin | 30 g of plain unsweetened diet + 30 g of sweetened diet for 23 h/d, 6 d/w (3 d sweetened + 3 days plain)                                                             | Group 1: glucose beans then glucose yogurt<br>Group 2: glucose beans then LES yogurt<br>Group 3: LES beans then glucose yogurt<br>Group 4: LES beans then LES yogurt<br>Group 5: glucose yogurt then glucose beans<br>Group 6: glucose yogurt then LES beans<br>Group 7: LES yogurt then glucose beans<br>Group 8: LES yogurt then LES beans | BW gain<br><br>energy compensation for pre meal | Phase 1: higher BW gain LES vs glucose rats regardless of diet (overall: beans group higher BW than yogurt group)<br>Phase 2: Glucose–glucose rats gained less BW than all other groups |

| Reference                                       | Species tested | Design                                                                                               | Sample size per condition          | Type LES  | Dietary manipulation                                                                                     | Experimental conditions                                                                                                                                                  | Measures                                                         | Outcome                                                                                                                     |
|-------------------------------------------------|----------------|------------------------------------------------------------------------------------------------------|------------------------------------|-----------|----------------------------------------------------------------------------------------------------------|--------------------------------------------------------------------------------------------------------------------------------------------------------------------------|------------------------------------------------------------------|-----------------------------------------------------------------------------------------------------------------------------|
| Swithers et al. <sup>(90)</sup><br><br>(Exp. 1) | Rat            | Between groups: saccharin vs glucose<br><br>Additional factor: caffeine added to diet                | 12 or 13                           | Saccharin | 50 g of a flavored, sweetened liquid, 14 d                                                               | Group 1: glucose (20%)<br>Group 2: glucose + caffeine<br>Group 3: saccharin (0.3%)<br>Group 4: saccharin + caffeine                                                      | BW gain<br><br>energy intake                                     | higher BW gain when access to LES vs glucose                                                                                |
| Swithers et al. <sup>(90)</sup><br><br>(Exp. 2) | Rat            | Between groups: saccharin vs glucose<br><br>Additional factor: caffeine added to diet                | 8 or 9                             | Saccharin | High fat/sweet diet, with 30 g of sweetened liquid 6 d/w for 4 wks                                       | Group 1: glucose (20%)<br>Group 2: glucose + caffeine<br>Group 3: saccharin (0.3%)<br>Group 4: saccharin + caffeine                                                      | BW gain<br><br>body fat % gain                                   | Higher BW gain LES vs glucose                                                                                               |
| Davidson et al. <sup>(91)</sup><br><br>(Exp. 2) | rats           | Three diets (standard, standard + unsweet carb, standard + sweet carb) combined with supplement food | 10                                 | Saccharin | supplement sweetened with either glucose or saccharin on 50% of days                                     | 6 different diet/supplement combinations                                                                                                                                 | BW change                                                        | Faster growth with saccharin vs glucose supplement                                                                          |
| Swithers et al. <sup>(92)</sup><br><br>(Exp. 1) | Rat            | Between groups: saccharin vs glucose                                                                 | 15 for saccharin<br>16 for glucose | Saccharin | 30 g plain unsweetened diet + 30 g sweetened diet, 6 d/w (3 d sweetened + 3 d plain)<br><br>Yogurt diets | Group 1 (LES): plain yogurt on 3 d/w, sweetened yogurt (0.3% saccharin) on 3 d/w<br><br>Group 2 (LES): plain yogurt on 3 d/w, sweetened yogurt (0.3% saccharin) on 3 d/w | BW gain<br><br>blood glucose response with and without test meal | Higher BW gain LES vs glucose<br><br>Rats previously given LES higher blood glucose levels following a test meal vs glucose |

| Reference                                | Species tested | Design                               | Sample size per condition        | Type LES  | Dietary manipulation                                                                 | Experimental conditions                                                                                                                                                  | Measures                                                                          | Outcome                                                                                                                                              |
|------------------------------------------|----------------|--------------------------------------|----------------------------------|-----------|--------------------------------------------------------------------------------------|--------------------------------------------------------------------------------------------------------------------------------------------------------------------------|-----------------------------------------------------------------------------------|------------------------------------------------------------------------------------------------------------------------------------------------------|
|                                          |                |                                      |                                  |           |                                                                                      | available for 3 h daily, for 14 d                                                                                                                                        |                                                                                   |                                                                                                                                                      |
| Swithers et al. <sup>(92)</sup> (Exp. 2) | Rat            | Between groups: saccharin vs glucose | 10 (blood glucose from 5/group)  | Saccharin | 30 g plain unsweetened diet + 30 g sweetened diet, 6 d/w (3 d sweetened + 3 d plain) | Group 1 (LES): plain yogurt on 3 d/w, sweetened yogurt (0.3% saccharin) on 3 d/w<br><br>Group 2 (LES): plain yogurt on 3 d/w, sweetened yogurt (0.3% saccharin) on 3 d/w | BW gain<br><br>blood glucose to oral glucose                                      | Higher BW gain LES vs glucose<br><br>Higher blood glucose levels LES vs glucose (indicating an increase for levels in LES rats)                      |
|                                          |                |                                      |                                  |           | Yogurt diets available for 24 h daily, for 20 d                                      |                                                                                                                                                                          |                                                                                   |                                                                                                                                                      |
| Swithers et al. <sup>(92)</sup> (Exp. 3) | Rat            | Between groups: saccharin vs glucose | 7 for saccharin<br>6 for glucose | Saccharin | 30 g plain unsweetened diet + 30 g sweetened diet, 6 d/w (3 d sweetened + 3 d plain) | Group 1 (LES): plain yogurt on 3 d/w, sweetened yogurt (0.3% saccharin) on 3 d/w<br><br>Group 2 (LES): plain yogurt on 3 d/w, sweetened yogurt (0.3% saccharin) on 3 d/w | BW gain<br><br>glycemic responses to glucose (oral intake or delivered by gavage) | No differences BW gain<br><br>Higher blood glucose levels LES vs glucose rats following oral glucose load<br><br>No difference in response to gavage |
|                                          |                |                                      |                                  |           | Yogurt diets available for 24 h daily, for 14 d                                      |                                                                                                                                                                          |                                                                                   |                                                                                                                                                      |

| Reference                                   | Species tested | Design                                     | Sample size per condition              | Type LES  | Dietary manipulation                                                                                                                                                   | Experimental conditions                                                                                                                                                                    | Measures                                                                                         | Outcome                                                                                                                                                                                                                                                                               |
|---------------------------------------------|----------------|--------------------------------------------|----------------------------------------|-----------|------------------------------------------------------------------------------------------------------------------------------------------------------------------------|--------------------------------------------------------------------------------------------------------------------------------------------------------------------------------------------|--------------------------------------------------------------------------------------------------|---------------------------------------------------------------------------------------------------------------------------------------------------------------------------------------------------------------------------------------------------------------------------------------|
| Swithers et al. <sup>(92)</sup><br>(Exp. 4) | Rat            | Between groups:<br>saccharin vs<br>glucose | 7 for<br>saccharin<br>8 for<br>glucose | Saccharin | 30 g plain<br>unsweetened<br>diet +<br>30 g sweetened<br>diet,<br>6 d/w (3 d<br>sweetened + 3 d<br>plain)<br><br>Yogurt diets<br>available for 24 h<br>daily, for 24 d | Group 1 (LES): plain<br>yogurt on 3 d/w,<br>sweetened yogurt (0.3%<br>saccharin) on 3 d/w<br><br>Group 2 (LES): plain<br>yogurt on 3 d/w,<br>sweetened yogurt (0.3%<br>saccharin) on 3 d/w | BW gain<br><br>glycemic<br>responses to<br>glucose (oral<br>intake or<br>delivered by<br>gavage) | Day X Sweetener<br>interaction but post-<br>hoc testing did not<br>reveal significant<br>differences on any<br>individual day for<br>body weight<br><br><br>Higher blood glucose<br>with oral glucose and<br>taste + gavage, but<br>not with gavage only.<br><br>No effect on insulin |
| Swithers et al. <sup>(92)</sup><br>(Exp. 5) | Rat            | Between groups:<br>saccharin vs<br>glucose | 8                                      | Saccharin | High fat/sweet<br>diet, with 30 g of<br>sweetened<br>solution (0.3%<br>saccharin vs<br>20% glucose)<br>Solution<br>available for 24 h<br>daily, for 24 d               | Group 1 (glucose): high fat<br>diet + daily access to 10%<br>glucose solution<br><br>Group 2 (LES): high fat<br>diet plus daily access to<br>0.3% saccharin solution                       | BW gain<br><br>energy intake<br><br>glycemic<br>responses<br><br>GLP1                            | Higher BW gain and<br>greater food intake<br>LES vs glucose<br><br>Blood glucose higher<br>and GLP lower in<br>LES vs glucose<br>group, but only for<br>oral and not for<br>gavage test                                                                                               |

| Reference                                       | Species tested             | Design                               | Sample size per condition          | Type LES  | Dietary manipulation                                                                       | Experimental conditions                                                                                                                                                                                          | Measures                                                             | Outcome                                                                                                                                                                                                                   |
|-------------------------------------------------|----------------------------|--------------------------------------|------------------------------------|-----------|--------------------------------------------------------------------------------------------|------------------------------------------------------------------------------------------------------------------------------------------------------------------------------------------------------------------|----------------------------------------------------------------------|---------------------------------------------------------------------------------------------------------------------------------------------------------------------------------------------------------------------------|
| Swithers et al. <sup>(92)</sup><br><br>(Exp. 6) | Rat                        | Between groups: saccharin vs glucose | 23                                 | Saccharin | High-fat/sweet diet, with 30 g plain unsweetened diet + 30 g sweetened diet 6d/w for 4 wks | Group 1 (glucose): plain yogurt on 3 days and yogurt sweetened with 20% glucose on 3 days per week<br><br>Group 2 (saccharin) plain yogurt on 3 days and yogurt sweetened with 0.3% saccharin on 3 days per week | BW gain<br><br>Body composition<br><br>glycemic response<br><br>GLP1 | Higher BW gain and calorie intake LES vs glucose<br><br>Fat mass not affected<br><br>Higher blood glucose LES after presentation of the glucose<br><br>A trend for GLP 1 to be lower overall<br><br>No effect for insulin |
| Swithers et al. <sup>(93)</sup><br><br>(Exp. 1) | Ovariectomised female rats | Between groups: saccharin vs glucose | 13 for saccharin<br>12 for glucose | Saccharin | 30 g plain unsweetened diet + 30 g sweetened diet 6d/w for 4 wks                           | Group 1 (glucose): plain yogurt on 3 days and yogurt sweetened with 20% glucose on 3 days per week<br><br>Group 2 (saccharin) plain yogurt on 3 days and yogurt sweetened with 0.3% saccharin on 3 days per week | BW gain<br><br>energy intake                                         | No effect of sweetener on BW gain or energy intake                                                                                                                                                                        |

| Reference                                   | Species tested             | Design                                                                                                                                             | Sample size per condition           | Type LES  | Dietary manipulation                                                                             | Experimental conditions                                                                                                                                                                                                                                                                                                                                                     | Measures                                         | Outcome                                                                                                                                                                                                                                                                     |
|---------------------------------------------|----------------------------|----------------------------------------------------------------------------------------------------------------------------------------------------|-------------------------------------|-----------|--------------------------------------------------------------------------------------------------|-----------------------------------------------------------------------------------------------------------------------------------------------------------------------------------------------------------------------------------------------------------------------------------------------------------------------------------------------------------------------------|--------------------------------------------------|-----------------------------------------------------------------------------------------------------------------------------------------------------------------------------------------------------------------------------------------------------------------------------|
| Swithers et al. <sup>(93)</sup><br>(Exp. 2) | Ovariectomised Female rats | Between groups: saccharin vs glucose<br><br>Additional factor: of age of Ovariectomy and inhibition of local estrogen production using Anastrozole | 8 or 9 (adolescents)<br>12 (adults) | Saccharin | 30 g plain unsweetened diet +<br>30 g sweetened diet 6d/w for 20 d (10 d sweet, 10 d unsweetend) | Group 1: adult, glucose, Anastrozole<br>Group 2: adult, glucose, Anastrozole vehicle<br>Group 3: adult, saccharin, Anastrozole<br>Group 4: adolescent, LES, Anastrozole vehicle<br>Group 5: adolescent, glucose, Anastrozole<br>Group 6: adolescent, glucose, Anastrozole vehicle<br>Group 7: adolescent, LES, Anastrozole<br>Group 8: adolescent, LES, Anastrozole vehicle | BW gain<br>energy intake<br><br>body composition | Four-way interaction for BW (Age x LES/glucose x Drug x Day)<br><br>Adult rats: Higher BW gain LES vs glucose, but only for Anastrozole.<br>Adolescents rats: higher BW gain LES vs glucose, but only for vehicle group<br><br>Similar effect for total intake and fat mass |
| Swithers et al. <sup>(94)</sup><br>(Exp. 1) | Female rats                | Between groups: saccharin vs glucose<br><br>Additional factor: diet resistant (DR) and diet-induced obese (DIO)                                    | 10                                  | Saccharin | 30 g plain unsweetened diet +<br>30 g sweetened diet 6d/w for 4 wks                              | Group 1 (glucose): plain yogurt on 3 days and yogurt sweetened with 20% glucose on 3 days per week<br><br>Group 2 (saccharin) plain yogurt on 3 days and yogurt sweetened with 0.3% saccharin on 3 days per week                                                                                                                                                            | BW gain                                          | No effect on BW gain                                                                                                                                                                                                                                                        |

| Reference                                       | Species tested | Design                                                                                                          | Sample size per condition | Type LES  | Dietary manipulation                                                                       | Experimental conditions                                                                | Measures                                             | Outcome                                                                                                                                                                                                                                           |
|-------------------------------------------------|----------------|-----------------------------------------------------------------------------------------------------------------|---------------------------|-----------|--------------------------------------------------------------------------------------------|----------------------------------------------------------------------------------------|------------------------------------------------------|---------------------------------------------------------------------------------------------------------------------------------------------------------------------------------------------------------------------------------------------------|
| Swithers et al. <sup>(94)</sup><br><br>(Exp. 2) | Female rats    | Between groups: saccharin vs glucose<br><br>Additional factor: diet resistant (DR) and diet-induced obese (DIO) | 7 to 9                    | Saccharin | High-fat sweet diet, with 30 g plain unsweetened diet + 30 g sweetened diet 6d/w for 4 wks | Group 1: glucose, DR<br>Group 2: glucose, DIO<br>Group 3: LES, DR<br>Group 4: LES, DIO | BW gain<br><br>energy intake<br><br>body composition | Greater BW LES vs glucose, but only for DIO rats<br><br>Fat mass greater in LES vs glucose, but only for DIO rats<br><br>Both DIO and DR: Higher intake HE-chow LES vs glucose groups, but overall energy intake was higher in the DIO group only |
| Swithers et al. <sup>(94)</sup><br><br>(Exp. 3) | Female rats    | Between groups: saccharin vs glucose<br><br>Additional factor: diet resistant (DR) and diet-induced obese (DIO) | 10 or 11                  | Saccharin | High-fat sweet diet, 30 g plain unsweetened diet + 30 g sweetened diet 6d/w for 4 wks      | Group 1: glucose, DR<br>Group 2: glucose, DIO<br>Group 3: LES, DR<br>Group 4: LES, DIO | BW gain<br><br>body composition                      | Greater BW LES vs glucose but only for DIO rats<br><br>Greater fat mass LES vs glucose, but only in DIO-rats                                                                                                                                      |



| Reference                                       | Species tested                                                                                 | Design                                                                                                          | Sample size per condition | Type LES  | Dietary manipulation                                                                                                                                                                                                    | Experimental conditions                                                                | Measures                        | Outcome                                                                                                |
|-------------------------------------------------|------------------------------------------------------------------------------------------------|-----------------------------------------------------------------------------------------------------------------|---------------------------|-----------|-------------------------------------------------------------------------------------------------------------------------------------------------------------------------------------------------------------------------|----------------------------------------------------------------------------------------|---------------------------------|--------------------------------------------------------------------------------------------------------|
| Swithers et al. <sup>(94)</sup><br><br>(Exp. 4) | Male rats                                                                                      | Between groups: saccharin vs glucose<br><br>Additional factor: diet resistant (DR) and diet-induced obese (DIO) | 10 to 12                  | Saccharin | High fat/sweet diet, 30 g plain unsweetened diet + 30 g of a sweetened diet for 16 d (8 d plain, 8 d sweetened), with 2 d of chow + water alone intervening                                                             | Group 1: glucose, DR<br>Group 2: glucose, DIO<br>Group 3: LES, DR<br>Group 4: LES, DIO | BW gain                         | Higher BW gain LES vs glucose for both DIO and DR male rats                                            |
| Swithers et al. <sup>(94)</sup><br><br>(Exp. 5) | female rats, offspring of adult obesity prone (OP) obesity resistant (OR) male and female rats | Between groups: saccharin vs glucose<br><br>Additional factor: diet resistant (DR) and diet-induced obese (DIO) | 8 to 13 (44 total)        | Saccharin | Yogurt supplements for 6 d (3 d sweetened + 3 d plain) along with 1 d of chow alone<br><br>Rats were then given <i>ad lib</i> access to sweetened HE diet assigned yogurt continued for 6 d/w for an additional 2 weeks | Group 1: glucose, DR<br>Group 2: glucose, DIO<br>Group 3: LES, DR<br>Group 4: LES, DIO | BW gain<br><br>body composition | Greater BW LES vs glucose, but only for OP rats<br><br>Greater fat mass gain with saccharin vs glucose |

LES, low energy sweetener; BW, body weight.

**Table S4. Characteristics of prospective cohort studies reporting information on association between LES consumption and body weight status change**

| Authors, year                 | N with complete data, gender, age (range or mean) | Inclusion criteria (study population, location) | Dietary assessment method                    | Covariates (in adjusted models)                                                                          | Duration, n at follow-up         | Endpoint                              | Effect size                                                     | Notes                                                                                                   |
|-------------------------------|---------------------------------------------------|-------------------------------------------------|----------------------------------------------|----------------------------------------------------------------------------------------------------------|----------------------------------|---------------------------------------|-----------------------------------------------------------------|---------------------------------------------------------------------------------------------------------|
| Ludwig et al. <sup>(27)</sup> | n= 548<br>M / F                                   | Children, 6th or 7th grade on five schools      | <b>Youth FFQ</b> (one question on diet soda) | Age, sex, baseline BMI + skin folds, ethnicity, school, dietary variables, physical activity, TV viewing | <b>19 months</b><br>84% complete | <b>BMI</b><br>regression coefficients | baseline and $\Delta$ BMI<br>coefficients<br>negative<br>p=0.10 | Association baseline obesity and diet soda NS (p=0.69)<br><br>$\Delta$ diet soda<br>OR=0.44<br>(p=0.03) |

| <b>Authors, year</b>          | <b>N with complete data, gender, age (range or mean)</b> | <b>Inclusion criteria (study population, location)</b> | <b>Dietary assessment method</b>                                                     | <b>Covariates (in adjusted models)</b>                                                                                                                | <b>Duration, n at follow-up</b>             | <b>Endpoint</b>                                      | <b>Effect size</b>                                                        | <b>Notes</b>                          |
|-------------------------------|----------------------------------------------------------|--------------------------------------------------------|--------------------------------------------------------------------------------------|-------------------------------------------------------------------------------------------------------------------------------------------------------|---------------------------------------------|------------------------------------------------------|---------------------------------------------------------------------------|---------------------------------------|
| Berkey et al. <sup>(23)</sup> | n= 11 755<br>M / F<br>(unspecified)                      | Children, offspring of US Nurse's Health Study II      | <b>132-item FFQ</b><br>(beverages: diet soda, sugar-added drinks, fruit juice, milk) | Age, Tanner stage, race, menarche, prior BMI z-score, height growth, milk, milk type, sugar added drinks, fruit juices, physical activity, inactivity | <b>1 y</b><br>1996 to 1997,<br>1997 to 1998 | <b>ΔBMI</b><br>self-reported regression coefficients | Boys: 0.116<br>(SE 0.049),<br>p=0.016                                     | Energy adjustment made no difference. |
| Growing up today study (GUTS) | 9-14 y in 1996                                           | 1996-1998<br><br>USA<br>(50 states)                    |                                                                                      |                                                                                                                                                       |                                             |                                                      | Girls: 0.052<br>(SE 0.035),<br>p=0.15<br><br>ΔBMI per serving of<br>LES/d |                                       |

| <b>Authors, year</b>                  | <b>N with complete data, gender, age (range or mean)</b> | <b>Inclusion criteria (study population, location)</b>                                             | <b>Dietary assessment method</b>                                                                                                                                 | <b>Covariates (in adjusted models)</b>                                                      | <b>Duration, n at follow-up</b>      | <b>Endpoint</b>                      | <b>Effect size</b> | <b>Notes</b> |
|---------------------------------------|----------------------------------------------------------|----------------------------------------------------------------------------------------------------|------------------------------------------------------------------------------------------------------------------------------------------------------------------|---------------------------------------------------------------------------------------------|--------------------------------------|--------------------------------------|--------------------|--------------|
| Striegel-Moore et al. <sup>(22)</sup> | n=2371<br>0 M/ 2371 F<br>9-10 y at study entry           | Girls<br>1987-1997<br>USA<br>(Schools in Berkeley, near Cincinnati, Washington DC; HMO and scouts) | <b>3-day food record</b><br>(diet sodas: artificially sweetened fizzy soft drinks except water, diet or low energy) consecutive days:<br>1 weekend + 2 week days | Site, visit, race, milk, regular soda, fruit juice, fruit drinks, coffee/tea, energy intake | <b>10 y</b><br>10 annual assessments | <b>BMI</b><br>regression coefficient | -0.010 (SE 0.013)  |              |

| <b>Authors, year</b>          | <b>N with complete data, gender, age (range or mean)</b> | <b>Inclusion criteria (study population, location)</b> | <b>Dietary assessment method</b>                                                                   | <b>Covariates (in adjusted models)</b>                                                   | <b>Duration, n at follow-up</b> | <b>Endpoint</b>                                 | <b>Effect size</b> | <b>Notes</b>              |
|-------------------------------|----------------------------------------------------------|--------------------------------------------------------|----------------------------------------------------------------------------------------------------|------------------------------------------------------------------------------------------|---------------------------------|-------------------------------------------------|--------------------|---------------------------|
| Fowler et al. <sup>(20)</sup> | n= 3371<br>M / F                                         | Adults, random sample of residents                     | Questions on sweeteners in soda, tea and coffee to quantify artificially sweetened beverages (ASB) | Age, gender, BMI, ethnicity, education, socioeconomic index, exercise, smoking cessation | <b>7-8 y</b>                    | <b>ΔBMI</b><br>regression coefficients (95% CI) | 0.47 (0.26-0.66)   | in ASB users vs non-users |
| San Antonio Heart Study       | aged 25-64 y, NW/OW                                      | enrolled 1979-1988<br>USA<br>(San Antonio, Texas)      |                                                                                                    |                                                                                          | 65% (n=5158 enrolled)           |                                                 |                    |                           |

| Authors, year               | N with complete data, gender, age (range or mean) | Inclusion criteria (study population, location)                                                                 | Dietary assessment method                                                                                  | Covariates (in adjusted models)                                                                                                                       | Duration, n at follow-up                                                        | Endpoint                                                       | Effect size                                                    | Notes                                                        |
|-----------------------------|---------------------------------------------------|-----------------------------------------------------------------------------------------------------------------|------------------------------------------------------------------------------------------------------------|-------------------------------------------------------------------------------------------------------------------------------------------------------|---------------------------------------------------------------------------------|----------------------------------------------------------------|----------------------------------------------------------------|--------------------------------------------------------------|
| Chen et al. <sup>(25)</sup> | n= 810<br>M / F<br>(unspecified)                  | Adults<br>2000-2002<br>(behavioral interventions)<br>USA<br>(4 US centres, SBP 120-159 mmHg and DBP 80-95 mmHg) | <b>Two 24-hr recalls</b><br>(diet drinks: diet soft drink and other 'diet' drinks)<br>1 weekend, 1 weekday | Sex, race, age, income, education, marital status, employment, BMI,<br>all beverages, intervention, change in fitness and physical activity, total EI | <b>18 months</b><br>recall at baseline, 6 and 18 months<br>no loss to follow up | <b>ΔBW</b><br>at 18 months<br>regression coefficients (95% CI) | -0.38 (-0.22 - 0.01)<br>for Δ1 serving/d of 355 ml diet drink) | Additional adjustment for dietary factors made no difference |

| <b>Authors, year</b>                         | <b>N with complete data, gender, age (range or mean)</b> | <b>Inclusion criteria (study population, location)</b> | <b>Dietary assessment method</b>                                       | <b>Covariates (in adjusted models)</b>                                                                                                                      | <b>Duration, n at follow-up</b>         | <b>Endpoint</b>                                                          | <b>Effect size</b>                                        | <b>Notes</b>                                 |
|----------------------------------------------|----------------------------------------------------------|--------------------------------------------------------|------------------------------------------------------------------------|-------------------------------------------------------------------------------------------------------------------------------------------------------------|-----------------------------------------|--------------------------------------------------------------------------|-----------------------------------------------------------|----------------------------------------------|
| Nettleton et al. <sup>(28)</sup>             | n=2928<br>M / F<br>(unspecified)                         | Adults,<br>white, black,<br>Hispanic,<br>Chinese       | <b>FFQ</b><br>(diet soda: diet soft drinks, unsweetened mineral water) | Study site,<br>age, sex,<br>race/ethnicity,<br>education,<br>energy intake,<br>physical activity,<br>smoking<br>status, pack<br>years,<br>supplement<br>use | <b>5 y</b><br><br>n(n=6814<br>enrolled) | <b>High WC</b><br>(M: ≥102 mc,<br>F: ≥ 88cm)<br>Hazard ratio<br>(95% CI) | 1.59 (1.23 -<br>2.07)<br>(≥1 serving/d<br>vs. rare/never) | Dose-<br>response<br>across WC<br>categories |
| Multi-Ethnic Study of Atherosclerosis (MESA) | 45-84 y                                                  | 2000-2002<br><br>USA<br>(6 sites)                      |                                                                        |                                                                                                                                                             |                                         |                                                                          |                                                           |                                              |

| <b>Authors, year</b>             | <b>N with complete data, gender, age (range or mean)</b> | <b>Inclusion criteria (study population, location)</b> | <b>Dietary assessment method</b>                   | <b>Covariates (in adjusted models)</b>                                                            | <b>Duration, n at follow-up</b>     | <b>Endpoint</b>                          | <b>Effect size</b>               | <b>Notes</b>                                                 |
|----------------------------------|----------------------------------------------------------|--------------------------------------------------------|----------------------------------------------------|---------------------------------------------------------------------------------------------------|-------------------------------------|------------------------------------------|----------------------------------|--------------------------------------------------------------|
| Vanselow et al. <sup>(29)</sup>  | n=2294 (1032 M / 1262 F)                                 | Adolescents enrolled 1998-1999                         | <b>149-item FFQ</b> (with low-calorie soft drinks) | Age, cohort, sex, race, BMI, SES, baseline beverages, physical activity, TV watching, tea, coffee | <b>5 y</b> (follow-up in 2003-2004) | <b>ΔBMI</b> 5 yrs ≥ 7 serving/wk vs none | 1.81 (SE 0.29) vs 1.80 (SE 0.09) | Attenuated with dieting and parent weight concern adjustment |
| Project EAT (Eating Among Teens) | 14.9 y                                                   | USA (Minneapolis, 31 middle + public high schools)     |                                                    |                                                                                                   | 48.7% (n=4706 enrolled)             |                                          |                                  |                                                              |



| <b>Authors, year</b>          | <b>N with complete data, gender, age (range or mean)</b> | <b>Inclusion criteria (study population, location)</b> | <b>Dietary assessment method</b>                                                                                        | <b>Covariates (in adjusted models)</b>                                                                                                    | <b>Duration, n at follow-up</b>                | <b>Endpoint</b>                                                          | <b>Effect size</b>                                          | <b>Notes</b> |
|-------------------------------|----------------------------------------------------------|--------------------------------------------------------|-------------------------------------------------------------------------------------------------------------------------|-------------------------------------------------------------------------------------------------------------------------------------------|------------------------------------------------|--------------------------------------------------------------------------|-------------------------------------------------------------|--------------|
| Duffey et al. <sup>(26)</sup> | n= 3524<br>M / F<br>(unspecified)<br>18-30 y             | Young adults<br><br>1985-1986<br><br>USA<br>(4 sites)  | <b>Diet history</b><br>questionnaire<br>and<br>quantitative<br>diet history<br>(with 'diet<br>beverages'<br>food group) | Race, sex,<br>study centre,<br>age, BMI,<br>education,<br>smoking<br>status,<br>family<br>structure,<br>total EI,<br>physical<br>activity | <b>20 y</b><br><br>72%<br>(n=5115<br>enrolled) | <b>High WC</b><br>(M: ≥102 mc,<br>F: ≥ 88cm)<br>Hazard ratio<br>(95% CI) | 0.84 (0.73 -<br>0.97)<br>(non-<br>consumer vs.<br>consumer) |              |

| Authors, year                | N with complete data, gender, age (range or mean) | Inclusion criteria (study population, location)                           | Dietary assessment method                                                                                                              | Covariates (in adjusted models)                                                                            | Duration, n at follow-up              | Endpoint                               | Effect size                                           | Notes                                                                                            |
|------------------------------|---------------------------------------------------|---------------------------------------------------------------------------|----------------------------------------------------------------------------------------------------------------------------------------|------------------------------------------------------------------------------------------------------------|---------------------------------------|----------------------------------------|-------------------------------------------------------|--------------------------------------------------------------------------------------------------|
| Laska et al. <sup>(24)</sup> | n= 535<br>M / F<br>(unspecified)<br>14.6 y        | Adolescents<br>2006-2008<br>USA<br>(Minneapolis<br>St Paul,<br>Minnesota) | <b>Three 24-hr recalls</b><br>(diet drinks: 'artificially sweetened' soft drinks, fruit drinks, tea, coffee and/or coffee substitutes) | Age, study, physical activity, puberty, race, parental education, eligibility for free/reduced price lunch | <b>2 y</b><br>74%<br>(n=723 enrolled) | <b>ΔBMI</b><br>2 y<br>servings<br>/day | Males -0.11<br>(SE 0.24)<br>Females 0.10<br>(SE 0.23) | <b>ΔPBF</b><br>2 y<br>servings<br>/day<br>Males -0.22<br>(SE 0.778)<br>Females 0.54<br>(SE 0.35) |

| Authors, year              | N with complete data, gender, age (range or mean) | Inclusion criteria (study population, location) | Dietary assessment method | Covariates (in adjusted models)                                                            | Duration, n at follow-up | Endpoint                                                                                                                                                                 | Effect size                                                    | Notes                                                                                                                  |
|----------------------------|---------------------------------------------------|-------------------------------------------------|---------------------------|--------------------------------------------------------------------------------------------|--------------------------|--------------------------------------------------------------------------------------------------------------------------------------------------------------------------|----------------------------------------------------------------|------------------------------------------------------------------------------------------------------------------------|
| Pan et al. <sup>(21)</sup> | n=50 013<br>0 M/50 013 F                          | Nurses in 11 states, baseline 1986<br><br>USA   | <b>FFQ</b><br>(diet soda) | Age, BMI, sleep duration, physical activity, alcohol, TV viewing, smoking, dietary factors | <b>20 y</b>              | $\Delta$ <b>BW</b> (95% CI)<br>(self-reported)<br><br>Self-report weight<br><br>change in 4 y<br><br>period<br><br>Pooled results<br><br>across the<br><br>three cohorts | -0.10 (-0.14 to -0.06) kg<br><br>per serving/d<br><br>increase | Age adjustment<br><br>made no difference<br><br>Effect size slightly stronger in HPS and in overweight or obese people |

| Authors, year                               | N with complete data, gender, age (range or mean) | Inclusion criteria (study population, location)                        | Dietary assessment method | Covariates (in adjusted models) | Duration, <i>n</i> at follow-up | Endpoint | Effect size | Notes |
|---------------------------------------------|---------------------------------------------------|------------------------------------------------------------------------|---------------------------|---------------------------------|---------------------------------|----------|-------------|-------|
| Pan et al. <sup>(21)</sup>                  | n= 52 987<br>0 M/ 52 987 F                        | Younger nurses<br>in 14 states,<br>baseline 1991<br><br>USA            |                           |                                 | 16 y                            |          |             |       |
| Nurses' Health study II (NHS II)            | 27-44 y                                           |                                                                        |                           |                                 |                                 |          |             |       |
| Pan et al. <sup>(21)</sup>                  | n= 22 988<br>22 988 M / 0 F                       | Male health professionals in<br>50 states,<br>baseline 1986<br><br>USA |                           |                                 | 20 y                            |          |             |       |
| Health Professionals Follow up Study (HPFS) | 40-64 y                                           |                                                                        |                           |                                 |                                 |          |             |       |

Rogers et al. Low energy sweeteners systematic review. Supplemental Information.

BW, body weight; EI, energy intake; FFQ, food frequency questionnaire; IHD, ischemic heart disease; LES, low-energy sweeteners; NW, normal weight; OW, overweight; PBF, percentage body fat; SES, socioeconomic status; WC, waist circumference.

**Table S5. Summary of meta-analysis fixed effect results for the various types of human studies**

| Significance test of ES = 0         |                         |                |        |
|-------------------------------------|-------------------------|----------------|--------|
| Comparison                          | Effect size             | 95% CI         | P      |
| Observational studies               | -0.03 kg/m <sup>2</sup> | -0.04 to -0.03 | <0.001 |
| Short interventions                 |                         |                |        |
| LES vs sugar (total energy)         | -124 kcal               | -133 to -115   | <0.001 |
| LES vs sugar (COMPX)                | 29.4%                   | 25.0 to 33.8   | <0.001 |
| LES vs unsweetened                  | 51.7 kcal               | 35.8 to 67.6   | <0.001 |
| LES vs water                        | -1.9 kcal               | -29.7 to 25.8  | 0.892  |
| LES vs nothing                      | 20.9 kcal               | -15.2 to 57.0  | 0.257  |
| LES in capsules vs placebo capsules | -45.0 kcal              | -75.3 to -14.7 | 0.004  |
| Sustained interventions             |                         |                |        |
| LES vs sugar                        | -0.81 kg                | -1.07 to -0.56 | <0.001 |
| LES vs water                        | -1.36 kg                | -2.04 to -0.69 | <0.001 |

**Table S6. Summary of results of Egger’s regression test for funnel plot asymmetry for the various types of human studies**

| Comparison                          | Z statistic | P    |
|-------------------------------------|-------------|------|
| Observational studies               | 1.57        | 0.12 |
| Short interventions                 |             |      |
| LES vs sugar (total energy)         | 0.92        | 0.36 |
| LES vs sugar (COMPX)                | 2.21        | 0.03 |
| LES vs unsweetened                  | 0.49        | 0.62 |
| LES vs water                        | 0.38        | 0.71 |
| LES vs nothing                      | -0.30       | 0.76 |
| LES in capsules vs placebo capsules | 0.62        | 0.53 |
| Sustained interventions             |             |      |
| LES vs sugar                        | -0.35       | 0.73 |
| LES vs water                        | 0.74        | 0.46 |

**Table S7. Characteristics and results of short-term intervention studies comparing the effects on EI of LES versus sugar**

| <i>Children</i>                             | Sample size | Gender, age (y)<br><br>(mean, SD/SEM or range) | Weight status, restraint status | LES and comparison preloads                                                                         | Preload to test meal interval (min) | Intake test meal (kcal), LES vs comparison | Δ cumulative intake (kcal), LES minus comparison (kcal) | COMPX (energy compensation %) | Notes |
|---------------------------------------------|-------------|------------------------------------------------|---------------------------------|-----------------------------------------------------------------------------------------------------|-------------------------------------|--------------------------------------------|---------------------------------------------------------|-------------------------------|-------|
| Anderson et al. <sup>(95)</sup><br>(Exp. 2) | 20          | 10 M / 10 F,<br>10 y                           | Mean weight 30 kg<br>X          | 300 ml strawberry Kool-Aid with 0.3 g aspartame (5 kJ, 1 kcal) or 52.5 g sucrose (892 kJ, 210 kcal) | 90                                  | 777 vs 765                                 | -197                                                    | 6%                            |       |
| Birch et al. <sup>(96)</sup><br>(Exp. 1)    | 24          | 10 M / 14 F,<br>5 y                            | X<br>X                          | 205 mL water with 140 mg aspartame (15 kJ, 3.5 kcal) or 22 g sucrose (376 kJ, 90 kcal)              | 0                                   | 451 vs 397                                 | -32                                                     | 62%                           |       |
| Birch et al. <sup>(96)</sup><br>(Exp. 1)    | 24          | 10 M / 14 F,<br>5 y                            | X<br>X                          | 205 mL water with 140 mg aspartame (15 kJ, 3.5 kcal) or 22 g sucrose (376 kJ, 90 kcal)              | 30                                  | 458 vs 459                                 | -87.5                                                   | -1%                           |       |
| Birch et al. <sup>(96)</sup><br>(Exp. 1)    | 24          | 10 M / 14 F,<br>5 y                            | X<br>X                          | 205 mL water with 140 mg aspartame (15 kJ, 3.5 kcal) or 22 g sucrose (376 kJ, 90 kcal)              | 60                                  | 378 vs 388                                 | -96.5                                                   | -12%                          |       |
| Birch et al. <sup>(96)</sup><br>(Exp. 2)    | 20          | 7 M / 13 F,<br>3 y                             | X<br>X                          | 150 mL water with 102 mg aspartame (11 kJ, 2.6 kcal) or 16 g sucrose (276 kJ, 66 kcal)              | 0                                   | 350 vs 290                                 | -3.4                                                    | 95%                           |       |
| Birch et                                    | 20          | 7 M / 13 F,                                    | X                               | 150 mL water with 102 mg                                                                            | 30                                  | 353 vs 300                                 | -10.4                                                   | 84%                           |       |



| <b>Children</b>                          | <b>Sample size</b> | <b>Gender, age (y)</b><br><br><b>(mean, SD/SEM or range)</b> | <b>Weight status, restraint status</b> | <b>LES and comparison preloads</b>                                                             | <b>Preload to test meal interval (min)</b> | <b>Intake test meal (kcal), LES vs comparison</b> | <b>Δ cumulative intake (kcal), LES minus comparison (kcal)</b> | <b>COMPX (energy compensation %)</b> | <b>Notes</b>                                               |
|------------------------------------------|--------------------|--------------------------------------------------------------|----------------------------------------|------------------------------------------------------------------------------------------------|--------------------------------------------|---------------------------------------------------|----------------------------------------------------------------|--------------------------------------|------------------------------------------------------------|
| <b>Reference</b>                         |                    |                                                              |                                        |                                                                                                |                                            |                                                   |                                                                |                                      |                                                            |
| al. <sup>(96)</sup><br>(Exp. 2)          |                    | 3 y                                                          | X                                      | aspartame (11 kJ, 2.6 kcal) or 16 g sucrose (276 kJ, 66 kcal)                                  |                                            |                                                   |                                                                |                                      |                                                            |
| Birch et al. <sup>(96)</sup><br>(Exp. 2) | 20                 | 7 M / 13 F,<br>3 y                                           | X<br>X                                 | 150 mL water with 102 mg aspartame (11 kJ, 2.6 kcal) or 16 g sucrose (276 kJ, 66 kcal)         | 60                                         | 346 vs 317                                        | -34.4                                                          | 46%                                  |                                                            |
| Gheller et al. <sup>(97)</sup>           | 22                 | 22 M / 0 F<br>12 y                                           | OW and<br>OB                           | 250 mL orange Kool-Aid with 150 mg sucralose (0 kJ, 0 kcal) or 50 g glucose (837 kJ, 200 kcal) | 30                                         | 1093 vs 1021                                      | -128                                                           | 36%                                  | No video-game playing during preload to test meal interval |
| Gheller et al. <sup>(97)</sup>           | 22                 | 22 M / 0 F<br>12 y                                           | OW and<br>OB                           | 250 mL orange Kool-Aid with 150 mg sucralose (0 kJ, 0 kcal) or 50 g glucose (837 kJ, 200 kcal) | 30                                         | 1187 vs 1054                                      | -67                                                            | 67%                                  | Video-game playing during preload to test meal interval    |
| Branton et al. <sup>(98)</sup>           | 19                 | 19 M / 0 F<br>12 y                                           | NW                                     | 250 mL orange Kool-Aid with 150 mg sucralose (0 kJ, 0 kcal) or 50 g glucose (837 kJ, 200 kcal) | 30                                         | 977 vs 770                                        | 7                                                              | 104%                                 | No video-game playing during preload to test meal interval |

| <b>Children</b>                                  | <b>Sample size</b> | <b>Gender, age (y)</b><br><br><b>(mean, SD/SEM or range)</b> | <b>Weight status, restraint status</b> | <b>LES and comparison preloads</b>                                                                 | <b>Preload to test meal interval (min)</b> | <b>Intake test meal (kcal), LES vs comparison</b> | <b>Δ cumulative intake (kcal), LES minus comparison (kcal)</b> | <b>COMPX (energy compensation %)</b> | <b>Notes</b> |
|--------------------------------------------------|--------------------|--------------------------------------------------------------|----------------------------------------|----------------------------------------------------------------------------------------------------|--------------------------------------------|---------------------------------------------------|----------------------------------------------------------------|--------------------------------------|--------------|
| <b>Reference</b>                                 |                    |                                                              |                                        |                                                                                                    |                                            |                                                   |                                                                |                                      |              |
| Branton et al. <sup>(98)</sup>                   | 19                 | 19 M / 0 F<br>12 y                                           | NW                                     | 250 mL orange Kool-Aid with 150 mg sucralose (0 kJ, 0 kcal) or 50 g glucose (837 kJ, 200 kcal)     | 30                                         | 881 vs 749                                        | 68                                                             | 66%                                  |              |
| Van Engelen et al. <sup>(99)</sup><br>(Exp. 1)   | 15                 | 15 M / 0 F<br>12 y                                           | NW                                     | 250 mL orange Kool-Aid with 150 mg sucralose (0 kJ, 0 kcal) or 50 g glucose (837 kJ, 200 kcal)     | 60                                         | 1127 vs 975                                       | -48                                                            | 76%                                  |              |
| Van Engelen et al. <sup>(99)</sup><br>(Exp. 1)   | 15                 | 15 M / 0 F<br>12 y                                           | NW                                     | 250 ml orange Kool-Aid with 150 mg sucralose (0 kJ, 0 kcal) or 50 g sucrose (837 kJ, 200 kcal)     | 60                                         | 1127 vs 1074                                      | -147                                                           | 27%                                  |              |
| Van Engelen et al. <sup>(99)</sup><br>(Exp. 1)   | 15                 | 15 M / 0 F<br>12 y                                           | NW                                     | 250 ml orange Kool-Aid with 150 mg sucralose (0 kJ, 0 kcal) or 50 g HFCS-55 (837 kJ, 200 kcal)     | 60                                         | 1127 vs 1075                                      | -148                                                           | 26%                                  |              |
| Hetherington et al. <sup>(100)</sup><br>(Exp. 1) | 15                 | 7 M / 8 F,<br>2-5 y                                          | X<br>X                                 | 100 g raspberry dessert with 0.025 g aspartame (25 kJ, 6 kcal) or 17.2 g sucrose (305 kJ, 73 kcal) | 120                                        | 572 vs 488                                        | 17                                                             | 125%                                 |              |
| Hetherington et al. <sup>(100)</sup><br>(Exp. 1) | 10                 | 5 M / 5 F,<br>7-10 y                                         | X<br>X                                 | 100 g rasbberry dessert with 0.025 g aspartame (25 kJ, 6 kcal) or 17.2 g sucrose (305 kJ, 73 kcal) | 120                                        | 549 vs 645                                        | -163                                                           | -143%                                |              |

| <b>Children</b>                               | <b>Sample size</b> | <b>Gender, age (y)</b><br><br><b>(mean, SD/SEM or range)</b> | <b>Weight status, restraint status</b> | <b>LES and comparison preloads</b>                                                                                                            | <b>Preload to test meal interval (min)</b> | <b>Intake test meal (kcal), LES vs comparison</b> | <b>Δ cumulative intake (kcal), LES minus comparison (kcal)</b> | <b>COMPX (energy compensation %)</b> | <b>Notes</b>                       |
|-----------------------------------------------|--------------------|--------------------------------------------------------------|----------------------------------------|-----------------------------------------------------------------------------------------------------------------------------------------------|--------------------------------------------|---------------------------------------------------|----------------------------------------------------------------|--------------------------------------|------------------------------------|
| <b>Reference</b>                              |                    |                                                              |                                        |                                                                                                                                               |                                            |                                                   |                                                                |                                      |                                    |
| Hetherington et al. <sup>(100)</sup> (Exp. 2) | 19                 | 10 M / 9 F, 2-5 y                                            | X<br>X                                 | 150 g raspberry dessert with 0.037 g aspartame (25 kJ, 9 kcal) or 25.8 g sucrose (458 kJ, 109 kcal)                                           | 120                                        | 480 vs 410                                        | -30                                                            | 70%                                  |                                    |
| Hetherington et al. <sup>(100)</sup> (Exp. 2) | 12                 | 6 M / 6 F, 7-10 y                                            | X<br>X                                 | 225 g raspberry dessert with 0.056 g aspartame (56 kJ, 13.5 kcal) or 38.7 g sucrose (686 kJ, 164 kcal)                                        | 120                                        | 430 vs 395                                        | -116                                                           | 23%                                  |                                    |
| Wilson et al. <sup>(101)</sup>                | 135                | 63 M / 72 F, 1.5-5.5 y                                       | NW<br>X                                | 1.1 L chocolate milk with aspartame (345 kJ, 83 kcal) or 1.3 L chocolate milk with sucrose (560 kJ, 134 kcal) - with macaroni (meal #1)       | 0                                          | 242 vs 252                                        | -60                                                            | -18%                                 | each condition was conducted twice |
| Wilson et al. <sup>(101)</sup>                | 135                | 63 M / 72 F, 1.5-5.5 y                                       | NW<br>X                                | 1.5 L chocolate milk with aspartame (389 kJ, 93 kcal) or 1.3 L chocolate milk with sucrose (581 kJ, 139 kcal) - with scrambled eggs (meal #2) | 0                                          | 206 vs 214                                        | -55                                                            | -20%                                 | each condition was conducted twice |

| <b>Children</b>                    | <b>Sample size</b> | <b>Gender, age (y)</b><br><br><b>(mean, SD/SEM or range)</b> | <b>Weight status, restraint status</b> | <b>LES and comparison preloads</b>                                                                                                                      | <b>Preload to test meal interval (min)</b> | <b>Intake test meal (kcal), LES vs comparison</b> | <b>Δ cumulative intake (kcal), LES minus comparison (kcal)</b> | <b>COMPX (energy compensation %)</b> | <b>Notes</b>                         |
|------------------------------------|--------------------|--------------------------------------------------------------|----------------------------------------|---------------------------------------------------------------------------------------------------------------------------------------------------------|--------------------------------------------|---------------------------------------------------|----------------------------------------------------------------|--------------------------------------|--------------------------------------|
| <b>Reference</b>                   |                    |                                                              |                                        |                                                                                                                                                         |                                            |                                                   |                                                                |                                      |                                      |
| Wilson et al. <sup>(101)</sup>     | 135                | 63 M / 72 F, 1.5-5.5 y                                       | NW<br>X                                | 1.1 L chocolate milk with aspartame (345 kJ, 83 kcal) or 1.3 L chocolate milk with sucrose (581 kJ, 139 kcal) - with spaghetti and meat sauce (meal #3) | 0                                          | 204 vs 209                                        | -51                                                            | 9%                                   | each condition was conducted twice x |
| Wilson et al. <sup>(101)</sup>     | 135                | 63 M / 72 F, 1.5-5.5 y                                       | NW<br>X                                | 1.5 L chocolate milk with aspartame (389 kJ, 93 kcal) or 1.5 L chocolate milk with sucrose (648 kJ, 155 kcal) - with grilled cheese sandwich (meal #4)  | 0                                          | 241 vs 248                                        | -55                                                            | 11%                                  | each condition was conducted twice   |
| Bellissimo et al. <sup>(102)</sup> | 14                 | 14 M / 0 F, 9-14 y                                           | 11 NW/ 1 OW/ 2 OB<br>Non-dieting       | 250 mL water with sucralose (0 kJ) matched for sweetness with 1.0g/kg BW glucose (mean 836 kJ, 200 kcal)                                                | 30                                         | 1332 vs 1097                                      | 35                                                             | 118%                                 | 'No TV'-condition only               |
| Bellissimo et al. <sup>(103)</sup> | 14                 | 14 M / 0 F, 9-14 y                                           | 14 NW<br>Non-dieting                   | 250 mL water with sucralose (0 kJ) matched for sweetness with 1.0g/kg BW glucose (mean 836 kJ, 200 kcal)                                                | 30                                         | 1082 vs 893                                       | -11.2                                                          | 95%                                  |                                      |

| <b>Children</b>               | <b>Sample size</b> | <b>Gender, age (y)</b><br><br><b>(mean, SD/SEM or range)</b> | <b>Weight status, restraint status</b> | <b>LES and comparison preloads</b>                                                                     | <b>Preload to test meal interval (min)</b> | <b>Intake test meal (kcal), LES vs comparison</b> | <b>Δ cumulative intake (kcal), LES minus comparison (kcal)</b> | <b>COMPX (energy compensation %)</b> | <b>Notes</b> |
|-------------------------------|--------------------|--------------------------------------------------------------|----------------------------------------|--------------------------------------------------------------------------------------------------------|--------------------------------------------|---------------------------------------------------|----------------------------------------------------------------|--------------------------------------|--------------|
| <b>Reference</b>              |                    |                                                              |                                        |                                                                                                        |                                            |                                                   |                                                                |                                      |              |
| Patel et al. <sup>(104)</sup> | 29                 | 29 M / 0 F, 9-14 y                                           | Mean weight 51 kg Non-dieting          | 250 mL water with sucralose (0 kcal) matched for sweetness with 0.75g/kg BW glucose (640 kJ, 153 kcal) | 30                                         | 1008 vs 848                                       | 7                                                              | 105%                                 |              |
| Patel et al. <sup>(104)</sup> | 29                 | 0 M / 29 F, 9-14 y                                           | Mean weight 51 kg Non-dieting          | 250 mL water with sucralose (0 kcal) matched for sweetness with 0.75g/kg BW glucose (640 kJ, 153 kcal) | 30                                         | 841 vs 662                                        | 26                                                             | 117%                                 |              |
| Patel et al. <sup>(104)</sup> | 29                 | 29 M / 0 F, 9-14 y                                           | Mean weight 51 kg Non-dieting          | 250 mL water with sucralose (0 kcal) matched for sweetness with 0.75g/kg BW glucose (640 kJ, 153 kcal) | 60                                         | 889 vs 927                                        | -191                                                           | -25%                                 |              |
| Patel et al. <sup>(104)</sup> | 29                 | 0 M / 29 F, 9-14 y                                           | Mean weight 51 kg Non-dieting          | 250 mL water with sucralose (0 kcal) matched for sweetness with 0.75g/kg BW glucose (640 kJ, 153 kcal) | 60                                         | 765 vs 695                                        | -83                                                            | 46%                                  |              |

| <b>Children</b>                        | <b>Sample size</b> | <b>Gender, age (y)</b><br><br><b>(mean, SD/SEM or range)</b> | <b>Weight status, restraint status</b> | <b>LES and comparison preloads</b>                                                                     | <b>Preload to test meal interval (min)</b> | <b>Intake test meal (kcal), LES vs comparison</b> | <b>Δ cumulative intake (kcal), LES minus comparison (kcal)</b> | <b>COMPX (energy compensation %)</b> | <b>Notes</b>        |
|----------------------------------------|--------------------|--------------------------------------------------------------|----------------------------------------|--------------------------------------------------------------------------------------------------------|--------------------------------------------|---------------------------------------------------|----------------------------------------------------------------|--------------------------------------|---------------------|
| <b>Reference</b>                       |                    |                                                              |                                        |                                                                                                        |                                            |                                                   |                                                                |                                      |                     |
| Patel et al. <sup>(104)</sup>          | 25                 | 0 M / 25 F, 9-14 y                                           | 21 NW/ 3 OW/ 1 OB Non-dieting          | 250 mL water with sucralose (0 kcal) matched for sweetness with 1.0 g/kg BW glucose (706 kJ, 169 kcal) | 30                                         | 940 vs 779                                        | -8                                                             | 95%                                  |                     |
| Tamam et al. <sup>(105)</sup> (Exp. 1) | 18                 | 18 M / 0 F, 9-14 y                                           | NW Non-dieting                         | 250 mL water with sucralose (0 kcal) matched for sweetness with 1.0 g/kg BW glucose (744 kJ, 178 kcal) | 30                                         | 910 vs 763                                        | -31                                                            | 83%                                  | Sedentary condition |
| Tamam et al. <sup>(105)</sup> (Exp. 1) | 17                 | 17 M / 0 F, 9-14 y                                           | OW and OB Non-dieting                  | 250 mL water with sucralose (0 kcal) matched for sweetness with 1.0 g/kg BW glucose (853 kJ, 204 kcal) | 30                                         | 1182 vs 994                                       | 10                                                             | 106%                                 | Sedentary condition |
| Tamam et al. <sup>(105)</sup> (Exp. 2) | 19                 | 19 M / 0 F, 9-14 y                                           | NW Non-dieting                         | 250 mL water with sucralose (0 kcal) matched for sweetness with 1.0 g/kg BW glucose (782 kJ, 187 kcal) | 30                                         | 1064 vs 807                                       | 70                                                             | 137%                                 |                     |
| Booth et al. <sup>(106)</sup>          | 12                 | 11 M / 1 F, X                                                | X X                                    | 100 ml drink with 50 g glucose ( 184 kcal) or with saccharin and cyclamate (0 kJ, 0 kcal)              | 0                                          | 352 vs 295                                        | -143                                                           | 29%                                  |                     |

| <b>Children</b>                | <b>Sample size</b> | <b>Gender, age (y)</b><br><br><b>(mean, SD/SEM or range)</b>  | <b>Weight status, restraint status</b> | <b>LES and comparison preloads</b>                                                             | <b>Preload to test meal interval (min)</b> | <b>Intake test meal (kcal), LES vs comparison</b> | <b>Δ cumulative intake (kcal), LES minus comparison (kcal)</b> | <b>COMPX (energy compensation %)</b> | <b>Notes</b>                                 |
|--------------------------------|--------------------|---------------------------------------------------------------|----------------------------------------|------------------------------------------------------------------------------------------------|--------------------------------------------|---------------------------------------------------|----------------------------------------------------------------|--------------------------------------|----------------------------------------------|
| <b>Reference</b>               |                    |                                                               |                                        |                                                                                                |                                            |                                                   |                                                                |                                      |                                              |
| Booth et al. <sup>(106)</sup>  | 12                 | 11 M / 1 F,<br>X                                              | X<br>X                                 | 100 ml drink with 50 g glucose ( kJ, 184 kcal) or with saccharin and cyclamate (0 kJ, 0 kcal)  | 20                                         | 322 vs 211                                        | -89                                                            | 56%                                  |                                              |
| Booth et al. <sup>(106)</sup>  | 12                 | 11 M / 1 F,<br>X                                              | X<br>X                                 | 100 ml drink with 50 g glucose ( kJ, 184 kcal) or with saccharin and cyclamate (0 kJ, 0 kcal)  | 180                                        | 201 vs 158                                        | -157                                                           | 22%                                  |                                              |
| Brala & Hagen <sup>(107)</sup> | 34                 | M/ F (not specified, about half-half), undergraduate students | NW<br>X                                | 240 ml chocolate milk with 6 g aspartame (828 kJ, 198 kcal) or 60 g glucose (1795kJ, 429 kcal) | 75                                         | 643 vs 400                                        | 12                                                             | 105%                                 | Rinse with sweetness blocker (gymnemic acid) |
|                                |                    |                                                               |                                        |                                                                                                |                                            |                                                   |                                                                |                                      | n=16 sucrose, n=18 aspartame                 |

| <b>Adults</b>                      | <b>Sample size</b> | <b>Gender, age (y)</b><br><br><b>(mean, SD/SEM or range)</b>  | <b>Weight status, restraint status</b> | <b>LES and comparison preloads</b>                                                             | <b>Preload to test meal interval (min)</b> | <b>Intake test meal (kcal), LES vs comparison</b> | <b>Δ intake preload + test meal (kcal), LES minus comparison (kcal)</b> | <b>COMPX (energy compensation %)</b> | <b>Notes</b>                                       |
|------------------------------------|--------------------|---------------------------------------------------------------|----------------------------------------|------------------------------------------------------------------------------------------------|--------------------------------------------|---------------------------------------------------|-------------------------------------------------------------------------|--------------------------------------|----------------------------------------------------|
| <b>Reference</b>                   |                    |                                                               |                                        |                                                                                                |                                            |                                                   |                                                                         |                                      |                                                    |
| Brala & Hagen <sup>(107)</sup>     | 34                 | M/ F (not specified, about half-half), undergraduate students | NW<br>X                                | 240 ml chocolate milk with 6 g aspartame (828kJ, 198 kcal) or 60 g glucose (1795 kJ, 429 kcal) | 75                                         | 623 vs 595                                        | -203                                                                    | 12%                                  | Rinse with tea<br><br>n=17 sucrose, n=17 aspartame |
| Rogers et al. <sup>(108)</sup>     | 33                 | 25 M / 8 F, 19 y                                              | NW<br>NR                               | 200 ml of tap water with 240 mg ace-K (0 kJ) or 50 g glucose (786 kJ, 188 kcal)                | 60                                         | 1395 vs 1271                                      | -64                                                                     | 66%                                  |                                                    |
| Rogers et al. <sup>(108)</sup>     | 33                 | 25 M / 8 F, 19 y                                              | NW<br>NR                               | 200 ml of tap water with 145 mg sacharine (o kJ) or 50 g glucose (786 kJ, 188 kcal)            | 60                                         | 1388 vs 1271                                      | -71                                                                     | 62%                                  |                                                    |
| Rogers et al. <sup>(108)</sup>     | 33                 | 25 M / 8 F, 19 y                                              | NW<br>NR                               | 200 ml of tap water with 162 mg aspartame (13 kJ, 3 kcal) or 50 g glucose (786 kJ, 188 kcal)   | 60                                         | 1333 vs 1271                                      | -123                                                                    | 33%                                  |                                                    |
| Rogers & Blundell <sup>(109)</sup> | 21                 | 4 M / 17 F, 18-29 y                                           | NW<br>NR                               | Yogurt with saccharin (548 kJ, 131 kcal) or glucose (1234 kJ, 295                              | 60                                         | 949 vs 741                                        | 44                                                                      | 127%                                 |                                                    |



| <b>Adults</b>                 | <b>Sample size</b> | <b>Gender, age (y)</b><br><br>(mean, SD/SEM<br>or range) | <b>Weight status, restraint status</b> | <b>LES and comparison preloads</b>                                                                                           | <b>Preload to test meal interval (min)</b> | <b>Intake test meal (kcal), LES vs comparison</b> | <b>Δ intake preload + test meal (kcal), LES minus comparison (kcal)</b> | <b>COMPX (energy compensation %)</b> | <b>Notes</b>                                            |
|-------------------------------|--------------------|----------------------------------------------------------|----------------------------------------|------------------------------------------------------------------------------------------------------------------------------|--------------------------------------------|---------------------------------------------------|-------------------------------------------------------------------------|--------------------------------------|---------------------------------------------------------|
|                               |                    |                                                          |                                        | kcal)                                                                                                                        |                                            |                                                   |                                                                         |                                      |                                                         |
| Rolls et al. <sup>(110)</sup> | 16                 | 8 M / 8 F, 18-35 y                                       | NW<br>NR                               | 347 g of jello with aspartame (145 kJ, 35 kcal) or 318 g jello with sucrose (799 kJ, 191 kcal)                               | 120                                        | 1103 vs 1062                                      | -115                                                                    | 26%                                  | Participants informed about preload energy content      |
| Rolls et al. <sup>(110)</sup> | 16                 | 8 M / 8 F, 18-35 y                                       | NW<br>NR                               | 389 g of chocolate pudding with aspartame (1628 kJ, 389 kcal) or 344 g of chocolate pudding with sucrose (2303 kJ, 551 kcal) | 120                                        | 986 vs 856                                        | -32                                                                     | 80%                                  | Participants informed about preload energy content      |
| Rolls et al. <sup>(110)</sup> | 16                 | 8 M / 8 F, 18-35 y                                       | NW<br>NR                               | 287 g of jello with aspartame (121 kJ, 29 kcal) or 294 g jello with sucrose (739 kJ, 177 kcal)                               | 120                                        | 1057 vs 938                                       | -29                                                                     | 80%                                  | Participants not informed about preload energy content. |
| Rolls et                      | 16                 | 8 M / 8 F,                                               | NW                                     | 289 g of chocolate pudding with                                                                                              | 120                                        | 910 vs 816                                        | -112                                                                    | 46%                                  | Participants not informed                               |

| <b>Adults</b>                 | <b>Sample size</b> | <b>Gender, age (y)</b><br><br><b>(mean, SD/SEM or range)</b> | <b>Weight status, restraint status</b> | <b>LES and comparison preloads</b>                                                                               | <b>Preload to test meal interval (min)</b> | <b>Intake test meal (kcal), LES vs comparison</b> | <b>Δ intake preload + test meal (kcal), LES minus comparison (kcal)</b> | <b>COMPX (energy compensation %)</b> | <b>Notes</b>                  |
|-------------------------------|--------------------|--------------------------------------------------------------|----------------------------------------|------------------------------------------------------------------------------------------------------------------|--------------------------------------------|---------------------------------------------------|-------------------------------------------------------------------------|--------------------------------------|-------------------------------|
| <b>Reference</b>              |                    |                                                              |                                        |                                                                                                                  |                                            |                                                   |                                                                         |                                      |                               |
| al. <sup>(110)</sup>          |                    | 18-35 y                                                      | NR                                     | aspartame (1209 kJ, 289 kcal) or 310 g of chocolate pudding with sucrose (2072 kJ, 495 kcal)                     |                                            |                                                   |                                                                         |                                      | about preload energy content. |
| Rodin et al. <sup>(111)</sup> | 6                  | 6 M / 0 F, 22-50 y                                           | OW<br>X                                | 500 ml of lemon flavored water with 0.25 g of aspartame (15 kJ, 3.7 kcal) or 50 g of fructose (854 kJ, 204 kcal) | 50                                         | 1597 vs 1191                                      | 206                                                                     | 203%                                 |                               |
| Rodin et al. <sup>(111)</sup> | 6                  | 6 M / 0 F, 22-50 y                                           | OW<br>X                                | 500 ml of lemon flavored water with 0.25 g of aspartame (15 kJ, 3.7 kcal) or 50 g of glucose (854 kJ, 204 kcal)  | 50                                         | 1597 vs 1267                                      | 130                                                                     | 168%                                 |                               |
| Rodin et al. <sup>(111)</sup> | 4                  | 4 M / 0 F, 22-50 y                                           | NW<br>X                                | 500 ml of lemon flavored water with 0.25 g of aspartame (15 kJ, 3.7 kcal) or 50 g of fructose (854 kJ, 204 kcal) | 50                                         | 1217 vs 794                                       | 223                                                                     | 211%                                 |                               |
| Rodin et al. <sup>(111)</sup> | 4                  | 4 M / 0 F, 22-50 y                                           | NW<br>X                                | 500 ml of lemon flavored water with 0.25 g of aspartame (15 kJ, 3.7 kcal) or 50 g of glucose                     | 50                                         | 1217 vs 1142                                      | -125                                                                    | 37%                                  |                               |

| <b>Adults</b>                 | <b>Sample size</b> | <b>Gender, age (y)</b><br><br><b>(mean, SD/SEM or range)</b> | <b>Weight status, restraint status</b> | <b>LES and comparison preloads</b>                                                                               | <b>Preload to test meal interval (min)</b> | <b>Intake test meal (kcal), LES vs comparison</b> | <b>Δ intake preload + test meal (kcal), LES minus comparison (kcal)</b> | <b>COMPX (energy compensation %)</b> | <b>Notes</b> |
|-------------------------------|--------------------|--------------------------------------------------------------|----------------------------------------|------------------------------------------------------------------------------------------------------------------|--------------------------------------------|---------------------------------------------------|-------------------------------------------------------------------------|--------------------------------------|--------------|
|                               |                    |                                                              |                                        | (854 kJ, 204 kcal)                                                                                               |                                            |                                                   |                                                                         |                                      |              |
| Rodin et al. <sup>(111)</sup> | 6                  | 0 M / 6 F, 22-50 y                                           | OW<br>X                                | 500 ml of lemon flavored water with 0.25 g of aspartame (15 kJ, 3.7 kcal) or 50 g of fructose (854 kJ, 204 kcal) | 50                                         | 1204 vs 854                                       | 150                                                                     | 175%                                 |              |
| Rodin et al. <sup>(111)</sup> | 6                  | 0 M / 6 F, 22-50 y                                           | OW<br>X                                | 500 ml of lemon flavored water with 0.25 g of aspartame (15 kJ, 3.7 kcal) or 50 g of glucose (854 kJ, 204 kcal)  | 50                                         | 1204 vs 1150                                      | -146                                                                    | 27%                                  |              |
| Rodin et al. <sup>(111)</sup> | 4                  | 4 M / 0 F, 22-50 y                                           | NW<br>X                                | 500 ml of lemon flavored water with 0.25 g of aspartame (15 kJ, 3.7 kcal) or 50 g of fructose (854 kJ, 204 kcal) | 50                                         | 978 vs 813                                        | -35                                                                     | 83%                                  |              |
| Rodin et al. <sup>(111)</sup> | 4                  | 4 M / 0 F, 22-50 y                                           | NW<br>X                                | 500 ml of lemon flavored water with 0.25 g of aspartame (15 kJ, 3.7 kcal) or 50 g of glucose (854 kJ, 204 kcal)  | 50                                         | 978 vs 916                                        | -138                                                                    | 31%                                  |              |

| <b>Adults</b>                  | <b>Sample size</b> | <b>Gender, age (y)</b><br><br><b>(mean, SD/SEM or range)</b> | <b>Weight status, restraint status</b> | <b>LES and comparison preloads</b>                                                  | <b>Preload to test meal interval (min)</b> | <b>Intake test meal (kcal), LES vs comparison</b> | <b>Δ intake preload + test meal (kcal), LES minus comparison (kcal)</b> | <b>COMPX (energy compensation %)</b> | <b>Notes</b>                                                    |
|--------------------------------|--------------------|--------------------------------------------------------------|----------------------------------------|-------------------------------------------------------------------------------------|--------------------------------------------|---------------------------------------------------|-------------------------------------------------------------------------|--------------------------------------|-----------------------------------------------------------------|
| <b>Reference</b>               |                    |                                                              |                                        |                                                                                     |                                            |                                                   |                                                                         |                                      |                                                                 |
| Rogers et al. <sup>(112)</sup> | 18                 | M / F (not specified), 18-25                                 | NW, non-dieting                        | Yogurt with 200 mg aspartame (548 kJ, 131 kcal) or 50 g glucose (1233 kJ, 295 kcal) | 60                                         | 878 vs 734                                        | -20                                                                     | 88%                                  | Subjects not informed about sweetener or kcal content of yogurt |
| Rogers et al. <sup>(112)</sup> | 23                 | M / F (not specified), 18-25                                 | NW, non-dieting                        | Yogurt with 200 mg aspartame (548 kJ, 131 kcal) or 50 g glucose (1233 kJ, 295 kcal) | 60                                         | 1130 vs 974                                       | -8                                                                      | 95%                                  | Subjects informed about sweetener or kcal content of yogurt     |
| Rolls et al. <sup>(113)</sup>  | 13                 | 13 M / 0 F, 25 (4) y                                         | NW Non-dieting                         | 237 ml drink with 0.11 g aspartame (21 kJ, 5 kcal) or sucrose (347 kJ, 83 kcal)     | 0                                          | 1022 vs 1138                                      | -194                                                                    | 149%                                 | Preload consumed with the meal                                  |
| Rolls et al. <sup>(113)</sup>  | 13                 | 13 M / 0 F, 25 (4) y                                         | NW Non-dieting                         | 473 ml drink 0.22 gaspartame (42 kJ, 10 kcal) or sucrose (694 kJ, 166 kcal)         | 0                                          | 1113 vs 1046                                      | -89                                                                     | 43%                                  | Preload consumed with the meal                                  |
| Rolls et                       | 13                 | 13 M / 0 F,                                                  | NW Non-                                | 237 ml drink with 0.11 g aspartame (21 kJ, 5                                        | 30                                         | 1093 vs                                           | -83                                                                     | -6%                                  |                                                                 |

| <b>Adults</b>                 | <b>Sample size</b> | <b>Gender, age (y)</b><br><br><b>(mean, SD/SEM or range)</b> | <b>Weight status, restraint status</b> | <b>LES and comparison preloads</b>                                                                                        | <b>Preload to test meal interval (min)</b> | <b>Intake test meal (kcal), LES vs comparison</b> | <b>Δ intake preload + test meal (kcal), LES minus comparison (kcal)</b> | <b>COMPX (energy compensation %)</b> | <b>Notes</b> |
|-------------------------------|--------------------|--------------------------------------------------------------|----------------------------------------|---------------------------------------------------------------------------------------------------------------------------|--------------------------------------------|---------------------------------------------------|-------------------------------------------------------------------------|--------------------------------------|--------------|
| <b>Reference</b>              |                    |                                                              |                                        |                                                                                                                           |                                            |                                                   |                                                                         |                                      |              |
| al. <sup>(113)</sup>          |                    | 25 (4) y                                                     | diETING                                | kcal) or sucrose (347 kJ, 83 kcal)                                                                                        |                                            | 1098                                              |                                                                         |                                      |              |
| Rolls et al. <sup>(113)</sup> | 13                 | 13 M / 0 F, 25 (4) y                                         | NW Non-dieting                         | 473 ml drink 0.22 gaspartame (42 kJ, 10 kcal) or sucrose (694 kJ, 166 kcal)                                               | 30                                         | 1138 vs 1096                                      | -114                                                                    | 27%                                  |              |
| Rolls et al. <sup>(113)</sup> | 13                 | 13 M / 0 F, 25 (4) y                                         | NW Non-dieting                         | 237 ml drink with 0.11 g aspartame (21 kJ, 5 kcal) or sucrose (347 kJ, 83 kcal)                                           | 60                                         | 1211 vs 1104                                      | -29                                                                     | 137%                                 |              |
| Rolls et al. <sup>(113)</sup> | 13                 | 13 M / 0 F, 25 (4) y                                         | NW Non-dieting                         | 473 ml drink 0.22 gaspartame (42 kJ, 10 kcal) or sucrose (694 kJ, 166 kcal)                                               | 60                                         | 1140 vs 1134                                      | -150                                                                    | 4%                                   |              |
| Canty & Chan <sup>(114)</sup> | 20                 | 20 M / 0 F, 29 (1) y, 23-37 y                                | NW NR                                  | 200 ml of cherry flavored drink with 112 mg aspartame (not reported; 0 kcal?) or 20 g of sucrose (not reported; 80 kcal?) | 60                                         | 606 vs 504                                        | 22                                                                      | 128%                                 |              |

| <b>Adults</b>                      | <b>Sample size</b> | <b>Gender, age (y)</b><br><br><b>(mean, SD/SEM or range)</b> | <b>Weight status, restraint status</b> | <b>LES and comparison preloads</b>                                                                                     | <b>Preload to test meal interval (min)</b> | <b>Intake test meal (kcal), LES vs comparison</b> | <b>Δ intake preload + test meal (kcal), LES minus comparison (kcal)</b> | <b>COMPX (energy compensation %)</b> | <b>Notes</b> |
|------------------------------------|--------------------|--------------------------------------------------------------|----------------------------------------|------------------------------------------------------------------------------------------------------------------------|--------------------------------------------|---------------------------------------------------|-------------------------------------------------------------------------|--------------------------------------|--------------|
| <b>Reference</b>                   |                    |                                                              |                                        |                                                                                                                        |                                            |                                                   |                                                                         |                                      |              |
| Canty & Chan <sup>(114)</sup>      | 20                 | 20 M / 0 F, 29 (1) y, 23-37 y                                | NW<br>NR                               | 200 ml of cherry flavored drink with 67.5 mg saccharine (energy not reported) or 20 g of sucrose (energy not reported) | 60                                         | 568 vs 504                                        | -16                                                                     | 80%                                  |              |
| Drewnowski et al. <sup>(115)</sup> | 12                 | 0 M 12 F, 34 y                                               | OB<br>R                                | 500 g of cream cheese with aspartame (1255 kJ, 300 kcal) or aspartame + maltodextrin (2929 kJ, 700 kcal)               | 180                                        | 1255 vs 1180                                      | -325                                                                    | 19%                                  |              |
| Drewnowski et al. <sup>(116)</sup> | 12                 | 0 M / 12 F, 25 y                                             | NW<br>NR                               | 500 g of cream cheese with aspartame (1255 kJ, 300 kcal) or sucrose (2929 kJ, 700 kcal)                                | 180                                        | 584 vs 535                                        | -351                                                                    | 12%                                  |              |
| Drewnowski et al. <sup>(116)</sup> | 12                 | 12 M / 0 F, 26 y                                             | NW<br>NR                               | 500 g of cream cheese with aspartame (1255 kJ, 300 kcal) or sucrose (2929 kJ, 700 kcal)                                | 0                                          | 900 vs 817                                        | -317                                                                    | 21%                                  |              |
| Guss et al. <sup>(117)</sup>       | 8                  | 0 M / 8 F, 20 y                                              | NW<br>X                                | 500 ml lemon flavored drink with fructose 1% + 250 mg aspartame (88 kJ, 21 kcal) or with                               | 30                                         | 679 vs 536                                        | -36                                                                     | 80%                                  |              |

| <b>Adults</b>                | <b>Sample size</b> | <b>Gender, age (y)</b><br><br><b>(mean, SD/SEM or range)</b> | <b>Weight status, restraint status</b> | <b>LES and comparison preloads</b>                                                                                       | <b>Preload to test meal interval (min)</b> | <b>Intake test meal (kcal), LES vs comparison</b> | <b>Δ intake preload + test meal (kcal), LES minus comparison (kcal)</b> | <b>COMPX (energy compensation %)</b> | <b>Notes</b> |
|------------------------------|--------------------|--------------------------------------------------------------|----------------------------------------|--------------------------------------------------------------------------------------------------------------------------|--------------------------------------------|---------------------------------------------------|-------------------------------------------------------------------------|--------------------------------------|--------------|
| <b>Reference</b>             |                    |                                                              |                                        |                                                                                                                          |                                            |                                                   |                                                                         |                                      |              |
|                              |                    |                                                              |                                        | fructose 10% (837 kJ, 200 kcal)                                                                                          |                                            |                                                   |                                                                         |                                      |              |
| Guss et al. <sup>(117)</sup> | 8                  | 0 M / 8 F, 22 y                                              | NW<br>X                                | 500 ml lemon flavored drink with fructose 1% + 250 mg aspartame (88 kJ, 21 kcal) or with fructose 10% (837 kJ, 200 kcal) | 135                                        | 580 vs 524                                        | -123                                                                    | 31%                                  |              |
| Guss et al. <sup>(117)</sup> | 8                  | 0 M / 8 F, 20 y                                              | NW<br>X                                | 500 ml lemon flavored drink with glucose 1% + 250 mg aspartame (88 kJ, 21 kcal) or with fructose 10% (837 kJ, 200 kcal)  | 30                                         | 674 vs 519                                        | -24                                                                     | 87%                                  |              |
| Guss et al. <sup>(117)</sup> | 8                  | 0 M / 8 F, 22 y                                              | NW<br>X                                | 500 ml lemon flavored drink with fructose 1% + 250 mg aspartame (88 kJ, 21 kcal) or with glucose 10% (837 kJ, 200 kcal)  | 135                                        | 520 vs 570                                        | -229                                                                    | -28%                                 |              |

| <b>Adults</b>                        | <b>Sample size</b> | <b>Gender, age (y)</b><br><br><b>(mean, SD/SEM or range)</b> | <b>Weight status, restraint status</b> | <b>LES and comparison preloads</b>                                                                    | <b>Preload to test meal interval (min)</b>   | <b>Intake test meal (kcal), LES vs comparison</b> | <b>Δ intake preload + test meal (kcal), LES minus comparison (kcal)</b> | <b>COMPX (energy compensation %)</b> | <b>Notes</b>                                               |
|--------------------------------------|--------------------|--------------------------------------------------------------|----------------------------------------|-------------------------------------------------------------------------------------------------------|----------------------------------------------|---------------------------------------------------|-------------------------------------------------------------------------|--------------------------------------|------------------------------------------------------------|
| Reid and Hammersley <sup>(118)</sup> | 18                 | 18 M / 0 F, 18-55 y                                          | NW<br>X                                | 568 ml of orange squash with saccharin (42 kJ, 10 kcal) or 40 g sucrose (669 kJ, 160 kcal)            | ≥60, varied, next meal was not fixed in time | 560 vs 614                                        | -204                                                                    | -36%                                 | Between subjects design<br><br>Data recorded in diet diary |
| Reid and Hammersley <sup>(118)</sup> | 11                 | 0 M / 11 F, 18-55 y                                          | NW<br>X                                | 568 ml of orange squash with saccharin (42 kJ, 10 kcal) or 40 g sucrose (669 kJ, 160 kcal)            | ≥60, varied, next meal was not fixed in time | 397 vs 262                                        | -15                                                                     | 90%                                  | Between subjects design. Data recorded in diet diary       |
| Kim & Kissileff <sup>(119)</sup>     | 8                  | 3 M / 5 F, 22 (2) y                                          | NW<br>NR                               | 500 ml of 1%-glucose solution with 260 mg aspartame (84 kJ, 20kcal) vs 15%-glucose (1254 kJ, 300kcal) | 30                                           | 613 vs 465                                        | -132                                                                    | 53%                                  |                                                            |
| Kim & Kissileff <sup>(119)</sup>     | 8                  | 3 M / 5 F, 22 (2) y                                          | NW<br>NR                               | 500 ml of 1%-glucose solution with 260 mg aspartame (84 kJ, 20kcal) vs 15%-glucose (1254 kJ, 300kcal) | 30                                           | 668 vs 517                                        | -129                                                                    | 54%                                  |                                                            |



| <b>Adults</b>                           | <b>Sample size</b> | <b>Gender, age (y)</b><br><br><b>(mean, SD/SEM or range)</b> | <b>Weight status, restraint status</b> | <b>LES and comparison preloads</b>                                                                                | <b>Preload to test meal interval (min)</b>                        | <b>Intake test meal (kcal), LES vs comparison</b> | <b>Δ intake preload + test meal (kcal), LES minus comparison (kcal)</b> | <b>COMPX (energy compensation %)</b> | <b>Notes</b>                                      |
|-----------------------------------------|--------------------|--------------------------------------------------------------|----------------------------------------|-------------------------------------------------------------------------------------------------------------------|-------------------------------------------------------------------|---------------------------------------------------|-------------------------------------------------------------------------|--------------------------------------|---------------------------------------------------|
| <b>Reference</b>                        |                    |                                                              |                                        |                                                                                                                   |                                                                   |                                                   |                                                                         |                                      |                                                   |
| Lavin et al. <sup>(5)</sup>             | 14                 | 0 M / 14 F, students                                         | NW<br>R, non-dieting                   | 4*330 ml lemonade with aspartame (42 kJ or 10 kcal/1320 ml) or sucrose (1381 kJ/1320 ml, 330 kcal/1320 ml)        | Intake during 24h                                                 | 3181 vs, 2775                                     | 86                                                                      | 127%                                 | Beverages served at 09.30, 11.30, 14.00 and 16.00 |
| Beridot – Therond et al. <sup>(4)</sup> | 24                 | 12 M / 12 F, 20-25 y                                         | NW<br>NR                               | 876 ml orange-flavored beverage with aspartame (0 kJ) or 686 ml beverage with sucrose (1296 kJ, 310 kcal)         | 0 to 15                                                           | 803 vs 782                                        | -289                                                                    | 7%                                   | intake continued up to and during lunch           |
| Beridot – Therond et al. <sup>(4)</sup> | 24                 | 12 M / 12 F, 20-25 y                                         | NW<br>NR                               | 541 ml orange-flavored beverage with aspartame (0 kJ, 0 kcal) or 658 ml beverage with sucrose (1099 kJ, 263 kcal) | 0 to 360, continuous ad lib access from end of lunch intill diner | 595 vs 627                                        | -295                                                                    | -12%                                 | intake continued up to and during diner           |
| King et al. <sup>(120)</sup>            | 16                 | 16 M / 0 F, 21 y                                             | NW<br>NR                               | Ad libitum drink with aspartame /ace-K (50 kJ, 12) or sucrose (971 kJ, 232)                                       | 10                                                                | 1520 vs 1331                                      | -31                                                                     | 86%                                  | Preload after exercise                            |
| Melanson et al. <sup>(121)</sup>        | 10                 | 10 M / 0 F, 25 y                                             | NW<br>X                                | 350 g of lemon flavored drink with aspartame (36 kcal) or sucrose (239 kcal)                                      | Not fixed                                                         | 1401 vs 1460                                      | -262                                                                    | -29%                                 |                                                   |

| <b>Adults</b>                        | <b>Sample size</b> | <b>Gender, age (y)</b><br><br><b>(mean, SD/SEM or range)</b> | <b>Weight status, restraint status</b> | <b>LES and comparison preloads</b>                                                                 | <b>Preload to test meal interval (min)</b>  | <b>Intake test meal (kcal), LES vs comparison</b> | <b>Δ intake preload + test meal (kcal), LES minus comparison (kcal)</b> | <b>COMPX (energy compensation %)</b> | <b>Notes</b>                                               |
|--------------------------------------|--------------------|--------------------------------------------------------------|----------------------------------------|----------------------------------------------------------------------------------------------------|---------------------------------------------|---------------------------------------------------|-------------------------------------------------------------------------|--------------------------------------|------------------------------------------------------------|
| <b>Reference</b>                     |                    |                                                              |                                        |                                                                                                    |                                             |                                                   |                                                                         |                                      |                                                            |
| Reid and Hammersley <sup>(122)</sup> | 20                 | 20 M / 0 F, 31 y                                             | NW<br>X                                | 80 g of low fat yogurt with sucrose (859 kJ, 205 kcal) or saccharin (230 kJ, 55 kcal)              | ≥0, varied, next meal was not fixed in time | 1026 vs 688                                       | 551                                                                     | 232%                                 | Between subjects design<br><br>Data recorded in diet diary |
| Reid and Hammersley <sup>(122)</sup> | 20                 | 0 M / 20 F, 30 y                                             | NW<br>X                                | 80 g of low fat yogurt with sucrose (859 kJ, 205 kcal) or saccharin (230 kJ, 55 kcal)              | ≥0, varied, next meal was not fixed in time | 327 vs 305                                        | -153                                                                    | 13%                                  | Between subjects design. Data recorded in diet diary       |
| Holt et al. <sup>(123)</sup>         | 11                 | 11 M / 0 F, 22 (3) y                                         | NW<br>NR                               | 375 ml of diet coca cola + 40 g crushed ice (7 kJ, 2 kcal) or regular coca cola (629 kJ, 150 kcal) | 20                                          | 490 vs 502                                        | -160                                                                    | -8%                                  |                                                            |
| Woodend & Anderson <sup>(124)</sup>  | 14                 | 14 M / 0 F, 24 y                                             | NW / OW<br>Non-dieting                 | 360 ml of beverage preloads with sucralose (0 kJ) or 25 g sucrose (418 kJ, 100kcal)                | 60                                          | 1066 vs 978                                       | -12                                                                     | 88%                                  |                                                            |
| Woodend & Anderson <sup>(124)</sup>  | 14                 | 14 M / 0 F, 24 y                                             | NW / OW<br>Non-dieting                 | 360 ml of beverage preloads with sucralose (0 kJ, 0 kcal) or 50 g sucrose (836 kJ, 200 kcal)       | 60                                          | 1066 vs 978                                       | -112                                                                    | 44%                                  |                                                            |

| <b>Adults</b>                                  | <b>Sample size</b> | <b>Gender, age (y)</b><br><br><b>(mean, SD/SEM or range)</b> | <b>Weight status, restraint status</b> | <b>LES and comparison preloads</b>                                                                                                                               | <b>Preload to test meal interval (min)</b> | <b>Intake test meal (kcal), LES vs comparison</b> | <b>Δ intake preload + test meal (kcal), LES minus comparison (kcal)</b> | <b>COMPX (energy compensation %)</b> | <b>Notes</b> |
|------------------------------------------------|--------------------|--------------------------------------------------------------|----------------------------------------|------------------------------------------------------------------------------------------------------------------------------------------------------------------|--------------------------------------------|---------------------------------------------------|-------------------------------------------------------------------------|--------------------------------------|--------------|
| <b>Reference</b>                               |                    |                                                              |                                        |                                                                                                                                                                  |                                            |                                                   |                                                                         |                                      |              |
| Woodend & Anderson <sup>(124)</sup>            | 14                 | 14 M / 0 F, 24 y                                             | NW / OW<br>Non-dieting                 | 360 ml of beverage preloads with sucralose (0 kJ, 0 kcal) or 75 g sucrose (1254 kJ, 300 kcal)                                                                    | 60                                         | 1066 vs 831                                       | -65                                                                     | 78%                                  |              |
| Van Wymelbeke et al. <sup>(2)</sup>            | 24                 | 12 M / 12 F, 20-25 y                                         | NW<br>X                                | Consumed total over day of 2 l of orange or raspberry flavored beverage with aspartame / saccharin / ace-K (0 kJ, 0 kcal) or sucrose (1672 kJ / l, 400 kcal / l) | 24h intake                                 | 2057 vs 1928                                      | -671                                                                    | 16%                                  |              |
| Delavalle et al. <sup>(125)</sup>              | 44                 | 0 M / 44 F, 25 y                                             | NW / OW<br>NR                          | 360 g of diet cola (0 kJ, 0 kcal) or regular cola (653 kJ, 150 kcal)                                                                                             | 0                                          | 893 vs. 795                                       | -52                                                                     | 65%                                  |              |
| Akhavan & Anderson <sup>(30)</sup><br>(Exp. 1) | 12                 | 12 M/ 0 F, 29 y                                              | NW<br>NR                               | 300 ml water with lemon juice added with sucralose (0 kJ, 0 kcal) or fructose(80%)/ glucose(20%) mix (1254 kJ, 300 kcal)                                         | (min)                                      | 1220 vs 1207                                      | -287                                                                    | 4%                                   |              |

| <b>Adults</b>                                  | <b>Sample size</b> | <b>Gender, age (y)</b><br><br><b>(mean, SD/SEM or range)</b> | <b>Weight status, restraint status</b> | <b>LES and comparison preloads</b>                                                                                       | <b>Preload to test meal interval (min)</b> | <b>Intake test meal (kcal), LES vs comparison</b> | <b>Δ intake preload + test meal (kcal), LES minus comparison (kcal)</b> | <b>COMPX (energy compensation %)</b> | <b>Notes</b>                                                                                   |
|------------------------------------------------|--------------------|--------------------------------------------------------------|----------------------------------------|--------------------------------------------------------------------------------------------------------------------------|--------------------------------------------|---------------------------------------------------|-------------------------------------------------------------------------|--------------------------------------|------------------------------------------------------------------------------------------------|
| <b>Reference</b>                               |                    |                                                              |                                        |                                                                                                                          |                                            |                                                   |                                                                         |                                      |                                                                                                |
| Akhavan & Anderson <sup>(30)</sup><br>(Exp. 1) | 12                 | 12 M/ 0 F,<br>29 y                                           | NW<br>NR                               | 300 ml water with lemon juice added with sucralose (0 kJ, 0 kcal) or HFCS55 (1254 kJ, 300 kcal)                          | 80                                         | 1220 vs 1132                                      | -212                                                                    | 29%                                  |                                                                                                |
| Akhavan & Anderson <sup>(30)</sup><br>(Exp. 1) | 12                 | 12 M/ 0 F,<br>29 y                                           | NW<br>NR                               | 300 ml water with lemon juice added with sucralose (energy not reported) or sucrose (1254 kJ, 300 kcal)                  | 80                                         | 1220 vs 1052                                      | -132                                                                    | 56%                                  |                                                                                                |
| Akhavan & Anderson <sup>(30)</sup><br>(Exp. 1) | 12                 | 12 M/ 0 F,<br>29 y                                           | NW<br>NR                               | 300 ml water with lemon juice added with sucralose (0 kJ, 0 kcal) or glucose(80%)/ fructose(20%) mix (1254 kJ, 300 kcal) | 80                                         | 1220 vs 1045                                      | -126                                                                    | 58%                                  |                                                                                                |
| Appleton & Blundell <sup>(3)</sup>             | 10                 | 0 M/ 10 F,<br>X                                              | NW / OW<br>NR,<br><br>low LES consumer | 2 x 330 ml beverage with LES (41 kJ, 10 kcal) or sugars (1046 kJ, 250 kcal) before lunch                                 | 90 + 180                                   | 597 vs 584                                        | -227                                                                    | 5%                                   | test meal 180 min after 1 <sup>st</sup> drink and 90 min after 2 <sup>nd</sup> drink (morning) |

| <b>Adults</b>                      | <b>Sample size</b> | <b>Gender, age (y)</b><br><br><b>(mean, SD/SEM or range)</b> | <b>Weight status, restraint status</b> | <b>LES and comparison preloads</b>                                                              | <b>Preload to test meal interval (min)</b> | <b>Intake test meal (kcal), LES vs comparison</b> | <b>Δ intake preload + test meal (kcal), LES minus comparison (kcal)</b> | <b>COMPX (energy compensation %)</b> | <b>Notes</b>                                                                                     |
|------------------------------------|--------------------|--------------------------------------------------------------|----------------------------------------|-------------------------------------------------------------------------------------------------|--------------------------------------------|---------------------------------------------------|-------------------------------------------------------------------------|--------------------------------------|--------------------------------------------------------------------------------------------------|
| <b>Reference</b>                   |                    |                                                              |                                        |                                                                                                 |                                            |                                                   |                                                                         |                                      |                                                                                                  |
| Appleton & Blundell <sup>(3)</sup> | 10                 | 0 M/ 10 F, X                                                 | OW<br>NR, high LES consumers           | 2 x 330 ml beverage with LES (41 kJ, 10 kcal) or sugars (1046 kJ, 250 kcal) before lunch        | 90 + 180                                   | 906 vs 868                                        | -202                                                                    | 16%                                  | test meal 180 min after 1 <sup>st</sup> drink and 90 min after 2 <sup>nd</sup> drink (morning)   |
| Appleton & Blundell <sup>(3)</sup> | 10                 | 0 M/ 10 F, X                                                 | NW / OW<br>NR, low LES consumers       | 2 x 330 ml beverage with LES (41 kJ, 10 kcal) or sugars (1046 kJ, 250 kcal) before evening meal | 90 + 180                                   | 591 vs 540                                        | -189                                                                    | 21%                                  | test meal 180 min after 1 <sup>st</sup> drink and 90 min after 2 <sup>nd</sup> drink (afternoon) |
| Appleton & Blundell <sup>(3)</sup> | 10                 | 0 M/ 10 F, X                                                 | OW<br>NR, high LES consumers           | 2 x 330 ml beverage with LES (41 kJ, 10 kcal) or sugars (1046 kJ, 250 kcal) before evening meal | 90 + 180                                   | 642 vs 643                                        | -241                                                                    | 0%                                   | test meal 180 min after 1 <sup>st</sup> drink and 90 min after 2 <sup>nd</sup> drink (afternoon) |
| Monsivais et al. <sup>(126)</sup>  | 37                 | 19 M / 18 F<br>M: 23 (4.0) y<br>F: 23 (2.8) y                | NW<br>NR                               | 475 ml of cola with aspartame (8 kJ, 2 kcal) or HCFS42 (899 kJ, 215 kcal)                       | 120                                        | 1009 vs 979                                       | -182                                                                    | 14%                                  |                                                                                                  |

| <b>Adults</b>                                      | <b>Sample size</b> | <b>Gender, age (y)</b><br><br><b>(mean, SD/SEM or range)</b> | <b>Weight status, restraint status</b> | <b>LES and comparison preloads</b>                                                                                           | <b>Preload to test meal interval (min)</b> | <b>Intake test meal (kcal), LES vs comparison</b> | <b>Δ intake preload + test meal (kcal), LES minus comparison (kcal)</b> | <b>COMPX (energy compensation %)</b> | <b>Notes</b> |
|----------------------------------------------------|--------------------|--------------------------------------------------------------|----------------------------------------|------------------------------------------------------------------------------------------------------------------------------|--------------------------------------------|---------------------------------------------------|-------------------------------------------------------------------------|--------------------------------------|--------------|
| <b>Reference</b>                                   |                    |                                                              |                                        |                                                                                                                              |                                            |                                                   |                                                                         |                                      |              |
| Monsivais et al. <sup>(126)</sup>                  | 37                 | 19 M / 18 F<br>M: 23 (4.0) y<br>F: 23 (2.8) y                | NW<br>NR                               | 475 ml of cola with aspartame (8 kJ, 2 kcal) or HCFS55 (899 kJ, 215 kcal)                                                    | 120                                        | 1009 vs 969                                       | -171                                                                    | 19%                                  |              |
| Monsivais et al. <sup>(126)</sup>                  | 37                 | 19 M / 18 F<br>M: 23 (4.0) y<br>F: 23 (2.8) y                | NW<br>NR                               | 475 ml of cola with aspartame (8 kJ, 2 kcal) or sucrose (899 kJ, 215 kcal)                                                   | 120                                        | 1009 vs 957                                       | -161                                                                    | 24%                                  |              |
| Soenen and Westerterp – Plantenga <sup>(127)</sup> | 20                 | 0 M / 20 F,<br>21 y                                          | NW<br>NR                               | 800 ml of orange flavored beverage with aspartame / ace-K / sodium cyclamate (2 kJ, 0.5 kcal) or sucrose (1500 kJ, 359 kcal) | 50                                         | 548 vs 417                                        | -227                                                                    | 36%                                  |              |
| Soenen and Westerterp-Plantenga <sup>(127)</sup>   | 20                 | 0 M / 20 F,<br>21 y                                          | NW<br>NR                               | 800 ml of orange flavored beverage with aspartame / ace-K / sodium cyclamate (2 kJ, 0.5 kcal) or hfcs (1500 kJ, 359 kcal)    | 50                                         | 548 vs 448                                        | -259                                                                    | 28%                                  |              |

| <b>Adults</b>                                    | <b>Sample size</b> | <b>Gender, age (y)</b><br><br><b>(mean, SD/SEM or range)</b> | <b>Weight status, restraint status</b> | <b>LES and comparison preloads</b>                                                                                           | <b>Preload to test meal interval (min)</b> | <b>Intake test meal (kcal), LES vs comparison</b> | <b>Δ intake preload + test meal (kcal), LES minus comparison (kcal)</b> | <b>COMPX (energy compensation %)</b> | <b>Notes</b> |
|--------------------------------------------------|--------------------|--------------------------------------------------------------|----------------------------------------|------------------------------------------------------------------------------------------------------------------------------|--------------------------------------------|---------------------------------------------------|-------------------------------------------------------------------------|--------------------------------------|--------------|
| <b>Reference</b>                                 |                    |                                                              |                                        |                                                                                                                              |                                            |                                                   |                                                                         |                                      |              |
| Soenen and Westerterp-Plantenga <sup>(127)</sup> | 20                 | 20 M / 0 F, 22 y                                             | NW<br>NR                               | 800 ml of orange flavored beverage with aspartame / ace-K / sodium cyclamate (2 kJ, 0.5 kcal) or sucrose (1500 kJ, 359 kcal) | 50                                         | 753 vs 567                                        | -172                                                                    | 52%                                  |              |
| Soenen and Westerterp-Plantenga <sup>(127)</sup> | 20                 | 20 M / 0 F, 22 y                                             | NW<br>NR                               | 800 ml of orange flavored beverage with aspartame / ace-K / sodium cyclamate (2 kJ, 0.5 kcal) or hfcs (1500 kJ, 359 kcal)    | 50                                         | 753 vs 558                                        | -163                                                                    | 54%                                  |              |
| Anton et al. <sup>(128)</sup>                    | 31                 | M / F (not specified), 28 y                                  | 19 NW/<br>12 OB<br>NR                  | 400 g of crackers and cream cheese with stevia (1212 kJ, 290 kcal) or sucrose (2060 kJ, 493 kcal) before lunch               | 20                                         | 575 vs 554                                        | -182                                                                    | 10%                                  |              |
| Anton et al. <sup>(128)</sup>                    | 31                 | M / F (not specified), 28 y                                  | 19 NW/<br>12 OB<br>NR                  | 400 g of crackers and cream cheese with aspartame (1212 kJ, 290 kcal) or sucrose (2060 kJ, 493 kcal) before lunch            | 20                                         | 590 vs 554                                        | -167                                                                    | 18%                                  |              |

| <b>Adults</b>                     | <b>Sample size</b> | <b>Gender, age (y)</b><br><br><b>(mean, SD/SEM or range)</b> | <b>Weight status, restraint status</b> | <b>LES and comparison preloads</b>                                                                                 | <b>Preload to test meal interval (min)</b> | <b>Intake test meal (kcal), LES vs comparison</b> | <b>Δ intake preload + test meal (kcal), LES minus comparison (kcal)</b> | <b>COMPX (energy compensation %)</b> | <b>Notes</b> |
|-----------------------------------|--------------------|--------------------------------------------------------------|----------------------------------------|--------------------------------------------------------------------------------------------------------------------|--------------------------------------------|---------------------------------------------------|-------------------------------------------------------------------------|--------------------------------------|--------------|
| <b>Reference</b>                  |                    |                                                              |                                        |                                                                                                                    |                                            |                                                   |                                                                         |                                      |              |
| Anton et al. <sup>(128)</sup>     | 31                 | M / F (not specified), 28 y                                  | 19 NW/<br>12 OB<br>NR                  | 400 g of crackers and cream cheese with stevia (1212 kJ, 290 kcal) or sucrose (2060 kJ, 493 kcal) before dinner    | 20                                         | 624 vs, 548                                       | -127                                                                    | 37%                                  |              |
| Anton et al. <sup>(128)</sup>     | 31                 | M / F (not specified), 28 y                                  | 19 NW/<br>12 OB<br>NR                  | 400 g of crackers and cream cheese with aspartame (1212 kJ, 290 kcal) or sucrose (2060 kJ, 493 kcal) before dinner | 20                                         | 618 vs 548                                        | -133                                                                    | 34%                                  |              |
| Ranawana & Henry <sup>(129)</sup> | 23                 | 23 M / 0 F, 24 y                                             | NW<br>NR                               | 325 ml of fruit drink with aspartame + ace-K (0 kJ) or 349 ml of fruit drink with sucrose (627 kJ, 150 kcal)       | 60                                         | 1207 vs 1045                                      | 12                                                                      | 108%                                 |              |
| Ranawana & Henry <sup>(129)</sup> | 23                 | 23 M / 0 F, 24 y                                             | NW<br>NR                               | 325 ml of fruit drink with aspartame + ace-K (0 kJ) or 319 ml of orange juice (627 kJ, 150 kcal)                   | 60                                         | 1207 vs 1033                                      | 24                                                                      | 116%                                 |              |



| <b>Adults</b>                            | <b>Sample size</b> | <b>Gender, age (y)</b><br><br><b>(mean, SD/SEM or range)</b> | <b>Weight status, restraint status</b> | <b>LES and comparison preloads</b>                                                                                                                     | <b>Preload to test meal interval (min)</b> | <b>Intake test meal (kcal), LES vs comparison</b> | <b>Δ intake preload + test meal (kcal), LES minus comparison (kcal)</b> | <b>COMPX (energy compensation %)</b> | <b>Notes</b> |
|------------------------------------------|--------------------|--------------------------------------------------------------|----------------------------------------|--------------------------------------------------------------------------------------------------------------------------------------------------------|--------------------------------------------|---------------------------------------------------|-------------------------------------------------------------------------|--------------------------------------|--------------|
| <b>Reference</b>                         |                    |                                                              |                                        |                                                                                                                                                        |                                            |                                                   |                                                                         |                                      |              |
| Ranawana & Henry <sup>(129)</sup>        | 24                 | 0 M / 24 F, 24 y                                             | NW<br>NR                               | 325 ml of fruit drink with aspartame + ace-K (0 kJ) or 349 ml of fruit drink with sucrose (627 kJ, 150 kcal)                                           | 60                                         | 786 vs 776                                        | -140                                                                    | 7%                                   |              |
| Ranawana & Henry <sup>(129)</sup>        | 24                 | 0 M / 24 F, 24 y                                             | NW<br>NR                               | 325 ml of fruit drink with aspartame + ace-K (0 kJ) or 319 ml of orange juice (627 kJ, 150 kcal)                                                       | 60                                         | 786 vs 701                                        | -65                                                                     | 57%                                  |              |
| Akhavan et al. <sup>(130)</sup> (Exp. 2) |                    | 15 M/ 0 F, 19-28 y                                           | NW<br>NR                               | 300 ml lemon-flavored water with 0.13 g sucralose and 6 g gelatin not set (84 kJ, 20 kcal) or 75 g sucrose and 6 g gelatin set (1339 kJ, 320 kcal)     | 60                                         | 15                                                | -204                                                                    | 32%                                  |              |
| Akhavan et al. <sup>(130)</sup> (Exp. 2) | 15                 | 15 M/ 0 F, 19-28 y                                           | NW<br>NR                               | 300 ml lemon-flavored water with 0.13 g sucralose and 6 g gelatin not set (84 kJ, 20 kcal) or 75 g sucrose and 6 g gelatin not set (1339 kJ, 320 kcal) | 60                                         | 1465 vs 1360                                      | -195                                                                    | 35%                                  |              |

| <b>Adults</b>                               | <b>Sample size</b> | <b>Gender, age (y)</b><br><br><b>(mean, SD/SEM or range)</b> | <b>Weight status, restraint status</b> | <b>LES and comparison preloads</b>                                                                                                                                                                         | <b>Preload to test meal interval (min)</b> | <b>Intake test meal (kcal), LES vs comparison</b> | <b>Δ intake preload + test meal (kcal), LES minus comparison (kcal)</b> | <b>COMPX (energy compensation %)</b> | <b>Notes</b> |
|---------------------------------------------|--------------------|--------------------------------------------------------------|----------------------------------------|------------------------------------------------------------------------------------------------------------------------------------------------------------------------------------------------------------|--------------------------------------------|---------------------------------------------------|-------------------------------------------------------------------------|--------------------------------------|--------------|
| <b>Reference</b>                            |                    |                                                              |                                        |                                                                                                                                                                                                            |                                            |                                                   |                                                                         |                                      |              |
| Akhavan et al. <sup>(130)</sup><br>(Exp. 2) | 15                 | 15 M/ 0 F,<br>19-28 y                                        | NW<br>NR                               | 300 ml lemon-flavored water with 0.13 g sucralose and 6g gelatin not set (84 kJ, 20 kcal) or 75 g sucrose and 6 g gelatin not set (1272 kJ, 304 kcal) or glucose (50%)/ fructose (50%) (1339 kJ, 320 kcal) | 60                                         | 1465 vs<br>1358                                   | -193                                                                    | 36%                                  |              |
| Rogers et al. <sup>(131)</sup>              | 15                 | 15 M / 0 F,<br>25 y                                          | NW,<br>NR                              | 300 ml of blackcurrant juice with sucralose (8 kJ, 2 kcal) or sucrose (669 kJ, 160 kcal)                                                                                                                   | 20                                         | 1294 vs<br>1198                                   | -62                                                                     | 61%                                  |              |
| Rogers et al. <sup>(131)</sup>              | 18                 | 0 M / 18 F,<br>25 y                                          | NW,<br>NR                              | 300 ml of blackcurrant juice with sucralose (8 kJ, 2 kcal) or sucrose (669 kJ, 160 kcal)                                                                                                                   | 20                                         | 827 vs 760                                        | -91                                                                     | 42%                                  |              |
| Maersk et al. <sup>(132)</sup>              | 14                 | 7 M / 7 F,<br>34 (9.2) y                                     | OW / OB<br>X                           | 500 ml of diet cola with aspartame (7.5 kJ, 2 kcal) or regular cola with sucrose (900 kJ, 215 kcal)                                                                                                        | 240                                        | 1196 vs<br>1155                                   | -172                                                                    | 20%                                  |              |

| <b>Adults</b>                    | <b>Sample size</b> | <b>Gender, age (y)</b><br><br><b>(mean, SD/SEM or range)</b> | <b>Weight status, restraint status</b> | <b>LES and comparison preloads</b>                                                   | <b>Preload to test meal interval (min)</b> | <b>Intake test meal (kcal), LES vs comparison</b> | <b>Δ intake preload + test meal (kcal), LES minus comparison (kcal)</b> | <b>COMPX (energy compensation %)</b> | <b>Notes</b>                                                                                      |
|----------------------------------|--------------------|--------------------------------------------------------------|----------------------------------------|--------------------------------------------------------------------------------------|--------------------------------------------|---------------------------------------------------|-------------------------------------------------------------------------|--------------------------------------|---------------------------------------------------------------------------------------------------|
| <b>Reference</b>                 |                    |                                                              |                                        |                                                                                      |                                            |                                                   |                                                                         |                                      |                                                                                                   |
| Carvalho et al. <sup>(133)</sup> | 24                 | 13 M / 11 F, 21.5 (2.33) y                                   | NW<br>Non-dieting                      | 500 ml of pineapple soda with sucralose (92 kJ, 22 kcal) or sugar (920 kJ, 220 kcal) | 150                                        | 1385 vs 1488                                      | -301                                                                    | -52%                                 |                                                                                                   |
| Panahi et al. <sup>(134)</sup>   | 29                 | 15 M / 14 F, 22 y                                            | NW<br>NR                               | 373 g of diet cola (0 kJ, 0 kcal) or 443 g of regular cola (815 kJ, 195 kcal)        | 0                                          | 926 vs 915                                        | -184                                                                    | 6%                                   | Beverages consumed <i>ad libitum</i> with meal; <i>ad libitum</i> intake diet vs. regular cola NS |

EI, energy intake; LES, low energy sweetener; Δ, change (difference from baseline to last time point unless otherwise described); COMPX, compensation index.

**Table S8. Characteristics and results of short-term intervention studies comparing the effects on EI of LES versus unsweetened products**

| <i>Children</i>                | Sample size | Gender, age (y)<br><br>(mean, SD/SEM<br>or range) | Weight status, restraint status | LES and comparison preloads                                                                 | Preload to test meal interval (min) | Intake test meal (kcal), LES vs comparison | Δ cumulative intake (kcal), LES minus comparison (kcal) | Notes |
|--------------------------------|-------------|---------------------------------------------------|---------------------------------|---------------------------------------------------------------------------------------------|-------------------------------------|--------------------------------------------|---------------------------------------------------------|-------|
| Wilson et al. <sup>(102)</sup> | 135         | 63 M / 72 F, 1.5-5.5 y                            | NW<br>X                         | 1.1 L chocolate milk with aspartame (345 kJ, 83 kcal) or 0.8 L plain milk (222 kJ, 53 kcal) | 0                                   | 242 vs 262                                 | 10                                                      |       |
| Wilson et al. <sup>(102)</sup> | 135         | 63 M / 72 F, 1.5-5.5 y                            | NW<br>X                         | 1.5 L chocolate milk with aspartame (389 kJ, 93 kcal) or 0.8 L plain milk (205 kJ, 49 kcal) | 0                                   | 206 vs 250                                 | 0                                                       |       |
| Wilson et al. <sup>(102)</sup> | 135         | 63 M / 72 F, 1.5-5.5 y                            | NW<br>X                         | 1.1 L chocolate milk with aspartame (345 kJ, 83 kcal) or 0.8 L plain milk (205 kJ, 49 kcal) | 0                                   | 209 vs 219                                 | 24                                                      |       |
| Wilson et al. <sup>(102)</sup> | 135         | 63 M / 72 F, 1.5-5.5 y                            | NW<br>X                         | 1.5 L chocolate milk with aspartame (389 kJ, 93 kcal) or 0.8 L plain milk (275 kJ, 66 kcal) | 0                                   | 248 vs 275                                 | 0                                                       |       |

| <b>Adults</b>                      | <b>Sample size</b> | <b>Gender, age (y)</b><br><br><b>(mean, SD/SEM or range)</b>  | <b>Weight status, restraint status</b> | <b>LES and comparison preloads</b>                                                                                | <b>Preload to test meal interval (min)</b> | <b>Intake test meal (kcal), LES vs comparison</b> | <b>Δ intake preload + test meal (kcal),<br/><br/>LES minus comparison (kcal)</b> | <b>Notes</b>                                                                           |
|------------------------------------|--------------------|---------------------------------------------------------------|----------------------------------------|-------------------------------------------------------------------------------------------------------------------|--------------------------------------------|---------------------------------------------------|----------------------------------------------------------------------------------|----------------------------------------------------------------------------------------|
| <b>Reference</b>                   |                    |                                                               |                                        |                                                                                                                   |                                            |                                                   |                                                                                  |                                                                                        |
| Brala & Hagen <sup>(108)</sup>     | 39                 | M/ F (not specified, about half-half), undergraduate students | NW<br>X                                | 240 ml chocolate milk with 0.6 g aspartame (828 kJ, 198 kcal) (n = 18) or nothing added (828 kJ, 198 kcal) (n=21) | 75                                         | 634 vs 480                                        | 163                                                                              | Rinse with sweetness blocker (gymnemic acid)<br><br>n=18 aspartame, n=21 nothing added |
| Brala & Hagen <sup>(108)</sup>     | 34                 | M/ F (not specified, about half-half), undergraduate students | NW<br>X                                | 240 ml chocolate milk with 0.6 g aspartame (828 kJ, 198 kcal) (n=17) or nothing added (828 kJ, 198 kcal) (n=17)   | 75                                         | 623 vs 678 kcal                                   | -55                                                                              | Rinse with tea<br><br>n=17 aspartame, n=17 nothing added                               |
| Rogers & Blundell <sup>(110)</sup> | 21                 | 4 M / 17 F, 18-29 y                                           | NW<br>NR                               | Yogurt with saccharin (548 kJ, 131 kcal) or unsweetened yougurt (548 kJ, 131 kcal)                                | 60                                         | 949 vs 947                                        | 102                                                                              |                                                                                        |
| Ho et al. <sup>(135)</sup>         | 8                  | 0 M / 8 F<br>40 y                                             | NW<br>R                                | 167 ml lemon flavored pudding with cyclamate (280 kJ, 67 kcal) or unsweetened (280 kJ, 67 kcal)                   | 30                                         | 456 vs 545                                        | -89                                                                              |                                                                                        |

| <b>Adults</b>              | <b>Sample size</b> | <b>Gender, age (y)</b><br><br><b>(mean, SD/SEM or range)</b> | <b>Weight status, restraint status</b> | <b>LES and comparison preloads</b>                                                                  | <b>Preload to test meal interval (min)</b> | <b>Intake test meal (kcal), LES vs comparison</b> | <b>Δ intake preload + test meal (kcal),<br/><br/>LES minus comparison (kcal)</b> | <b>Notes</b> |
|----------------------------|--------------------|--------------------------------------------------------------|----------------------------------------|-----------------------------------------------------------------------------------------------------|--------------------------------------------|---------------------------------------------------|----------------------------------------------------------------------------------|--------------|
| <b>Reference</b>           |                    |                                                              |                                        |                                                                                                     |                                            |                                                   |                                                                                  |              |
| Ho et al. <sup>(135)</sup> | 9                  | 0 M / 9 F<br>49 y                                            | OW<br>R                                | 167 ml lemon flavored pudding with cyclamate (280 kJ, 67 kcal) or unsweetened (280 kJ, 67 kcal)     | 30                                         | 480 vs 498                                        | -18                                                                              |              |
| Ho et al. <sup>(135)</sup> | 7                  | 0 M / 7 F<br>41 y                                            | NW<br>NR                               | 167 ml lemon flavored pudding with cyclamate (280 kJ, 67 kcal) or unsweetened (280 kJ, 67 kcal)     | 30                                         | 657 vs 567                                        | 90                                                                               |              |
| Ho et al. <sup>(135)</sup> | 8                  | 0 M / 8 F<br>40 y                                            | NW<br>R                                | 167 ml lemon flavored pudding with cyclamate (1644 kJ, 393 kcal) or unsweetened (1644 kJ, 393 kcal) | 30                                         | 406 vs 461                                        | -55                                                                              |              |
| Ho et al. <sup>(135)</sup> | 9                  | 0 M / 9 F<br>49 y                                            | OW<br>R                                | 167 ml lemon flavored pudding with cyclamate (1644 kJ, 393 kcal) or unsweetened (1644 kJ, 393 kcal) | 30                                         | 403 vs 415                                        | -12                                                                              |              |
| Ho et al. <sup>(135)</sup> | 7                  | 0 M / 7 F<br>41 y                                            | NW<br>NR                               | 167 ml lemon flavored pudding with cyclamate (1644 kJ, 393 kcal) or unsweetened (1644 kJ, 393 kcal) | 30                                         | 534 vs 552                                        | -18                                                                              |              |

| <b>Adults</b>                      | <b>Sample size</b> | <b>Gender, age (y)</b><br><br><b>(mean, SD/SEM or range)</b> | <b>Weight status, restraint status</b> | <b>LES and comparison preloads</b>                                                              | <b>Preload to test meal interval (min)</b> | <b>Intake test meal (kcal), LES vs comparison</b> | <b>Δ intake preload + test meal (kcal),<br/><br/>LES minus comparison (kcal)</b> | <b>Notes</b>                                          |
|------------------------------------|--------------------|--------------------------------------------------------------|----------------------------------------|-------------------------------------------------------------------------------------------------|--------------------------------------------|---------------------------------------------------|----------------------------------------------------------------------------------|-------------------------------------------------------|
| <b>Reference</b>                   |                    |                                                              |                                        |                                                                                                 |                                            |                                                   |                                                                                  |                                                       |
| Rogers et al. <sup>(112)</sup>     | 18                 | M / F (not specified), 18-25                                 | NW non-dieting                         | Yogurt with 200 mg aspartame (548 kJ, 131 kcal) or unsweetened yogurt (548 kJ, 131 kcal)        | 60                                         | 878 vs 814                                        | 64                                                                               | Subjects not informed about sweetener or kcal content |
| Rogers et al. <sup>(112)</sup>     | 23                 | M / F (not specified), 18-25                                 | NW non-dieting                         | Yogurt with 200 mg aspartame (548 kJ, 131 kcal) or unsweetened yogurt (548 kJ, 131 kcal)        | 60                                         | 1130 vs 1017                                      | 113                                                                              | Subjects informed about sweetener or kcal content     |
| Drewnowski et al. <sup>(115)</sup> | 12                 | 0 M / 12 F 34 y                                              | OB NR                                  | 400 g cream cheese with aspartame (1255 kJ, 300 kcal) or plain cream cheese (1255 kJ, 300 kcal) | 180 min                                    | 1255 vs 1224                                      | 31                                                                               |                                                       |
| Drewnowski et al. <sup>(116)</sup> | 12                 | 0 M / 12 F 25 y                                              | NW NR                                  | 400 g cream cheese with aspartame (1255 kJ, 300 kcal) or plain cream cheese (1255 kJ, 300 kcal) | 180 min                                    | 584 vs 657                                        | -73                                                                              |                                                       |
| Drewnowski et al. <sup>(116)</sup> | 12                 | 12 M / 0 F 26 y                                              | NW NR                                  | 400 g cream cheese with aspartame (xx kJ, xx kcal) or plain cream cheese (xx kJ, xx kcal)       | 180                                        | 900 vs 868                                        | 34                                                                               |                                                       |

| <b>Adults</b>                               | <b>Sample size</b> | <b>Gender, age (y)</b><br><br><b>(mean, SD/SEM or range)</b> | <b>Weight status, restraint status</b> | <b>LES and comparison preloads</b>                                                                                                             | <b>Preload to test meal interval (min)</b>        | <b>Intake test meal (kcal), LES vs comparison</b> | <b>Δ intake preload + test meal (kcal),<br/><br/>LES minus comparison (kcal)</b> | <b>Notes</b>                                                           |
|---------------------------------------------|--------------------|--------------------------------------------------------------|----------------------------------------|------------------------------------------------------------------------------------------------------------------------------------------------|---------------------------------------------------|---------------------------------------------------|----------------------------------------------------------------------------------|------------------------------------------------------------------------|
| Beridot – Therond et al. <sup>(4)</sup>     | 24                 | 12 M / 12 F<br>20-25 y                                       | NW<br>NR                               | 876 ml orange beverage with aspartame (0 kJ, 0 kcal) or 572 ml unsweetened orange flavored beverage                                            | Ad libitum, 0 to 15                               | 803 vs 819                                        | -16                                                                              | Ad libitum intake;<br><br>intake from lunch up until and during dinner |
| Beridot – Therond et al. <sup>(4)</sup>     | 24                 | 12 M / 12 F<br>20-25 y                                       | NW<br>NR                               | 541 ml orange flavored beverage with aspartame (0 kJ, 0 kcal) or 572 ml unsweetened orange flavored beverage                                   | Ad libitum beverage intake from 6 h before dinner | 595 vs 632                                        | -37                                                                              | Ad libitum intake;<br><br>intake from lunch up until and during dinner |
| Akhavan et al. <sup>(130)</sup><br>(Exp. 1) | 14                 | 14 M / 0 F, 19-28 y                                          | NW,<br>NR                              | 300 ml of orange-flavored water with 6 g gelatin not set and 0.13 g sucralose (0 kJ, 0 kcal) or orange-flavored water with 6 g gelatin not set | 60                                                | 1273 vs 1373                                      | -100                                                                             |                                                                        |

EI, energy intake; LES, low energy sweetener; Δ, change (difference from baseline to last time point unless otherwise described).



**Table S9. Characteristics and results of short-term intervention studies comparing the effects on EI of LES versus water**

| <i>Children</i>                          | <b>Sample size</b> | <b>Gender, age (y)</b><br><br><b>(mean, SD/SEM or range)</b> | <b>Weight status, restraint status</b> | <b>LES and comparison preloads</b>                            | <b>Preload to test meal interval (min)</b> | <b>Intake test meal (kcal), LES vs comparison</b> | <b>Δ cumulative intake (kcal), LES minus comparison (kcal)</b> | <b>Notes</b> |
|------------------------------------------|--------------------|--------------------------------------------------------------|----------------------------------------|---------------------------------------------------------------|--------------------------------------------|---------------------------------------------------|----------------------------------------------------------------|--------------|
| <b>Reference</b>                         |                    |                                                              |                                        |                                                               |                                            |                                                   |                                                                |              |
| Birch et al. <sup>(96)</sup><br>(Exp. 1) | 24                 | 10 M / 14 F,<br>5 y                                          | NW/OW,<br>non-dieting                  | 205 mL water with 140 mg aspartame (15 kJ, 3.5 kcal) or water | 0                                          | 451 vs 454                                        | 0.5                                                            |              |
| Birch et al. <sup>(96)</sup><br>(Exp. 1) | 24                 | 10 M / 14 F,<br>5 y                                          | NW/OW,<br>non-dieting                  | 205 mL water with 140 mg aspartame (15 kJ, 3.5 kcal) or water | 30                                         | 458 vs 521                                        | -59.5                                                          |              |
| Birch et al. <sup>(96)</sup><br>(Exp. 1) | 24                 | 10 M / 14 F,<br>5 y                                          | NW/OW,<br>non-dieting                  | 205 mL water with 140 mg aspartame (15 kJ, 3.5 kcal) or water | 60                                         | 378 vs 421                                        | -39.5                                                          |              |
| Birch et al. <sup>(96)</sup><br>(Exp. 2) | 20                 | 7 M / 13 F,<br>3 y                                           | NW/OW,<br>non-dieting                  | 205 mL water with 140 mg aspartame (15 kJ, 3.5 kcal) or water | 0                                          | 350 vs 371                                        | -18.4                                                          |              |
| Birch et al. <sup>(96)</sup><br>(Exp. 2) | 20                 | 7 M / 13 F,<br>3 y                                           | NW/OW,<br>non-dieting                  | 205 mL water with 140 mg aspartame (15 kJ, 3.5 kcal) or water | 30                                         | 353 vs 391                                        | -35.4                                                          |              |
| Birch et al. <sup>(96)</sup><br>(Exp. 2) | 20                 | 7 M / 13 F,<br>3 y                                           | NW/OW,<br>non-dieting                  | 205 mL water with 140 mg aspartame (15 kJ, 3.5 kcal) or water | 60                                         | 346 vs 367                                        | -18.4                                                          |              |

| <b>Adults</b>                  | <b>Sample size</b> | <b>Gender, age (y)</b><br><br><b>(mean, SD/SEM or range)</b> | <b>Weight status, restraint status</b> | <b>LES and comparison preloads</b>                      | <b>Preload to test meal interval (min)</b> | <b>Intake test meal (kcal), LES vs comparison</b> | <b>Δ intake preload + test meal (kcal),<br/><br/>LES minus comparison (kcal)</b> | <b>Notes</b> |
|--------------------------------|--------------------|--------------------------------------------------------------|----------------------------------------|---------------------------------------------------------|--------------------------------------------|---------------------------------------------------|----------------------------------------------------------------------------------|--------------|
| <b>Reference</b>               |                    |                                                              |                                        |                                                         |                                            |                                                   |                                                                                  |              |
| Rogers et al. <sup>(108)</sup> | 12                 | 4 M / 8 F<br>19 y                                            | NW<br>NR                               | 200 ml of water with acesulfame K (0 kcal) or water     | 60                                         | 1395 vs 1436                                      | -41                                                                              |              |
| Rogers et al. <sup>(108)</sup> | 12                 | 4 M / 8 F<br>19 y                                            | NW<br>NR                               | 200 ml of water with saccharine (0 kcal) or water       | 60                                         | 1388 vs 1436                                      | -48                                                                              |              |
| Rogers et al. <sup>(108)</sup> | 12                 | 4 M / 8 F<br>19 y                                            | NW<br>NR                               | 200 ml of water with aspartame (13 kJ, 3 kcal) or water | 60                                         | 1333 vs 1436                                      | -100                                                                             |              |
| Rodin et al. <sup>(111)</sup>  | 6                  | 6 M / 0 F<br>22-50 y                                         | OW<br>X                                | 500 ml of xx with aspartame (15 kJ, 3.7 kcal) or water  | 50                                         | 1597 vs 1487                                      | 114                                                                              |              |
| Rodin et al. <sup>(111)</sup>  | 4                  | 4 M / 0 F<br>22-50 y                                         | NW<br>X                                | 500 ml of xx with aspartame (15 kJ, 3.7 kcal) or water  | 50                                         | 1217 vs 1333                                      | -112                                                                             |              |
| Rodin et al. <sup>(111)</sup>  | 6                  | 0 M / 6 F<br>22-50 y                                         | OW<br>X                                | 500 ml of xx with aspartame (15 kJ, 3.7 kcal) or water  | 50                                         | 1204 vs 1285                                      | -77                                                                              |              |
| Rodin et al. <sup>(111)</sup>  | 4                  | 0 M / 4 F<br>22-50 y                                         | NW<br>X                                | 500 ml of xx with aspartame (15 kJ, 3.7 kcal) or water  | 50                                         | 978 vs 809                                        | 173                                                                              |              |

| <b>Adults</b>                              | <b>Sample size</b> | <b>Gender, age (y)</b><br><br><b>(mean, SD/SEM or range)</b> | <b>Weight status, restraint status</b> | <b>LES and comparison preloads</b>                                                                                                                                  | <b>Preload to test meal interval (min)</b> | <b>Intake test meal (kcal), LES vs comparison</b> | <b>Δ intake preload + test meal (kcal),<br/><br/>LES minus comparison (kcal)</b> | <b>Notes</b> |
|--------------------------------------------|--------------------|--------------------------------------------------------------|----------------------------------------|---------------------------------------------------------------------------------------------------------------------------------------------------------------------|--------------------------------------------|---------------------------------------------------|----------------------------------------------------------------------------------|--------------|
| <b>Reference</b>                           |                    |                                                              |                                        |                                                                                                                                                                     |                                            |                                                   |                                                                                  |              |
| Rogers et al. <sup>(136)</sup><br>(Exp. 1) | 12                 | 6 M / 6 F<br>18-26 y                                         | NW<br>NR                               | 200 ml of water with 235 mg aspartame (21 kJ, 5 kcal) plus placebo capsule with 1.2 g corn flour (21 kJ, 5 kcal) or water with same placebo capsule (21 kJ, 5 kcal) | 60                                         | 1214 vs 1263                                      | -49                                                                              |              |
| Rogers et al. <sup>(136)</sup><br>(Exp 2)  | 15                 | 5 M / 10 F<br>19-24 y                                        | NW<br>NR                               | 200 ml of water with aspartame (4 kJ, 1 kcal) plus placebo capsule with 235 mg corn flour (4 kJ, 1 kcal) or water with placebo capsule (4 kJ, 1 kcal)               | 60                                         | 1339 vs 1467                                      | -128                                                                             |              |
| Rolls et al. <sup>(114)</sup>              | 13                 | 13 M / 0 F<br>25 (4.3) y                                     | NW<br>NR                               | 237 ml drink with 0.11 g aspartame (21 kJ, 5 kcal) or water                                                                                                         | 0                                          | 1022 vs 1083                                      | -56                                                                              |              |
| Rolls et al. <sup>(113)</sup>              | 13                 | 13 M / 0 F<br>25 (4.3) y                                     | NW<br>NR                               | 473 ml drink 0.22 gaspartame (42 kJ, 10 kcal) or water                                                                                                              | 0                                          | 1113 vs 1077                                      | 41                                                                               |              |
| Rolls et al. <sup>(113)</sup>              | 13                 | 13 M / 0 F<br>25 (4.3) y                                     | NW<br>NR                               | 237 ml drink with 0.11 g aspartame (21 kJ, 5 kcal) or water                                                                                                         | 30                                         | 1093 vs 1137                                      | -39                                                                              |              |

| <b>Adults</b>                 | <b>Sample size</b> | <b>Gender, age (y)</b><br><br><b>(mean, SD/SEM or range)</b> | <b>Weight status, restraint status</b> | <b>LES and comparison preloads</b>                          | <b>Preload to test meal interval (min)</b> | <b>Intake test meal (kcal), LES vs comparison</b> | <b>Δ intake preload + test meal (kcal),<br/><br/>LES minus comparison (kcal)</b> | <b>Notes</b>       |
|-------------------------------|--------------------|--------------------------------------------------------------|----------------------------------------|-------------------------------------------------------------|--------------------------------------------|---------------------------------------------------|----------------------------------------------------------------------------------|--------------------|
| <b>Reference</b>              |                    |                                                              |                                        |                                                             |                                            |                                                   |                                                                                  |                    |
| Rolls et al. <sup>(113)</sup> | 13                 | 13 M / 0 F<br>25 (4.3) y                                     | NW<br>NR                               | 473 ml drink 0.22 gaspartame (42 kJ, 10 kcal) or water      | 30                                         | 1138 vs 1199                                      | -56                                                                              |                    |
| Rolls et al. <sup>(113)</sup> | 13                 | 13 M / 0 F<br>25 (4.3) y                                     | NW<br>NR                               | 237 ml drink with 0.11 g aspartame (21 kJ, 5 kcal) or water | 60                                         | 1211 vs 1147                                      | 69                                                                               |                    |
| Rolls et al. <sup>(113)</sup> | 13                 | 13 M / 0 F<br>25 (4.3) y                                     | NW<br>NR                               | 473 ml drink 0.22 gaspartame (42 kJ, 10 kcal) or water      | 60                                         | 1140 vs 1125                                      | -80                                                                              |                    |
| Black et al. <sup>(137)</sup> | 7                  | 7 M / 0 F<br>19-25 y                                         | NW / OW<br>R                           | 280 ml soda with aspartame (0 kcal) or water                | 60                                         | 1770 vs 1970                                      | -200                                                                             | Consumed in 2 min  |
| Black et al. <sup>(137)</sup> | 13                 | 13 M / 0 F<br>19-25 y                                        | NW / OW<br>NR                          | 280 ml soda with aspartame (0 kcal) or water                | 60                                         | 1370 vs 1290                                      | 80                                                                               | Consumed in 2 min  |
| Black et al. <sup>(137)</sup> | 7                  | 7 M / 0 F<br>19-25 y                                         | NW / OW<br>R                           | 280 ml soda with aspartame (0 kcal) or water                | 60                                         | 1880 vs 1970                                      | -90                                                                              | Consumed in 10 min |
| Black et al. <sup>(137)</sup> | 13                 | 13 M / 0 F<br>19-25 y                                        | NW / OW<br>NR                          | 280 ml soda with aspartame (0 kcal) or water                | 60                                         | 1432 vs 1290                                      | 142                                                                              | Consumed in 10 min |

| <b>Adults</b>                        | <b>Sample size</b> | <b>Gender, age (y)</b><br><br><b>(mean, SD/SEM or range)</b> | <b>Weight status, restraint status</b> | <b>LES and comparison preloads</b>                                          | <b>Preload to test meal interval (min)</b>   | <b>Intake test meal (kcal), LES vs comparison</b> | <b>Δ intake preload + test meal (kcal),<br/><br/>LES minus comparison (kcal)</b> | <b>Notes</b>            |
|--------------------------------------|--------------------|--------------------------------------------------------------|----------------------------------------|-----------------------------------------------------------------------------|----------------------------------------------|---------------------------------------------------|----------------------------------------------------------------------------------|-------------------------|
| <b>Reference</b>                     |                    |                                                              |                                        |                                                                             |                                              |                                                   |                                                                                  |                         |
| Black et al. <sup>(137)</sup>        | 7                  | 7 M / 0 F<br>19-25 y                                         | NW / OW<br>R                           | 560 ml soda with aspartame (0 kcal) or water                                | 60                                           | 1740 vs 1970                                      | -230                                                                             | Consumed in 10 min      |
| Black et al. <sup>(137)</sup>        | 13                 | 13 M / 0 F<br>19-25 y                                        | NW / OW<br>NR                          | 560 ml soda with aspartame (0 kcal) or water                                | 60                                           | 1456 vs 1290                                      | 166                                                                              | Consumed in 10 min      |
| Canty & Chan <sup>(115)</sup>        | 20                 | 20 M / 0 F<br>29 (1 (23-37))                                 | NW<br>NR                               | 200 ml cherry flavored drink with aspartame (energy not reported) or water  | 60                                           | 606 vs 589                                        | 17                                                                               |                         |
| Canty & Chan <sup>(114)</sup>        | 20                 | 20 M / 0 F<br>29 (1) (23-37) y                               | NW<br>NR                               | 200 ml cherry flavored drink with saccharine (energy not reported) or water | 60                                           | 568 vs 589                                        | -21                                                                              |                         |
| Black et al. <sup>(138)</sup>        | 18                 | 18 M / 0 F<br>19-25 y                                        | NW<br>X                                | 280 ml diet soda (0 kJ, 0 kcal) or water                                    | 60                                           | 1721 vs 1721                                      | 0                                                                                |                         |
| Black et al. <sup>(138)</sup>        | 18                 | 18 M / 0 F<br>19-25 y                                        | NW<br>X                                | 560 ml diet soda (0 kJ, 0kcal) or water                                     | 60                                           | 1827 vs 1711                                      | 116                                                                              |                         |
| Reid and Hammersley <sup>(118)</sup> | 18                 | 18 M / 0 F<br>18-55 y                                        | NW<br>X                                | 568 ml of orange squash with saccharin (42 kJ, 10 kcal) or water            | ≥60, varied, next meal was not fixed in time | 560 vs 698                                        | -128                                                                             | Between subjects design |

| <b>Adults</b>                           | <b>Sample size</b> | <b>Gender, age (y)</b><br><br><b>(mean, SD/SEM or range)</b> | <b>Weight status, restraint status</b> | <b>LES and comparison preloads</b>                                           | <b>Preload to test meal interval (min)</b>   | <b>Intake test meal (kcal), LES vs comparison</b> | <b>Δ intake preload + test meal (kcal),<br/><br/>LES minus comparison (kcal)</b> | <b>Notes</b>                                                            |
|-----------------------------------------|--------------------|--------------------------------------------------------------|----------------------------------------|------------------------------------------------------------------------------|----------------------------------------------|---------------------------------------------------|----------------------------------------------------------------------------------|-------------------------------------------------------------------------|
| <b>Reference</b>                        |                    |                                                              |                                        |                                                                              |                                              |                                                   |                                                                                  |                                                                         |
| Reid and Hammersley <sup>(118)</sup>    | 20                 | 0 M / 20 F<br>18-55 y                                        | NW<br>X                                | 568 ml of orange squash with saccharin (42 kJ, 10 kcal) or water             | ≥60, varied, next meal was not fixed in time | 397 vs 548                                        | -141                                                                             | Between subjects design                                                 |
| Kim & Kissilef <sup>(119)</sup>         | 8                  | 3 M / 5 F<br>22 (2) y                                        | NW<br>NR                               | 500 ml of 1%-glucose solution with 260 mg aspartame (84 kJ, 20kcal) or water | 30                                           | 613 vs 641                                        | -8                                                                               | Lab-setting                                                             |
| Kim & Kissilef <sup>(119)</sup>         | 8                  | 3 M / 5 F<br>22 (2) y                                        | NW<br>NR                               | 500 ml of 1%-glucose solution with 260 mg aspartame (84 kJ, 20kcal) or water | 30                                           | 668 vs 641                                        | 47                                                                               | Cafeteria-setting                                                       |
| Lavin et al. <sup>(5)</sup>             | 14                 | 0 M / 14 F<br>X                                              | NW<br>R                                | 4 * 330 ml lemonade with aspartame (42 kJ or 10 kcal/1320 ml) or water       | 24h intake                                   | 3181 vs 2967                                      | 224                                                                              | 4*330 ml lemonade consumed during day                                   |
| Beridot – Therond et al. <sup>(4)</sup> | 24                 | 12 M / 12 F<br>20-25 y                                       | NW<br>NR                               | 876 ml orange beverage with aspartame (0 kJ, 0 kcal) or 646 ml water         | <i>Ad libitum</i> , 0 to 15                  | 803 vs 857                                        | -54                                                                              | <i>Ad libitum</i> intake<br><br>intake continued up to and during lunch |

| <b>Adults</b>                           | <b>Sample size</b> | <b>Gender, age (y)</b><br><br><b>(mean, SD/SEM or range)</b> | <b>Weight status, restraint status</b> | <b>LES and comparison preloads</b>                                             | <b>Preload to test meal interval (min)</b>                | <b>Intake test meal (kcal), LES vs comparison</b> | <b>Δ intake preload + test meal (kcal),<br/><br/>LES minus comparison (kcal)</b> | <b>Notes</b>                                                                 |
|-----------------------------------------|--------------------|--------------------------------------------------------------|----------------------------------------|--------------------------------------------------------------------------------|-----------------------------------------------------------|---------------------------------------------------|----------------------------------------------------------------------------------|------------------------------------------------------------------------------|
| <b>Reference</b>                        |                    |                                                              |                                        |                                                                                |                                                           |                                                   |                                                                                  |                                                                              |
| Beridot – Therond et al. <sup>(4)</sup> | 24                 | 12 M / 12 F<br>20-25 y                                       | NW<br>NR                               | 876 ml orange flavored beverage with aspartame (0 kJ, 0 kcal) or 1480 ml water | <i>Ad libitum</i> , 0 to 15                               | 803 vs 969                                        | -166                                                                             | <i>Ad libitum</i> intake<br><br>intake continued up to and during lunch      |
| Beridot-Therond et al. <sup>(4)</sup>   | 24                 | 12 M / 12 F<br>20-25 y                                       | NW<br>NR                               | 541 ml orange flavored with aspartame beverage (0 kJ, 0 kcal) or 1457 ml water | <i>Ad libitum</i> beverage intake from 6 hr before dinner | 595 vs 615                                        | -20                                                                              | <i>Ad libitum</i> intake<br><br>intake from lunch up until and during dinner |
| Beridot-Therond et al. <sup>(4)</sup>   | 24                 | 12 M / 12 F<br>20-25 y                                       | NW<br>NR                               | 541 ml orange flavored beverage with aspartame (0 kJ, 0 kcal) or 578 ml water  | <i>Ad libitum</i> beverage intake from 6 hr before dinner | 595 vs 647                                        | -52                                                                              | <i>Ad libitum</i> intake<br><br>intake from lunch up until and during dinner |
| King et al. <sup>(120)</sup>            | 16                 | 16 M / 0 F<br>21 y                                           | NW<br>NR                               | <i>Ad libitum</i> drink with aspartame /ace-K (50 kJ, 12 kcal) or water        | 10                                                        | 1520 vs 1358                                      | 174                                                                              |                                                                              |
| Holt et al. <sup>(123)</sup>            | 11                 | 11 M / 0 F<br>22 (3) y                                       | NW<br>NR                               | 375 ml diet coca cola + 40 g crushed ice (7 kJ, 2 kcal) or water               | 20                                                        | 490 vs 554                                        | -62                                                                              |                                                                              |

| <b>Adults</b>                                  | <b>Sample size</b> | <b>Gender, age (y)</b><br><br><b>(mean, SD/SEM or range)</b> | <b>Weight status, restraint status</b> | <b>LES and comparison preloads</b>                                                                                   | <b>Preload to test meal interval (min)</b> | <b>Intake test meal (kcal), LES vs comparison</b> | <b>Δ intake preload + test meal (kcal),<br/><br/>LES minus comparison (kcal)</b> | <b>Notes</b>                                                                                                                    |
|------------------------------------------------|--------------------|--------------------------------------------------------------|----------------------------------------|----------------------------------------------------------------------------------------------------------------------|--------------------------------------------|---------------------------------------------------|----------------------------------------------------------------------------------|---------------------------------------------------------------------------------------------------------------------------------|
| <b>Reference</b>                               |                    |                                                              |                                        |                                                                                                                      |                                            |                                                   |                                                                                  |                                                                                                                                 |
| Woodend & Anderson <sup>(124)</sup>            | 14                 | 14 M / 0 F<br>24 y                                           | NW / OW<br>NR                          | 300 ml of xx with 125 mg sucralose (0 kJ, 0 kcal) or water                                                           | 60                                         | 1066 vs 1101                                      | -35                                                                              |                                                                                                                                 |
| Delavalle et al. <sup>(125)</sup>              | 44                 | 0 M / 44 F<br>25 (20-56) y                                   | NW / OW<br>NR                          | 360 ml diet coke (0 kJ, 0 kcal) or water                                                                             | 0 min                                      | 795 vs 794                                        | 1                                                                                |                                                                                                                                 |
| Akhavan & Anderson <sup>(30)</sup><br>(Exp. 1) | 12                 | 12 M / 0 F,<br>29 y                                          | NW,<br>NR                              | 300 ml water with lemon juice added with sucralose (0 kJ, 0 kcal) or water                                           | 80                                         | 1120 vs 1320                                      | -100                                                                             |                                                                                                                                 |
| Appleton & Blundell <sup>(3)</sup>             | 10                 | 0 M / 10 F<br>X                                              | NW / OW<br>NR                          | 2 x 330 ml beverage with artificial sweeteners ( 42 kJ, 10 kcal) or water (0 kJ, 0 kcal) in the morning before lunch | 90 + 180                                   | 616 vs 577                                        | 49                                                                               | low LES consumers<br><br>test meal served 180 min after 1 <sup>st</sup> drink and 90 min after 2 <sup>nd</sup> drink (morning)  |
| Appleton & Blundell <sup>(3)</sup>             | 10                 | 0 M / 10 F<br>X                                              | NW / OW<br>NR                          | 2 x 330 ml beverage with artificial sweeteners (42 kJ, 10 kcal) or water (0 kJ, 0 kcal) in the morning before lunch  | 90 + 180                                   | 917 vs 913                                        | 14                                                                               | high LES consumers<br><br>test meal served 180 min after 1 <sup>st</sup> drink and 90 min after 2 <sup>nd</sup> drink (morning) |



| <b>Adults</b>                               | <b>Sample size</b> | <b>Gender, age (y)</b><br><br><b>(mean, SD/SEM or range)</b> | <b>Weight status, restraint status</b> | <b>LES and comparison preloads</b>                                                                                         | <b>Preload to test meal interval (min)</b> | <b>Intake test meal (kcal), LES vs comparison</b> | <b>Δ intake preload + test meal (kcal),<br/><br/>LES minus comparison (kcal)</b> | <b>Notes</b>                                                                                                                      |
|---------------------------------------------|--------------------|--------------------------------------------------------------|----------------------------------------|----------------------------------------------------------------------------------------------------------------------------|--------------------------------------------|---------------------------------------------------|----------------------------------------------------------------------------------|-----------------------------------------------------------------------------------------------------------------------------------|
| <b>Reference</b>                            |                    |                                                              |                                        |                                                                                                                            |                                            |                                                   |                                                                                  |                                                                                                                                   |
| Appleton & Blundell <sup>(3)</sup>          | 10                 | 0 M /10 F<br>X                                               | NW / OW<br>NR                          | 2 x 330 ml beverage with artificial sweeteners (42 kJ, 10 kcal) or water (0 kJ, 0 kcal) in the morning before evening meal | 90 + 180                                   | 605 vs 587                                        | 28                                                                               | low LES consumers<br><br>test meal served 180 min after 1 <sup>st</sup> drink and 90 min after 2 <sup>nd</sup> drink (afternoon)  |
| Appleton & Blundell <sup>(3)</sup>          | 10                 | 0 M /10 F<br>X                                               | NW / OW<br>NR                          | 2 x 330 ml beverage with artificial sweeteners (42 kJ, 10 kcal) or water (0 kJ, 0 kcal) in the morning before evening meal | 90 + 180                                   | 653 vs 681                                        | -18                                                                              | high LES consumers<br><br>test meal served 180 min after 1 <sup>st</sup> drink and 90 min after 2 <sup>nd</sup> drink (afternoon) |
| Akhavan et al. <sup>(130)</sup><br>(Exp. 1) | 14                 | 14 M / 0 F, 19-28 y                                          | NW,<br>NR                              | 300 ml of orange-flavored water with 0.13 g sucralose (0 kJ, 0 kcal) or orange-flavored water                              | 60                                         | 1319 vs 1418                                      | -99                                                                              |                                                                                                                                   |
| Ford et al. <sup>(139)</sup>                | 8                  | 7 M / 1 F<br>X                                               | NW<br>X                                | 50 ml of water with 42 mg sucralose (0 kJ,0 kcal) or 50 ml water                                                           | 60                                         | 620 vs 562                                        | 58                                                                               |                                                                                                                                   |

| <b>Adults</b>                    | <b>Sample size</b> | <b>Gender, age (y)</b><br><br><b>(mean, SD/SEM or range)</b> | <b>Weight status, restraint status</b> | <b>LES and comparison preloads</b>                                            | <b>Preload to test meal interval (min)</b> | <b>Intake test meal (kcal), LES vs comparison</b> | <b>Δ intake preload + test meal (kcal),<br/><br/>LES minus comparison (kcal)</b> | <b>Notes</b> |
|----------------------------------|--------------------|--------------------------------------------------------------|----------------------------------------|-------------------------------------------------------------------------------|--------------------------------------------|---------------------------------------------------|----------------------------------------------------------------------------------|--------------|
| <b>Reference</b>                 |                    |                                                              |                                        |                                                                               |                                            |                                                   |                                                                                  |              |
| Rogers et al. <sup>(131)</sup>   | 14                 | 14 M / 0 F<br>25 y                                           | NW<br>NR                               | 300 ml of blackcurrant juice with sucralose (8 kJ, 2 kcal) or water           | 20                                         | 1150 vs 1134                                      | 18                                                                               |              |
| Rogers et al. <sup>(131)</sup>   | 18                 | 0 M / 18 F<br>25 y                                           | NW<br>NR                               | 300 ml of blackcurrant juice with sucralose (8 kJ, 2 kcal) or water           | 20                                         | 808 vs 783                                        | 27                                                                               |              |
| Maersk et al. <sup>(132)</sup>   | 14                 | 7 M / 7 F<br>34 (9.2)                                        | OB<br>X                                | 500 ml of diet cola with aspartame (7,5 kJ, 2 kcal) or water                  | 240                                        | 1196 vs 1147                                      | 51                                                                               |              |
| Carvalho et al. <sup>(133)</sup> | 24                 | 13 m / 11 F<br>22 (2.33) y                                   | NW<br>NR                               | 500 ml of pineapple soda with sucralose (92 kJ, 22 kcal) or 500 ml water      | 150                                        | 1385 vs 1377                                      | 30                                                                               |              |
| Carvalho et al. <sup>(133)</sup> | 27                 | 13 M / 14 F<br>22 (1.84) y                                   | NW / OW<br>NR                          | 500 ml of sweetened beverage with sucralose (105 kJ, 25 kcal) or 500 ml water | 150                                        | 1485 vs 1335                                      | 175                                                                              |              |
| Carvalho et al. <sup>(133)</sup> | 27                 | 13 M / 14 F<br>22 (1.84) y                                   | NW / OW<br>NR                          | 500 ml of sweetened beverage with sucralose (105 kJ, 25 kcal) or 500 ml water | 150                                        | 1265 vs 1335                                      | -45                                                                              |              |

| <b>Adults</b>                  | <b>Sample size</b> | <b>Gender, age (y)</b><br><br>(mean, SD/SEM<br>or range) | <b>Weight status, restraint status</b> | <b>LES and comparison preloads</b>            | <b>Preload to test meal interval (min)</b> | <b>Intake test meal (kcal), LES vs comparison</b> | <b>Δ intake preload + test meal (kcal),<br/><br/>LES minus comparison (kcal)</b> | <b>Notes</b>                                                                            |
|--------------------------------|--------------------|----------------------------------------------------------|----------------------------------------|-----------------------------------------------|--------------------------------------------|---------------------------------------------------|----------------------------------------------------------------------------------|-----------------------------------------------------------------------------------------|
| Panahi et al. <sup>(134)</sup> | 29                 | 15 M / 14 F<br>22 (0.4) y                                | NW<br>NR                               | 373 g diet cola (0 kJ, 0 kcal) or 456 g water | 0                                          | 926 vs 962                                        | -36                                                                              | Beverages consumed <i>ad libitum</i><br><br>difference in intake diet cola and water NS |

EI, energy intake; LES, low energy sweetener; Δ, change (difference from baseline to last time point unless otherwise described).

**Table S10. Characteristics and results of short-term intervention studies comparing the effects on EI of LES versus nothing**

| <i>LES vs nothing</i>             | Sample size | Gender, age (y)<br><br>(mean, SD/SEM<br>or range) | Weight status, restraint status | LES and comparison preloads                                   | Preload to test meal interval (min) | Intake test meal (kcal), LES vs comparison | Δ cumulative intake (kcal),<br><br>LES minus comparison (kcal) | Notes |
|-----------------------------------|-------------|---------------------------------------------------|---------------------------------|---------------------------------------------------------------|-------------------------------------|--------------------------------------------|----------------------------------------------------------------|-------|
| Reference                         |             |                                                   |                                 |                                                               |                                     |                                            |                                                                |       |
| Rolls et al. <sup>(113)</sup>     | 13          | 13 M / 0 F<br>25 (4) y                            | NW<br>Non-dieting               | 237 ml drink with 0.11 g aspartame (21 kJ, 5 kcal) or nothing | 0                                   | 1022 vs 1083                               | -56                                                            |       |
| Rolls et al. <sup>(113)</sup>     | 13          | 13 M / 0 F<br>25 (4) y                            | NW<br>Non-dieting               | 473 ml drink 0.22 gaspartame (42 kJ, 10 kcal) or nothing      | 0                                   | 1113 vs 1083                               | 35                                                             |       |
| Rolls et al. <sup>(113)</sup>     | 13          | 13 M / 0 F<br>25 (4) y                            | NW<br>Non-dieting               | 237 ml drink with 0.11 g aspartame (21 kJ, 5 kcal) or nothing | 30                                  | 1083 vs 1053                               | 45                                                             |       |
| Rolls et al. <sup>(113)</sup>     | 13          | 13 M / 0 F<br>25 (4) y                            | NW<br>Non-dieting               | 473 ml drink 0.22 gaspartame (42 kJ, 10 kcal) or nothing      | 30                                  | 1138 vs 1053                               | 90                                                             |       |
| Rolls et al. <sup>(113)</sup>     | 13          | 13 M / 0 F<br>25 (4) y                            | NW<br>Non-dieting               | 237 ml drink with 0.11 g aspartame (21 kJ, 5 kcal) or nothing | 60                                  | 1211 vs 1150                               | 66                                                             |       |
| Rolls et al. <sup>(113)</sup>     | 13          | 13 M / 0 F<br>25 (4) y                            | NW<br>Non-dieting               | 473 ml drink 0.22 gaspartame (42 kJ, 10 kcal) or nothing      | 60                                  | 1140 vs 1150                               | -5                                                             |       |
| Monsivais et al. <sup>(126)</sup> | 37          | 19 M / 18 F<br>M: 23 (4) y<br>F: 23 (3) y         | M: NW /<br>OW<br>F: NW<br>NR    | 475 ml of xx with aspartame (8 kJ, 2 kcal) or nothing         | 120                                 | 1009 vs 1008                               | 3                                                              |       |

EI, energy intake; LES, low energy sweetener; Δ, change (difference from baseline to last time point unless otherwise described).

**Table S11. Characteristics and results of short-term intervention studies comparing the effects on EI of LES in capsules versus placebo capsules**

| <i>LES capsules</i>                        | Sample size | Gender, age (y)<br><br>(mean, SD/SEM<br>or range) | Weight status, restraint status   | LES and comparison preloads                                                                                        | Preload to test meal interval (min) | Intake test meal (kcal), LES vs comparison | Δ cumulative intake (kcal),<br><br>LES minus comparison (kcal) | Notes             |
|--------------------------------------------|-------------|---------------------------------------------------|-----------------------------------|--------------------------------------------------------------------------------------------------------------------|-------------------------------------|--------------------------------------------|----------------------------------------------------------------|-------------------|
| Rogers et al. <sup>(136)</sup><br>(Exp. 1) | 12          | 6 M / 6 F<br>18-26 y                              | NW<br>NR                          | 200 ml of water with 235 mg aspartame (21 kJ, 5 kcal) or water with 1.2 g corn flour (21 kJ, 5 kcal) in capsules   | 60                                  | 1088 vs 1263                               | -175                                                           |                   |
| Rogers et al. <sup>(136)</sup><br>(Exp. 2) | 15          | 5 M / 10 F<br>19-24 y                             | NW<br>NR                          | 200 ml of water with 235 mg of aspartame (4 kJ, 1 kcal) or water with 235 mg corn flour (4 kJ, 1 kcal) in capsules | 60                                  | 1329 vs 1467                               | -138                                                           |                   |
| Rogers et al. <sup>(136)</sup><br>(Exp. 2) | 15          | 5 M / 10 F<br>19-24 y                             | NW<br>NR                          | 200 ml of water with 470mg of aspartame (8 kJ, 2 kcal) or water with 235 mg corn flour (4 kJ, 1 kcal) in capsules  | 60                                  | 1317 vs 1467                               | -149                                                           |                   |
| Rogers et al. <sup>(136)</sup>             | 16          | 6 M / 10 F<br>20-37 y                             | N=15,<br>22.4,<br>N=1, 52.2<br>NR | 200 ml water with 400 mg aspartame (8 kJ, 2 kcal) or 400 mg of cornflour (8 kJ, 2 kcal) in capsules                |                                     | 533 vs 485                                 | -253                                                           |                   |
| Black et al. <sup>(138)</sup>              | 18          | 18 M / 0 F<br>19 y                                | NW<br>X                           | 280 ml of water with 340 mg aspartame in capsules (0 kcal) or water                                                | 60                                  | 1885 vs 1721                               | 165                                                            |                   |
| Rogers & Blundell <sup>(140)</sup>         | 26          | 13 M / 0 F<br>X                                   | NW<br>X                           | Aspartame (84 kJ, 20 kcal) or with 5.04 g alanine (84 kJ, 20                                                       | 60<br>(aspartame)/ 105              | 1103 vs 1330                               | -227                                                           | Between subjects, |

| <b>LES capsules</b>                | <b>Sample size</b> | <b>Gender, age (y)</b><br><br><b>(mean, SD/SEM or range)</b> | <b>Weight status, restraint status</b>   | <b>LES and comparison preloads</b>                                                                 | <b>Preload to test meal interval (min)</b> | <b>Intake test meal (kcal), LES vs comparison</b> | <b>Δ cumulative intake (kcal), LES minus comparison (kcal)</b> | <b>Notes</b>    |
|------------------------------------|--------------------|--------------------------------------------------------------|------------------------------------------|----------------------------------------------------------------------------------------------------|--------------------------------------------|---------------------------------------------------|----------------------------------------------------------------|-----------------|
|                                    |                    |                                                              |                                          | kcal) in capsules                                                                                  | (alanine)                                  |                                                   |                                                                | n=13/group      |
| Rogers & Blundell <sup>(140)</sup> | 13                 | 13 M / 0 F<br>X                                              | NW<br>X                                  | Aspartame 169 kJ, 40 kcal) or with 10.08 g alanine (169 kJ, 40 kcal) in capsules                   | 105                                        | 1124 vs 1232                                      | -108                                                           | Within subjects |
| Rogers et al <sup>(125)</sup>      | 12                 | 6 M / 6 F<br>18-30 y                                         | NW<br>Non-dieting                        | 50 ml water with 400 mg aspartame (8 kJ, 2 kcal) or 400 mg of cornflour (8 kJ, 2 kcal) in capsules | 5                                          | 785 vs 792                                        | -7                                                             |                 |
| Rogers et al. <sup>(141)</sup>     | 12                 | 6 M / 6 F<br>18-30 y                                         | NW<br>Non-dieting                        | 50 ml water with 400 mg aspartame (8 kJ, 2 kcal) or 400 mg of cornflour (8 kJ, 2 kcal) in capsules | 30                                         | 856 vs 814                                        | 42                                                             |                 |
| Rogers et al. <sup>(141)</sup>     | 12                 | 6 M / 6 F<br>18-30 y                                         | NW<br>Non-dieting                        | 50 ml water with 400 mg aspartame (8 kJ, 2 kcal) or 400 mg of cornflour (8 kJ, 2 kcal) in capsules | 60                                         | 705 vs 875                                        | -170                                                           |                 |
| Rogers et al. <sup>(142)</sup>     | 17                 | 10 M / 7 F<br>18-29 y                                        | Normal weight for height non-dieting, NR | 450 mg AceK (0 kcal) vs 500 mg cornflour (8 kJ, 2 kcal) in a capsule                               | 60                                         | 1033 vs 1045                                      | -14                                                            |                 |

| <b>LES capsules</b>            | <b>Sample size</b> | <b>Gender, age (y)</b><br><br><b>(mean, SD/SEM or range)</b> | <b>Weight status, restraint status</b>   | <b>LES and comparison preloads</b>                                              | <b>Preload to test meal interval (min)</b> | <b>Intake test meal (kcal), LES vs comparison</b> | <b>Δ cumulative intake (kcal), LES minus comparison (kcal)</b> | <b>Notes</b> |
|--------------------------------|--------------------|--------------------------------------------------------------|------------------------------------------|---------------------------------------------------------------------------------|--------------------------------------------|---------------------------------------------------|----------------------------------------------------------------|--------------|
| <b>Reference</b>               |                    |                                                              |                                          |                                                                                 |                                            |                                                   |                                                                |              |
| Rogers et al. <sup>(142)</sup> | 17                 | 10 M / 7 F<br>18-29 y                                        | Normal weight for height non-dieting, NR | 500 mg aspartame (8 kJ, 2 kcal) vs 500 mg cornflour (8 kJ, 2 kcal) in a capsule | 60                                         | 948 vs 1045                                       | -97                                                            |              |
| Rogers et al. <sup>(142)</sup> | 17                 | 10 M / 7 F<br>18-29 y                                        | Normal weight for height non-dieting, NR | 330 mg saccharin (0 kcal) vs 500 mg cornflour (8 kJ, 2 kcal) in a capsule       | 60                                         | 1028 vs 1045                                      | -19                                                            |              |
| Rogers et al. <sup>(142)</sup> | 17                 | 10 M / 7 F<br>18-29 y                                        | Normal weight for height non-dieting, NR | 150 mg sucralose (0 kcal) vs 500 mg cornflour (8 kJ, 2 kcal) in a capsule       | 60                                         | 1021 vs 1045                                      | -26                                                            |              |

EI, energy intake; LES, low energy sweetener; Δ, change (difference from baseline to last time point unless otherwise described)

**Tables S12. Results of meta-regression analyses for the short-term intervention studies**

**LES versus sugar**

| Factor                                            | B     | P      | 95% CI         |
|---------------------------------------------------|-------|--------|----------------|
| Gender (ref = Female)                             |       |        |                |
| Male                                              | 14.8  | 0.644  | -49.0 to 78.6  |
| Mixed                                             | -10.3 | 0.754  | -75.3 to 54.8  |
| Comparison preload (kcal)                         | -0.46 | <0.001 | -0.63 to -0.30 |
| Preload to test meal time interval (ref = 0 mins) |       |        |                |
| 0 to 30 mins                                      | 87.4  | 0.032  | 7.9 to 166.9   |
| >30 to 60 mins                                    | 66.4  | 0.086  | -9.7 to 142.4  |
| >60 mins                                          | 8.2   | 0.820  | -63.7 to 80.1  |
| Year                                              | -2.8  | 0.045  | -5.64 to -0.06 |

Residual  $I^2 = 69.2\%$   
 Adjusted  $R^2 = 47.8\%$



**LES versus sugar (COMPX)**

| Factor                                            | B     | P     | 95% CI        |
|---------------------------------------------------|-------|-------|---------------|
| Gender (ref = Female)                             |       |       |               |
| Male                                              | 3.07  | 0.863 | -32.4 to 38.6 |
| Mixed                                             | -16.7 | 0.366 | -53.4 to 20.0 |
| Comparison preload (kcal)                         | -0.04 | 0.348 | -0.12 to 0.04 |
| Preload to test meal time interval (ref = 0 mins) |       |       |               |
| 0 to 30 mins                                      | 49.2  | 0.036 | 3.3 to 95.1   |
| >30 to 60 mins                                    | 44.4  | 0.053 | -0.68 to 89.4 |
| >60 mins                                          | 9.2   | 0.663 | -32.9 to 51.4 |
| Year                                              | -1.31 | 0.098 | -2.86 to 0.25 |

Residual  $I^2 = 64.9\%$   
 Adjusted  $R^2 = 12.0\%$

**LES versus unsweetened**

| Factor                                            | B     | P     | 95% CI          |
|---------------------------------------------------|-------|-------|-----------------|
| Gender (ref = Female)                             |       |       |                 |
| Male                                              | -99.0 | 0.233 | -281.8 to 83.8  |
| Mixed                                             | 151.3 | 0.030 | 20.7 to 281.8   |
| Comparison preload (kcal)                         | 0.66  | 0.042 | 0.03 to 1.30    |
| Preload to test meal time interval (ref = 0 mins) |       |       |                 |
| 0 to 30 mins                                      | 216.3 | 0.071 | -24.7 to 457.3  |
| >30 to 60 mins                                    | 44.3  | 0.554 | -128.6 to 217.1 |
| >60 mins                                          | 27.4  | 0.719 | -149.9 to 204.6 |

Residual  $I^2 = 61.2\%$   
 Adjusted  $R^2 = 58.6\%$

**LES versus water**

| Factor                                            | B     | P     | 95% CI          |
|---------------------------------------------------|-------|-------|-----------------|
| Gender (ref = Female)                             |       |       |                 |
| Male                                              | 51.3  | 0.400 | -72.1 to 174.8  |
| Mixed                                             | -34.3 | 0.431 | -122.3 to 53.7  |
| Comparison preload (kcal)                         | -3.4  | 0.827 | -35.0 to 28.2   |
| Preload to test meal time interval (ref = 0 mins) |       |       |                 |
| 0 to 30 mins                                      | 42.6  | 0.499 | -85.0 to 170.3  |
| >30 to 60 mins                                    | 4.9   | 0.936 | -119.2 to 128.9 |
| >60 mins                                          | 57.6  | 0.421 | -87.2 to 202.4  |

Residual  $I^2 = 0.0\%$   
 Adjusted  $R^2 = 20.5\%$

**LES versus nothing**

Meta-regression not undertaken due to the small number of studies.

**LES in capsules versus placebo capsules**

| Factor                                            | B      | P     | 95% CI          |
|---------------------------------------------------|--------|-------|-----------------|
| Gender (ref = Female)                             |        |       |                 |
| Male                                              | N/A    | N/A   | N/A             |
| Mixed                                             | -307.6 | 0.017 | -524.6 to -90.7 |
| Comparison preload (kcal)                         | -6.9   | 0.082 | -15.1 to 1.4    |
| Preload to test meal time interval (ref = 0 mins) |        |       |                 |
| 0 to 30 mins                                      | N/A    | N/A   | N/A             |
| >30 mins                                          | -146.9 | 0.012 | -239.2 to -54.6 |
| Year                                              | 6.9    | 0.062 | -0.56 to 14.3   |

Residual  $I^2 = 0.0\%$   
 Adjusted  $R^2 = 100.0\%$

### **Sensitivity analyses for short-term intervention studies**

Sensitivity analyses were conducted to determine the effect of replacing missing SDs with those from other studies (as detailed in the Supplementary Information (SI)). The results are shown in the Table below. They indicate that the summary effect estimates were not affected by using less conservative replacement SD values. Also, the summary effect estimates were not affected by excluding studies which did not report SDs. The inclusion of results from repeated measures on the same participants in the estimation of summary effects (as detailed in the SI) attenuated the summary effect estimates slightly towards the null, but did not affect the overall findings of the meta-analyses.

**Table S13. Summary of sensitivity analyses for short-term intervention studies**

Main results: Imputation of missing SDs with maximum SDs

| Difference in total energy (overall) | Sensitivity analyses |                  |                  |                  |
|--------------------------------------|----------------------|------------------|------------------|------------------|
|                                      | Main results         | SA1              | SA2              | SA3              |
| <b>LES vs sugar</b>                  |                      |                  |                  |                  |
| Summary ES                           | -94 kcal             | -94 kcal         | -95 kcal         | -102 kcal        |
| 95% CI                               | -122 to -66 kcal     | -121 to -67 kcal | -124 to -67 kcal | -134 to -70 kcal |
| Number of comparisons                | 68                   | 68               | 62               | 118              |
| <b>LES vs unsweetened</b>            |                      |                  |                  |                  |
| Summary ES                           | 21 kcal              | 22 kcal          | 18 kcal          | 12 kcal          |
| 95% CI                               | -41 to 83 kcal       | -30 to 73 kcal   | -56 to 93 kcal   | -29 to 52 kcal   |
| Number of comparisons                | 13                   | 13               | 10               | 21               |
| <b>LES vs water</b>                  |                      |                  |                  |                  |
| Summary ES                           | -2 kcal              | -5 kcal          | 2 kcal           | -6 kcal          |
| 95% CI                               | -30 to 26 kcal       | -32 to 22 kcal   | -29 to 32 kcal   | -38 to 26 kcal   |
| Number of comparisons                | 35                   | 35               | 30               | 57               |
| <b>LES vs nothing</b>                |                      |                  |                  |                  |
| Summary ES                           | 18 kcal              | N/A*             | N/A*             | 22 kcal          |
| 95% CI                               | -32 to 69 kcal       |                  |                  | -32 to 77 kcal   |
| Number of comparisons                | 4                    |                  |                  | 7                |
| <b>LES in capsules</b>               |                      |                  |                  |                  |
| Summary ES                           | -69 kcal             | N/A*             | N/A*             | -77 kcal         |
| 95% CI                               | -140 to 3 kcal       |                  |                  | -176 to 23 kcal  |
| Number of comparisons                | 9                    |                  |                  | 13               |
| <b>Difference in COMPX (overall)</b> |                      |                  |                  |                  |
| <b>LES vs sugar</b>                  |                      |                  |                  |                  |
| Summary ES                           | 50.5%                | 51.1%            | 50.4%            | 51.7%            |
| 95% CI                               | 39.0% to 62.0%       | 39.9% to 62.4%   | 38.7% to 62.2%   | 37.9% to 65.5%   |
| Number of comparisons                | 68                   | 68               | 62               | 118              |

SA1: Imputation of missing SDs with mean SDs

SA2: Exclusion of studies with no reported SDs

SA3: Use of robust variance estimation to include repeated measures (where appropriate)

\*All studies reported SDs, therefore these sensitivity analyses were not undertaken

**Table S14. Characteristics and results of sustained intervention studies comparing the effects on EI and/or anthropometric measures of LES versus sugar and LES versus water**

| Reference                        | Design,<br>Location, n                                                                                | Subjects:<br>M/F, mean age<br>and BMI                     | Intervention<br>(nutritional<br>characteristics)                                                                                                                                    | Duration and n at<br>completion or follow-<br>up                                                                          | Blinding                    | Energy intake<br>(reported values)                                                                                               | Anthropometric<br>measures (reported<br>values)                                                                                                                                                                                                     |
|----------------------------------|-------------------------------------------------------------------------------------------------------|-----------------------------------------------------------|-------------------------------------------------------------------------------------------------------------------------------------------------------------------------------------|---------------------------------------------------------------------------------------------------------------------------|-----------------------------|----------------------------------------------------------------------------------------------------------------------------------|-----------------------------------------------------------------------------------------------------------------------------------------------------------------------------------------------------------------------------------------------------|
| *Kanders et al. <sup>(6)</sup>   | Parallel design<br>n=59:<br>LES (n=29) vs<br>control with<br>advice to avoid<br>LES (n=30)<br><br>USA | 13 M / 46 F,<br>46 y, BMI 37                              | LES (aspartame)<br>sweetened dairy<br>products in place of<br>unsweetened;<br>encouraged to use LES<br>table-top, soft drinks,<br>desserts<br><br>Control: advised to<br>avoid LES. | 12 wk weight loss (3-<br>wk run-in before<br>randomization to<br>treatment)<br><br>Completers n=55:<br>LES 28, Control 27 | Not blinded                 | Not reported                                                                                                                     | <b>ΔBW wk 0-12</b><br>LES: -7.9 kg<br>control - 7.6 kg<br><br><b>Δ %BW wk 0-12</b><br>LES: -7.8%<br>Control: -6.9%<br><br><b>ΔBMI units wk 0-12</b><br>LES: -2.9<br>Control: -2.6<br><br>Weighted mean<br>combined both genders<br>(data from n=54) |
| Tordoff & Alleva <sup>(17)</sup> | Cross-over<br>design<br>LES vs.<br>sucrose vs. no<br>beverage<br>n=41<br>randomized<br><br>USA        | 21 M / 9 F,<br>25 y, BMI 25.2<br><br>(Completers<br>only) | 4*300 ml soda/day:<br>LES: 3 kcal/day<br>SSB (sugar-control):<br>530 kcal/d<br>Control (no drink): No<br>soda                                                                       | 3 wk per treatment<br>counterbalanced<br>(9 wks in total)<br><br>Completers n=30                                          | Covert for<br>LES vs<br>SSB | <b>EI</b><br>LES: 2647 kcal/d<br>SSB: 3175 kcal/d<br>No-drink control: 2801 kcal/d<br><br>Weighted mean combined<br>both genders | <b>ΔBW</b><br>LES: -0.28 kg<br>SSB: +0.63 kg<br>No-drink control: +0.19<br><br>Weighted mean<br>combined both genders                                                                                                                               |



| Reference                                         | Design,<br>Location, n                                                                                                                        | Subjects:<br>M/F, mean age<br>and BMI                                                         | Intervention<br>(nutritional<br>characteristics)                                                                                                                      | Duration and n at<br>completion or follow-<br>up                                                                | Blinding                                                                  | Energy intake<br>(reported values)                                                                                                                                                                                                | Anthropometric<br>measures (reported<br>values)                 |
|---------------------------------------------------|-----------------------------------------------------------------------------------------------------------------------------------------------|-----------------------------------------------------------------------------------------------|-----------------------------------------------------------------------------------------------------------------------------------------------------------------------|-----------------------------------------------------------------------------------------------------------------|---------------------------------------------------------------------------|-----------------------------------------------------------------------------------------------------------------------------------------------------------------------------------------------------------------------------------|-----------------------------------------------------------------|
| Wolraich et al. <sup>(18)</sup>                   | Cross-over design<br>aspartame vs. saccharin vs. sucrose with pre-school (3-5 yr) and primary school children (6-10 yr)<br>n=58<br>randomized | M / F not reported,<br>preschool 4.7 yr, primary school 8.1 yr,<br>weight status not reported | Manipulated foods (a.o. fruit juice, cereals, pudding, yogurt, cookies, soft drinks) with Aspartame (Asp) Saccharin (Sacch) Sucrose (Sugar)                           | 3 wk per treatment counterbalanced (9 wks in total)<br><br>Completers n=48:<br>pre-school 25, primary school 23 | Covert, subjects blinded to treatments                                    | <b>Mean EI</b><br>Preschool children:<br>LES (Asp): 1604 kcal/d<br>LES (Sacch): 1587 kcal/d<br>Sucrose: 1847 kcal/d<br><br>Primary school children:<br>LES (Asp): 1936 kcal/d<br>LES (Sacch): 1980 kcal/d<br>Sucrose: 2221 kcal/d | <b>Not reported</b>                                             |
| Naismith & Rhodes <sup>(10)</sup><br>Experiment 2 | Parallel design<br>LES vs sugar<br>n=8                                                                                                        | 8 M / 0 F,<br>24 yr, BMI 21                                                                   | Experiment 2 only ((n=8):<br>LES: LES (aspartame, AceK) replaced sugar (equal to -451 kcal/d)<br>Control: Sugar used or supplemented to wide range of foods/beverages | 10 d/treatment<br>3 d run-in<br>(= 23 d total)<br><br>Completers n=8                                            | Covert, subjects blinded to treatments (foods provided in metabolic ward) | <b>ΔEI</b><br>LES vs sugar: -297 kcal                                                                                                                                                                                             | %ΔBW vs baseline<br>Overall mean LES vs sugar:<br><br>-0.051 kg |

| Reference                        | Design,<br>Location, n                                                                                     | Subjects:<br>M/F, mean age<br>and BMI | Intervention<br>(nutritional<br>characteristics)                                                                                                                            | Duration and n at<br>completion or follow-<br>up                                                                                                                                                                       | Blinding                                   | Energy intake<br>(reported values)                                                                                                                                                                                                                   | Anthropometric<br>measures (reported<br>values)                                                                                                                                                                                               |
|----------------------------------|------------------------------------------------------------------------------------------------------------|---------------------------------------|-----------------------------------------------------------------------------------------------------------------------------------------------------------------------------|------------------------------------------------------------------------------------------------------------------------------------------------------------------------------------------------------------------------|--------------------------------------------|------------------------------------------------------------------------------------------------------------------------------------------------------------------------------------------------------------------------------------------------------|-----------------------------------------------------------------------------------------------------------------------------------------------------------------------------------------------------------------------------------------------|
| *Blackburn et al. <sup>(6)</sup> | Parallel design<br>n=163:<br>LES (n= 82) vs<br>control with<br>caloric<br>sweeteners<br>(n=81).<br><br>USA | 0 M / 163 F,<br>42 y, BMI 37          | LES: Aspartame<br>products during active<br>weight loss,<br>encouraged to use LES<br>during follow-up<br><br>Control: Use of LES<br>products or substitution<br>discouraged | 3 wk run-in, 16 wk<br>weight loss (wks 4-19),<br>follow-up at weeks 71<br>and 175.<br><br>Wk 19: n=139 (LES<br>71, Control 65)<br><br>Wk 71: n=125 (LES<br>61, Control 64)<br><br>Wk 175: n=83 (LES<br>42, Control 41) | Blinding of<br>subjects<br>not<br>possible | <b>ΔEI wk 0-71:</b><br>LES: -2.45 MJ/d<br><br>(-585 kcal/d)<br><br>Control: -1.90 MJ/d<br><br>(-454 kcal/d)<br><br><b>ΔEI wk 19-71:</b><br>LES: +0.73 MJ/d(+174<br>kcal/d)<br><br>Control: +0.95 MJ/d(+227<br>kcal/d)<br><br>Wk 175: EI not reported | <b>ΔBW wk 0-175:</b><br>LES: -5.1 kg<br>Control: 0 kg (reported as<br>'no net change')<br><br><b>ΔBW wk 19-175:</b><br>LES: +5.4 kg<br>Control: +9.4 kg<br><br>Intention-to-treat analysis<br>per study phase (weight<br>loss or maintenance) |

| Reference                     | Design,<br>Location, n                                         | Subjects:<br>M/F, mean age<br>and BMI              | Intervention<br>(nutritional<br>characteristics)                                                                                                                                                                                                                      | Duration and n at<br>completion or follow-<br>up                                                                                                             | Blinding                                                     | Energy intake<br>(reported values)                                                             | Anthropometric<br>measures (reported<br>values)                                                                                                                         |
|-------------------------------|----------------------------------------------------------------|----------------------------------------------------|-----------------------------------------------------------------------------------------------------------------------------------------------------------------------------------------------------------------------------------------------------------------------|--------------------------------------------------------------------------------------------------------------------------------------------------------------|--------------------------------------------------------------|------------------------------------------------------------------------------------------------|-------------------------------------------------------------------------------------------------------------------------------------------------------------------------|
| *Raben et al. <sup>(13)</sup> | Parallel design<br>LES vs<br>sucrose<br>n=41<br><br>Denmark    | 6 M / 35 F,<br>35 y, BMI 27.8                      | LES: food and drinks<br>with LES<br><br>Control: similar food<br>and drinks with sucrose<br><br>Target: to replace<br>2g/kg/d sucrose with<br>LES (54% aspartame,<br>22% AceK, 23%<br>cyclamate, 1%<br>saccharin)<br><br>70% substituted via<br>drinks, 30% via foods | 10 wk<br><br>Completers n:<br><br>LES 20, Sucrose 21                                                                                                         | Covert,<br>Subjects<br>blinded to<br>treatments              | <b>ΔEI</b><br>LES: -0.44 MJ/d<br><br>(-105 kcal/d)<br>Sucrose: +1.71 MJ/d<br><br>(+408 kcal/d) | <b>ΔBW</b><br>LES: -1.0 kg<br>Sucrose: +1.6 kg<br><br><b>Δfat mass</b><br>LES: -0.7 kg<br>Sucrose: +1.3 kg<br><br><b>Δlean mass</b><br>LES: -0.3 kg<br>Sucrose: +0.3 kg |
| *Reid et al. <sup>(14)</sup>  | Parallel design<br>LES vs SSB<br>n=161<br>randomized<br><br>UK | 0 M / 133 F,<br>32 y, BMI 22.5<br><br>(Completers) | 4 x 250 ml drinks/d<br>sweetened with<br>aspartame or sucrose<br><br>LES: 0.07 MJ/d<br>Control: 1.8 MJ/d                                                                                                                                                              | 4 wk,<br>1 wk baseline<br>(5 wk in total) ,<br><br>Completers n=133<br><br>(Correctly informed:<br>LES 33, sucrose 33;<br>Misinformed LES 32,<br>sucrose 35) | Subjects<br>'correctly<br>informed'<br>or 'mis-<br>informed' | <b>ΔEI</b><br>LES: -0.39 MJ/d<br><br>(-93 kcal/d)<br>SSB: +0.79 MJ/d<br>(+189 kcal/d)          | <b>ΔBW</b><br>LES: -0.37 kg<br>SSB: +0.08 kg<br><br>Data from correctly<br>informed subjects only,<br>provided by authors                                               |

| Reference                     | Design,<br>Location, n                                                                 | Subjects:<br>M/F, mean age<br>and BMI                       | Intervention<br>(nutritional<br>characteristics)                                          | Duration and n at<br>completion or follow-<br>up                                                     | Blinding                                                     | Energy intake<br>(reported values)                                                    | Anthropometric<br>measures (reported<br>values)                                                                                                      |
|-------------------------------|----------------------------------------------------------------------------------------|-------------------------------------------------------------|-------------------------------------------------------------------------------------------|------------------------------------------------------------------------------------------------------|--------------------------------------------------------------|---------------------------------------------------------------------------------------|------------------------------------------------------------------------------------------------------------------------------------------------------|
| *Njike et al. <sup>(11)</sup> | Cross-over<br>design<br><br>LES cocoa vs<br>SSB cocoa<br>comparison<br>n=37<br><br>USA | 6 M / 31 F,<br>52 y, BMI 30.3                               | 2/d cocoa beverage<br>with LES (90 kcal/d) or<br>sugar control (460<br>kcal/d)            | 6 wk/treatment,<br>4 wk washouts<br>(26 wks in total)<br><br>Completers n:<br><br>LES 32, Control 33 | Double-<br>blind,<br>covert                                  | <b>Mean EI</b><br>LES: 1779 kcal/d<br>SSB: 1991 kcal/d                                | <b>ΔBW</b><br>LES: 0.0 kg<br>SSB: +0.2 kg<br><br><b>ΔBMI</b><br>LES: 0.0<br>SSB: +0.1<br><br><b>Δ waist circumf.</b><br>LES: -1.8 cm<br>SSB: -1.3 cm |
| *Reid et al. <sup>(122)</sup> | Parallel design<br>LES vs SSB<br><br>n=71<br>randomized<br><br>UK                      | 0 M / 71 F,<br>34 y, BMI 27.5<br>with history of<br>dieting | 4*250 ml drinks<br>sweetened with<br>aspartame (0.07 MJ/d)<br>or sucrose (1.8 MJ/d)       | 4 wk,<br>1 wk baseline<br>(5 wk in total)<br><br>Completers n=53:<br><br>LES 29, sucrose 24          | Subjects<br>'correctly<br>informed'<br>or 'mis-<br>informed' | <b>ΔEI</b><br>LES: -0.67 MJ/d<br><br>(-160 kcal/d)<br>SSB: -0.14 MJ/d<br>(-33 kcal/d) | <b>ΔBW</b><br><br>LES: 0.08 kg<br>SSB: +0.57 kg<br><br>Data provided by authors                                                                      |
| *Maersk et al. <sup>(9)</sup> | Parallel design<br>LES vs SSB<br>n=22<br><br>Denmark                                   | 9 M / 13 F<br><br>39 y, BMI 32.1                            | LES: 1 L/d of LES cola<br>(45 kcal/d)<br><br>Control: 1 L/d of SSB<br>cola (430 kcal/day) | 6 months<br><br>Completers n=22:<br><br>LES 12, SSB 10                                               | Covert,<br>subjects<br>'blind' to<br>treatments              | Not reported                                                                          | <b>%ΔBW vs baseline</b><br>LES: +0.114%<br>SSB: +1.28%<br><br><b>Δfat mass vs baseline</b><br>LES: -0.052 kg<br>SSB: +3.14 kg                        |

| Reference                                                   | Design,<br>Location, n                                                           | Subjects:<br>M/F, mean age<br>and BMI                                         | Intervention<br>(nutritional<br>characteristics)                                                                                         | Duration and n at<br>completion or follow-<br>up           | Blinding                             | Energy intake<br>(reported values) | Anthropometric<br>measures (reported<br>values)                                                                                                                       |
|-------------------------------------------------------------|----------------------------------------------------------------------------------|-------------------------------------------------------------------------------|------------------------------------------------------------------------------------------------------------------------------------------|------------------------------------------------------------|--------------------------------------|------------------------------------|-----------------------------------------------------------------------------------------------------------------------------------------------------------------------|
| *Maersk et al. <sup>(9)</sup><br><br>LES v Water comparison | Parallel design<br>LES vs water<br>n=25<br><br>Denmark                           | 8 M / 17 F<br><br>39 y, BMI 32.6                                              | LES: 1 L/d of LES cola<br>(45 kcal/d)<br><br>Control: 1 L/d of water<br>(0 kcal/d)                                                       | Completers n=22:<br><br>LES 12, water 13                   | Subjects<br>'blind' to<br>treatments | Not reported                       | <b>%ΔBW vs baseline</b><br>LES: +0.114%<br><br>Water: +0.576%<br><br><b>Δfat mass vs baseline</b><br>LES: -0.052<br><br>Water: +0.49 kg                               |
| *De Ruyter et al. <sup>(7)</sup>                            | Parallel design<br>n=641:<br>LES (n=319)<br>vs SSB<br>(n=322)<br><br>Netherlands | 340 M / 301 F,<br>8 y, BMI z-score<br>0.03<br>(SD units vs.<br>national mean) | Once 250 ml/d drinks<br>with LES<br>(34 mg sucralose/12<br>mg AceK) vs.<br>control with sucrose.<br><br>LES: 0 kcal/d<br>SSB: 104 kcal/d | 18 months<br><br>Completers n=477:<br><br>LES 225, SSB 252 | Double-<br>blind                     | Not reported                       | <b>ΔBMI z-score</b><br>LES: +0.02<br>SSB: +0.15<br><br><b>ΔBW</b><br>LES: +6.35 kg,<br>SSB: +7.37 kg<br><br>Data for completers and<br>imputed for non-<br>completers |

| Reference                                                                 | Design,<br>Location, n                                                                                                                | Subjects:<br>M/F, mean age<br>and BMI                                             | Intervention<br>(nutritional<br>characteristics)                                                                                                                             | Duration and n at<br>completion or follow-<br>up          | Blinding                                   | Energy intake<br>(reported values)                     | Anthropometric<br>measures (reported<br>values)                                                                                                   |
|---------------------------------------------------------------------------|---------------------------------------------------------------------------------------------------------------------------------------|-----------------------------------------------------------------------------------|------------------------------------------------------------------------------------------------------------------------------------------------------------------------------|-----------------------------------------------------------|--------------------------------------------|--------------------------------------------------------|---------------------------------------------------------------------------------------------------------------------------------------------------|
| *Tate et al. <sup>(16)</sup><br>CHOICE trial<br>LES v SSB<br>comparison   | Parallel design<br>n=210:<br>Substituting<br>SSB with LES<br>(n=105) vs<br>control (n=105,<br>no specific<br>substitution)<br><br>USA | 38 M/ 172 F, 41<br>yr, BMI 36.2,<br>consuming ≥280<br>kcal/d from<br>beverages    | Substitute ≥2<br>servings/d (≥200 kcal/d)<br>of SSB with LES vs<br>'dietary advice' with no<br>specific beverage<br>advice or intervention in<br>a weight control<br>program | 6 months<br><br>Completers n=181:<br><br>LES 93, SSB 88   | Blinding of<br>subjects<br>not<br>possible | <b>ΔEI</b><br><br>LES: -658 kcal/d<br>SSB: -581 kcal/d | <b>ΔBW</b><br>LES: -2.6 kg<br>SSB: -1.9 kg<br><br><b>Δwaist circumference</b><br>LES: -2.1 cm<br>SSB: -2.1 cm<br><br>Intention-to-treat analysis  |
| *Tate et al. <sup>(16)</sup><br>CHOICE trial<br>LES v Water<br>comparison | Parallel design<br>n=213:<br>substituting<br>SSB with LES<br>(n=105) vs<br>water (n=108)<br><br>USA                                   | 35 M/ 178 F,<br>42 yr,<br>BMI 35.8,<br>consuming ≥280<br>kcal/d from<br>beverages | Substitute ≥2<br>servings/d (≥200 kcal/d)<br>of caloric beverages<br>with LES vs water in a<br>weight control program                                                        | 6 months<br><br>Completers n=184:<br><br>LES 93, water 91 | Blinding of<br>subjects<br>not<br>possible | <b>ΔEI</b><br>LES: -658 kcal/d<br>Water: -532 kcal/d   | <b>ΔBW</b><br>LES: -2.6 kg<br>Water: -1.9 kg<br><br><b>Δwaist circumference</b><br>LES: -2.1 cm<br>Water: -2.0 cm<br><br>Intent to treat analysis |

| Reference                      | Design,<br>Location, n                                                     | Subjects:<br>M/F, mean age<br>and BMI                                                 | Intervention<br>(nutritional<br>characteristics)                                                                                                                                                                                                | Duration and n at<br>completion or follow-<br>up        | Blinding                                   | Energy intake<br>(reported values) | Anthropometric<br>measures (reported<br>values)                                                                                                                                               |
|--------------------------------|----------------------------------------------------------------------------|---------------------------------------------------------------------------------------|-------------------------------------------------------------------------------------------------------------------------------------------------------------------------------------------------------------------------------------------------|---------------------------------------------------------|--------------------------------------------|------------------------------------|-----------------------------------------------------------------------------------------------------------------------------------------------------------------------------------------------|
| *Peters et al. <sup>(12)</sup> | Parallel design<br>n=303:<br>LES (n=154)<br>vs water<br>(n=149)<br><br>USA | 255F/48M,<br>48 yr, BMI 33.7,<br>consuming at<br>least 3 LES<br>beverages per<br>week | Intervention carried out<br>within a behavioral<br>weight loss treatment<br>program<br><br>LES: Counselling to<br>consume $\geq 24$ US<br>ounces (710 ml) LES<br>beverages per day<br><br>Water: Same but water<br>(and avoid LES<br>beverages) | 12 weeks<br><br>Completers n=279:<br>LES 145, water 134 | Blinding of<br>subjects<br>not<br>possible | Not reported                       | <b><math>\Delta</math>BW</b><br>LES: -5.95 kg,<br>Water: -4.09 kg<br><br><b><math>\Delta</math>waist circumference</b><br>LES: -5.73 cm<br>Water: -4.36 cm<br><br>Intention-to-treat analysis |

\* - included in the meta-analysis

SSB = sugars-sweetened beverages (includes pure fruit juice)

LES = low energy sweetener

$\Delta$  = Change (difference from baseline to last time point unless otherwise described)

EI = Energy intake

BW = Body Weight, kg

**Table S15. Results of meta-regression analyses for the sustained intervention studies**

| Factor                                | B     | P     | 95% CI        |
|---------------------------------------|-------|-------|---------------|
| Length of follow-up (months)          | -0.09 | 0.179 | -0.25 to 0.07 |
| Gender (ref = Female)                 |       |       |               |
| Male                                  | N/A   | N/A   | N/A           |
| Mixed                                 | 1.08  | 0.484 | -3.25 to 5.42 |
| Weight category (ref = Normal weight) |       |       |               |
| Overweight                            | -1.36 | 0.376 | -5.52 to 2.81 |
| Obese                                 | -1.01 | 0.538 | -5.67 to 3.64 |

Residual  $I^2 = 87.0\%$   
 Adjusted  $R^2 = 40.7\%$



**Table S16. Summary of sensitivity analyses for sustained intervention studies**

|                     | Sensitivity analyses |                   |                   |
|---------------------|----------------------|-------------------|-------------------|
|                     | Main results         | SA1               | SA2               |
| <b>LES vs sugar</b> |                      |                   |                   |
| Summary ES          | -1.35 kg             | -1.32 kg          | -1.43 kg          |
| 95% CI              | -2.28 to -0.42 kg    | -2.23 to -0.42 kg | -2.41 to -0.45 kg |
| Number of studies   | 9                    | 9                 | 8                 |

Main results: Imputation of missing SDs with maximum SDs

SA1: Imputation of missing SDs with mean SDs

SA2: Exclusion of studies with no reported SDs

Sensitivity analyses were conducted to examine the influence of using imputed missing SDs on the overall effect estimates. The results are summarised in the Table below. They revealed only negligible differences between the magnitude of estimates from the main analyses and those from the sensitivity analyses, and no difference in direction of effect. This suggests that the imputed SDs did not substantially alter the results of the analysis.

**Table S17. Summary of risk of bias assessments for the sustained intervention studies**

|                                   | Sequence generation | Allocation concealment | Blinding of participants | Blinding of personnel | Blinding of outcome assessors | Completeness of outcome data | Selective outcome reporting |
|-----------------------------------|---------------------|------------------------|--------------------------|-----------------------|-------------------------------|------------------------------|-----------------------------|
| Kanders et al. <sup>(8)</sup>     | ?                   | ?                      | - <sup>a</sup>           | - <sup>a</sup>        | ?                             | + <sup>b</sup>               | ?                           |
| Tordoff & Alleva <sup>(17)</sup>  | ?                   | ?                      | +                        | ?                     | ?                             | - <sup>c</sup>               | + <sup>d</sup>              |
| Wolraich et al. <sup>(18)</sup>   | +                   | + <sup>f</sup>         | +                        | +                     | +                             | - <sup>f</sup>               | ? <sup>e</sup>              |
| Naismith & Rhodes <sup>(10)</sup> | ?                   | ?                      | +                        | - <sup>a</sup>        | ?                             | +                            | + <sup>d</sup>              |
| Blackburn et al. <sup>(6)</sup>   | +                   | ?                      | - <sup>a</sup>           | - <sup>a</sup>        | ?                             | +                            | + <sup>d</sup>              |
| Raben et al. <sup>(143)</sup>     | ?                   | ?                      | - <sup>a</sup>           | - <sup>a</sup>        | ?                             | +                            | + <sup>d,g</sup>            |
| Reid et al. <sup>(14)</sup>       | ?                   | ?                      | -                        | ?                     | ?                             | - <sup>c</sup>               | + <sup>h</sup>              |
| Nijke et al. <sup>(11)</sup>      | +                   | ?                      | +                        | +                     | +                             | +                            | +                           |
| Reid et al. <sup>(15)</sup>       | ?                   | ?                      | -                        | ? <sup>i</sup>        | ? <sup>i</sup>                | - <sup>c</sup>               | + <sup>h</sup>              |
| Maersk et al. <sup>(9)</sup>      | ?                   | ?                      | - <sup>a</sup>           | -                     | ?                             | - <sup>j</sup>               | + <sup>f</sup>              |
| de Ruyter et al. <sup>(7)</sup>   | +                   | +                      | +                        | +                     | +                             | +                            | + <sup>f</sup>              |
| Tate et al. <sup>(16)</sup>       | +                   | +                      | - <sup>a</sup>           | ? <sup>i</sup>        | ? <sup>i</sup>                | + <sup>k</sup>               | + <sup>f</sup>              |
| Peters et al. <sup>(12)</sup>     | +                   | ?                      | - <sup>a</sup>           | -                     | - <sup>l</sup>                | +                            | + <sup>f</sup>              |

+ / - / ? = Assessed that criterion has been met (+) / not met (-) / could not be determined (?)

<sup>a</sup> Not possible due to nature of intervention

<sup>b</sup> No intention-to-treat (ITT) analysis but dropouts <10% of randomized population

<sup>c</sup> No ITT analysis but dropouts >10% of randomized population

<sup>d</sup> No registered protocol, but the list in methods includes the variables relevant to energy balance (potential to explain group differences), and all are reported in outcomes. It is conceivable other variables were measured, but these are unlikely to be a source of bias for EI or BW outcomes.

<sup>e</sup> It is conceivable that other variables (e.g. body weight) were measured and not reported

<sup>f</sup> Relevant outcomes for energy balance reported as per registered protocol

<sup>g</sup> Complete for relevant outcomes but DEXA data were not used and the measurement of energy metabolism in a subset of participants is not reported but described in a later paper

<sup>h</sup> Body weight numerical data not reported but accessed from authors

<sup>i</sup> Described as "single blind" but does not explicitly state who was blinded

<sup>j</sup> Attrition imbalanced between groups, missing values not imputed

<sup>k</sup> ITT on all analyses except blood pressure and glucose

<sup>l</sup> Group leaders recording outcomes were likely to be aware of assignment

**Table S18. Summary of methodological quality assessment for sustained intervention studies**

|                                   | Similar on baseline characteristics | Power calculation conducted | Power reached    | Withdrawal numbers reported?<br>By group? | Reasons for withdrawals reported? / By group? |
|-----------------------------------|-------------------------------------|-----------------------------|------------------|-------------------------------------------|-----------------------------------------------|
| Kanders et al. <sup>(8)</sup>     | Y <sup>a</sup>                      | NA <sup>b</sup>             | NA               | Y/Y                                       | Y/Y                                           |
| Tordoff & Alleva <sup>(17)</sup>  | NA                                  | NR                          | NR               | Y/NA                                      | Y/NA                                          |
| Wolraich et al. <sup>(18)</sup>   | NA                                  | NR                          | NR               | Y/NA                                      | Y/NA                                          |
| Naismith & Rhodes <sup>(10)</sup> | NA                                  | NR                          | NR               | NA                                        | NA                                            |
| Blackburn et al. <sup>(6)</sup>   | Y                                   | Y                           | ?                | Y/Y                                       | Y/N                                           |
| Raben et al. <sup>(13)</sup>      | Y                                   | NR                          | NR               | NR                                        | NR                                            |
| Reid et al. <sup>(14)</sup>       | ? <sup>c</sup>                      | Y                           | ?                | Y/N                                       | Y/N                                           |
| Nijke et al. <sup>(11)</sup>      | Y                                   | Y                           | ?                | Y/Y                                       | Y/Y                                           |
| Reid et al. <sup>(15)</sup>       | Y                                   | Y                           | N <sup>d</sup>   | N/N                                       | N/N                                           |
| Maersk et al. <sup>(9)</sup>      | N <sup>e</sup>                      | NR                          | NR               | Y/Y                                       | N/N                                           |
| de Ruyter et al. <sup>(7)</sup>   | Y <sup>f</sup>                      | Y                           | Y                | Y/Y                                       | Y/Y                                           |
| Tate et al. <sup>(16)</sup>       | Y                                   | Y                           | NR               | Y/Y                                       | N/N                                           |
| Peters et al. <sup>(12)</sup>     | Y                                   | Y                           | N <sup>d,g</sup> | Y/Y                                       | N/N                                           |

Y = yes, N = No, NR= not reported, NA= not applicable, ? = unclear

<sup>a</sup>Control group had lower LES intake at baseline

<sup>b</sup>Feasibility trial, no power calculation applicable

<sup>c</sup>Not reported by treatment (sucrose and LES) group

<sup>d</sup>Fell below sample size calculation

<sup>e</sup>Unequal distribution of genders across treatments

<sup>f</sup>Slight difference in parental levels of education

<sup>g</sup>Powered for n=150 per group but fell to n=149 in water group

### Comparison of the present review with Miller and Perez<sup>(144)</sup>

Miller and Perez<sup>(144)</sup> also reviewed prospective cohort and sustained intervention studies on LES and body weight. They did not review relevant evidence from animal studies, or from short-term intervention studies on effects of LES on food intake. With respect to the prospective cohort and sustained intervention studies there are differences in the data or studies included in our review and Miller and Perez’s review as summarized below in **Tables S19 and S20**.

**Table S19. Prospective cohort studies that differed in inclusion/exclusion between the present review and the review by Miller and Perez<sup>(144)</sup>**

| Study                           | Present review | Miller and Perez | Comments                                                                          |
|---------------------------------|----------------|------------------|-----------------------------------------------------------------------------------|
| Chen <sup>(26)</sup>            | Included       | Not included     |                                                                                   |
| Colditz <sup>(145)</sup>        | Excluded       | Included         | Excluded as Pan et al included a more recent and detailed analysis of this cohort |
| Duffey <sup>(27)</sup>          | Included       | Not included     |                                                                                   |
| Johnson <sup>(146)</sup>        | Excluded       | Included         | Excluded as less than 500 subjects                                                |
| Ludwig <sup>(28)</sup>          | Included       | Not included     |                                                                                   |
| Newby <sup>(147)</sup>          | Excluded       | Included         | Excluded as follow up less than one year                                          |
| Pan <sup>(22)</sup>             | Included       | Not included     |                                                                                   |
| Parker <sup>(148)</sup>         | Excluded       | Included         | Excluded as less than 500 subjects                                                |
| Schulze <sup>(149)</sup>        | Excluded       | Included         | Excluded as Pan et al included a more recent and detailed analysis of this cohort |
| Striegel- Moore <sup>(23)</sup> | Included       | Not included     |                                                                                   |
| Vaneslow <sup>(30)</sup>        | Included       | Not included     |                                                                                   |

**Table S20. Sustained intervention studies that differed in inclusion/exclusion between the present review and the review by Miller and Perez<sup>(144)</sup>.**

In addition, Peters et al.<sup>(12)</sup> in the present review was published after the Miller and Perez<sup>(144)</sup> cut-off date.

| Study                                | Present review                             | Miller and Perez                          | Comments                                                                                                                                                                                                                                                    |
|--------------------------------------|--------------------------------------------|-------------------------------------------|-------------------------------------------------------------------------------------------------------------------------------------------------------------------------------------------------------------------------------------------------------------|
| Knopp <sup>(150)</sup>               | Excluded                                   | Included in meta-analysis                 | Aspartame versus lactose capsules. While relevant to understanding mechanisms, we excluded on the grounds that this is not how LES are consumed in the diet.                                                                                                |
| Tordoff and Alleva <sup>(17)</sup>   | Included in narrative section only         | Included in meta-analysis                 | Below our cut-off duration of 4 weeks for inclusion in meta-analysis                                                                                                                                                                                        |
| Naismith and Rhodes <sup>(10)</sup>  | Included in narrative section only         | Excluded                                  | Below Miller and Perez's cut-off duration of 2 weeks and our cut-off duration of 4 weeks for inclusion in meta-analysis                                                                                                                                     |
| Blackburn et al. <sup>(6)</sup>      | Week 175 results included in meta-analysis | Week 19 results included in meta-analysis | This study had an active weight loss period of 19 weeks with follow-ups at weeks 71 and 175. Participants were advised to continue their intervention throughout. We included the data for the last available intervention measurement as per our protocol. |
| Gatenby et al. <sup>(151)</sup>      | Excluded                                   | Included in meta-analysis                 | Participants were advised to reduce sugar intake in general, and not only through replacement with LES                                                                                                                                                      |
| Gostner et al. <sup>(152)</sup>      | Excluded                                   | Included in meta-analysis                 | Sweetener investigated was isomalt, which has an energy value of 2.1 kcal/g and approximately half that of sucrose, so not a LES by our definition                                                                                                          |
| Ebbeling et al. <sup>(153,154)</sup> | Excluded                                   | Included in meta-analysis                 | These were mixed interventions. Participants were offered LES or water (versus sugar-sweetened beverages), and these were not separated in the analyses                                                                                                     |

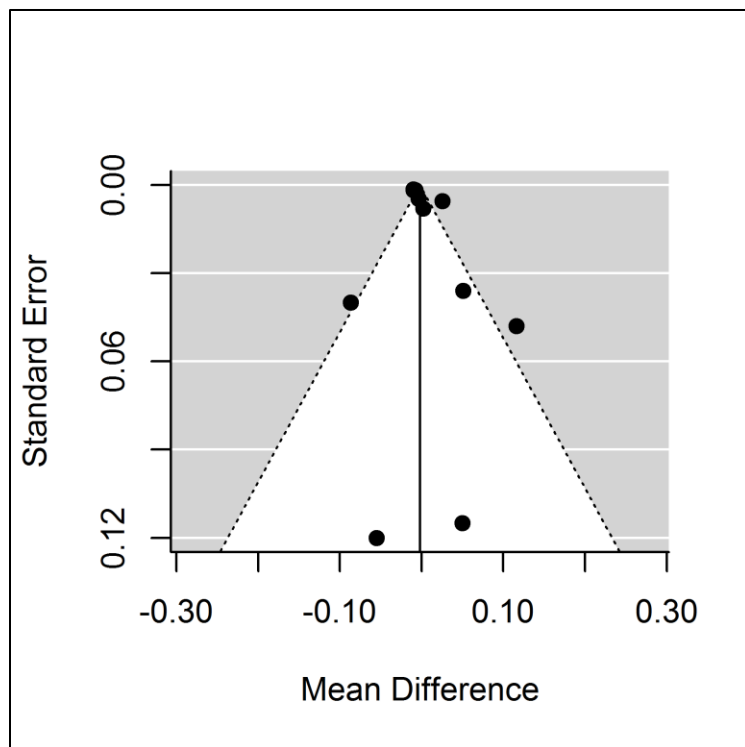

**Figure S1. Funnel plot of prospective cohort studies reporting information on association between LES consumption and body weight status change.**

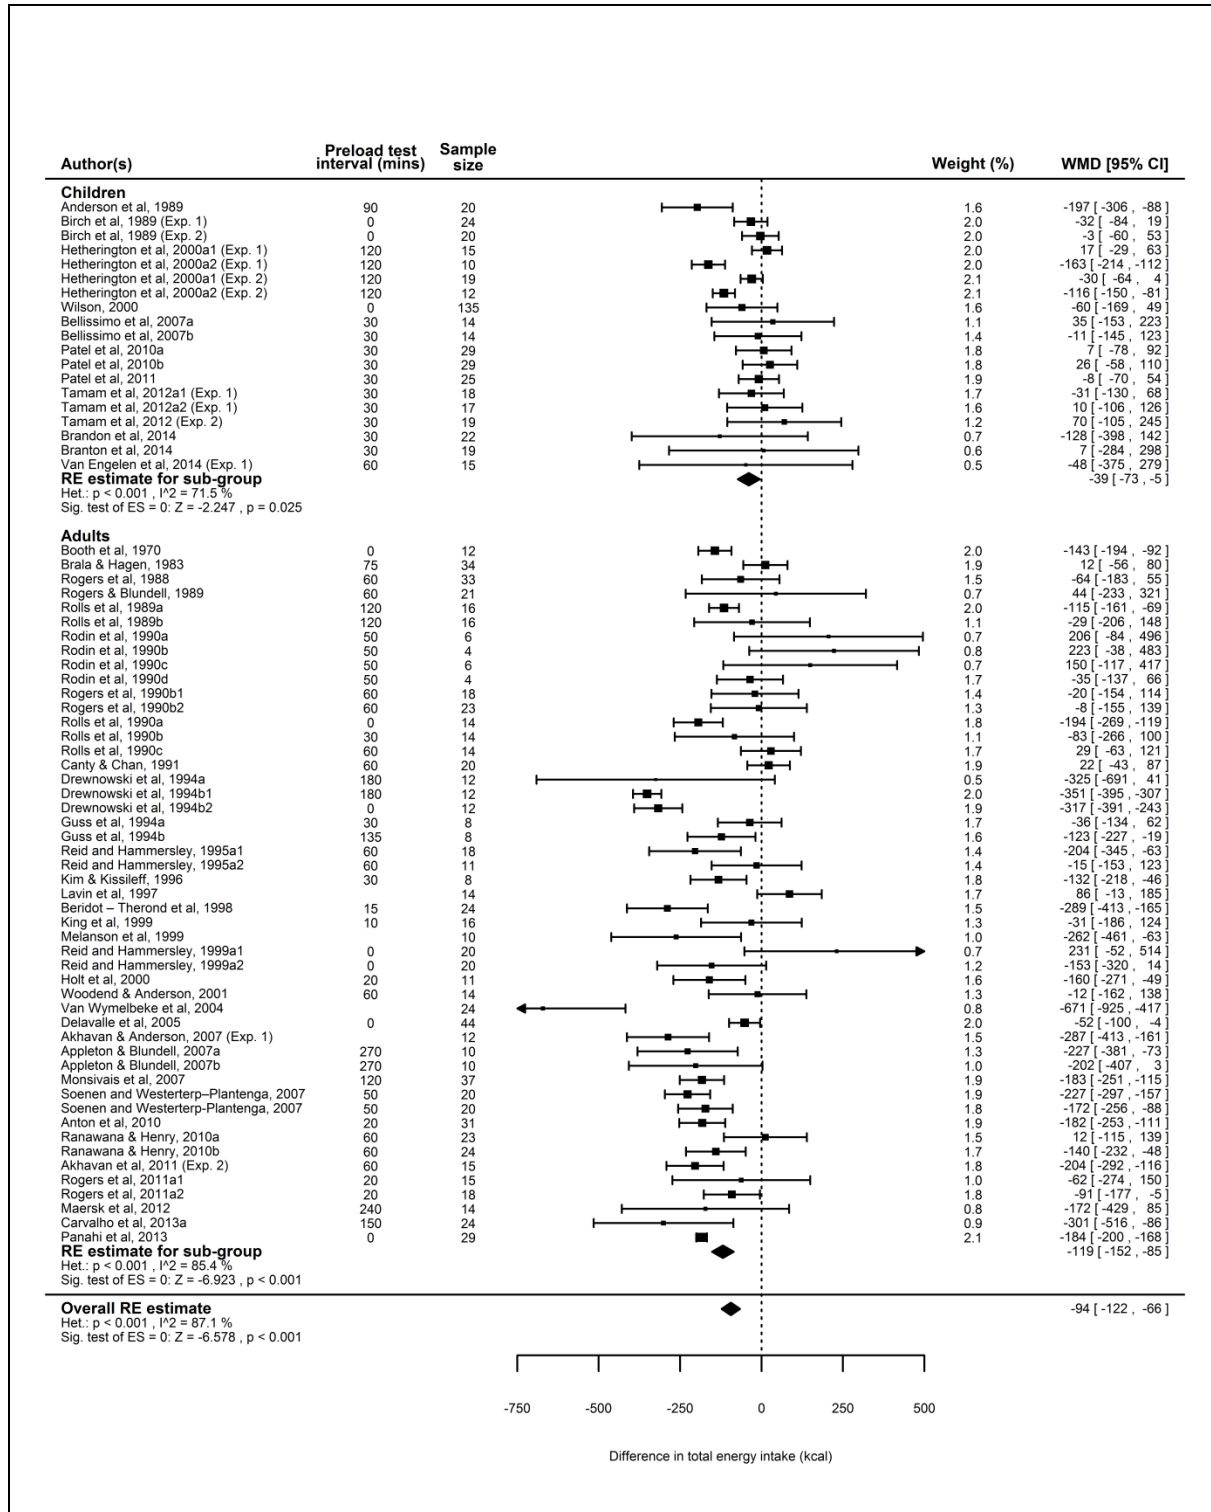

Figure S2. Forest plot of short-term intervention studies comparing the effects on EI of LES versus sugar in children and in adults.

Difference in total EI is the difference in cumulative EI (preload plus test meal) for the LES condition minus the sugar condition. Squares represent mean difference in EI for the individual comparisons; square size is proportional to the weight of each comparison; horizontal lines represent 95% CIs; diamonds represent the summary estimates and 95% CIs from random effects models for comparisons in children and adults separately and for all of the comparisons.



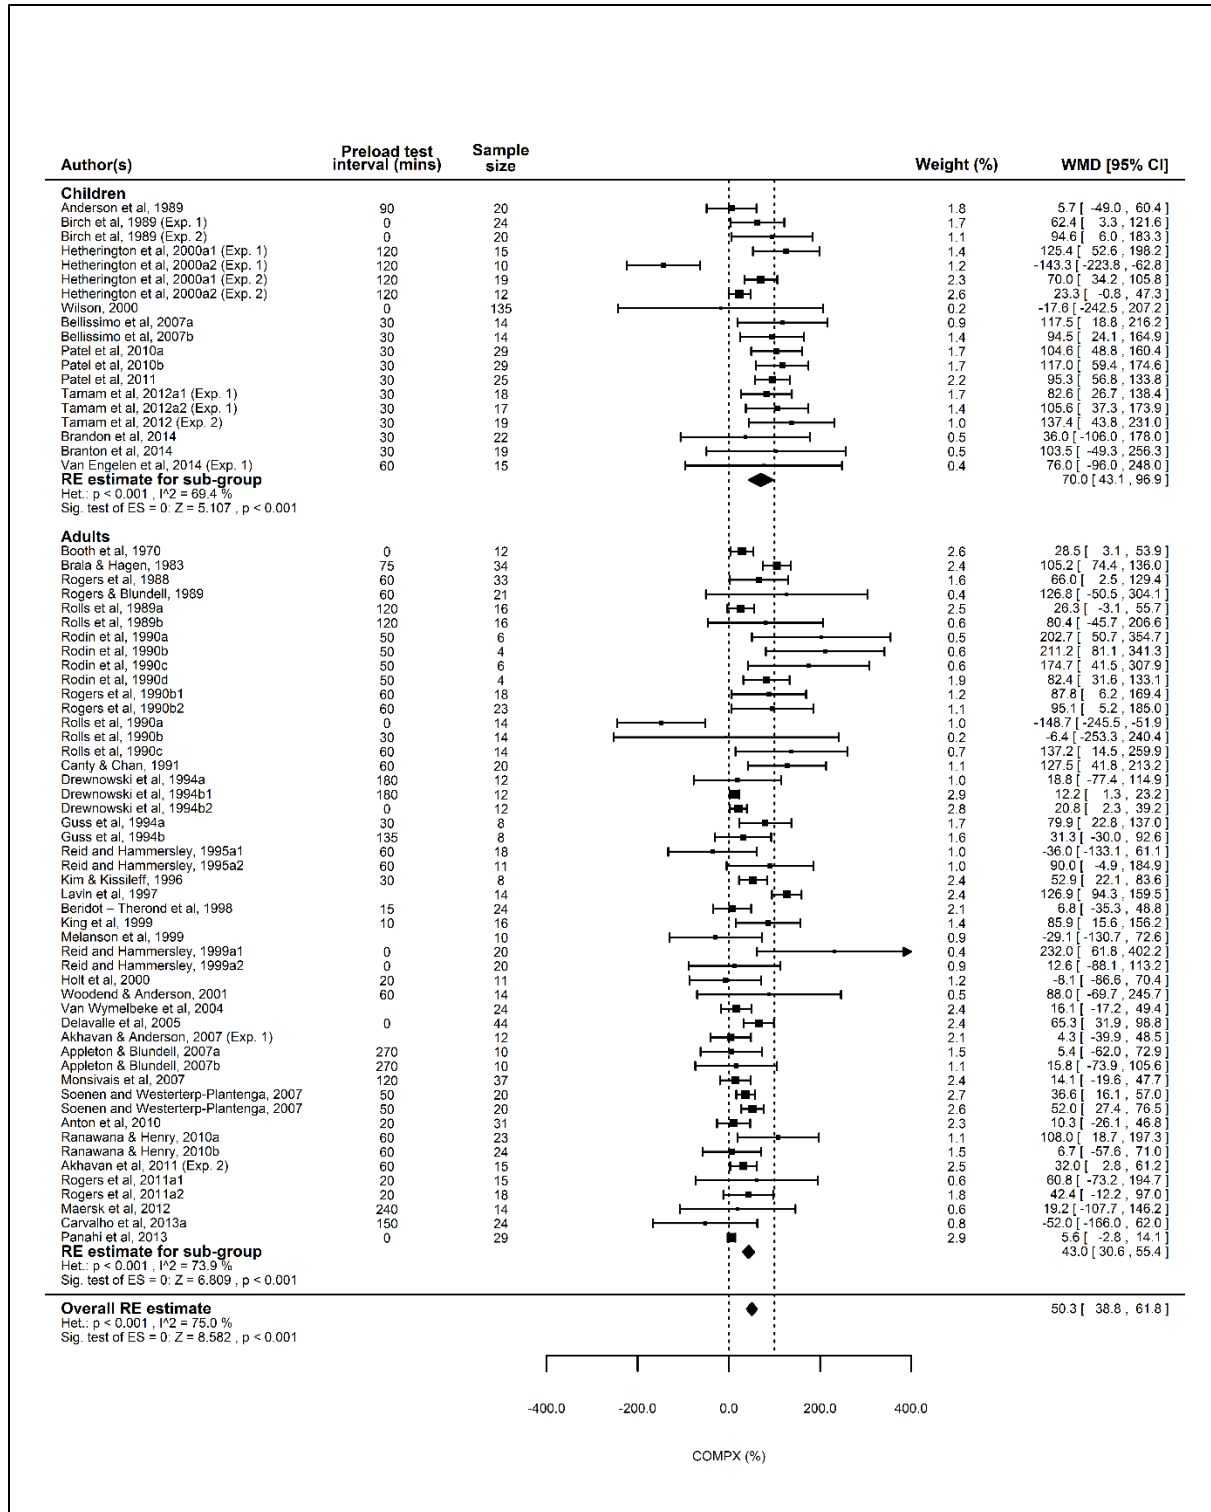

Figure S3. Forest plot of short-term intervention studies comparing the effects on COMPX of LES versus sugar in children and in adults.

COMPX is  $(\text{EI in test meal after LES} - \text{EI in test meal after sugar}) / (\text{EI from sugar preload} - \text{EI from LES preload})$  expressed as percentage. Squares represent mean COMPX for the individual comparisons; square size is proportional to the weight of each comparison; horizontal lines represent 95% CIs; filled diamonds represent the summary estimates and 95% CIs from random effects models for comparisons in children and adults separately and for all of the comparisons. The two reference lines represent no compensation (0%, i.e., the amount eaten in the test meal is the same after the LES and the sugar preloads), and full compensation (100%, i.e., the amount eaten in the test meal is greater after the LES preload than after the sugar preload and that greater amount equals the energy difference between the sugar and LES preloads).

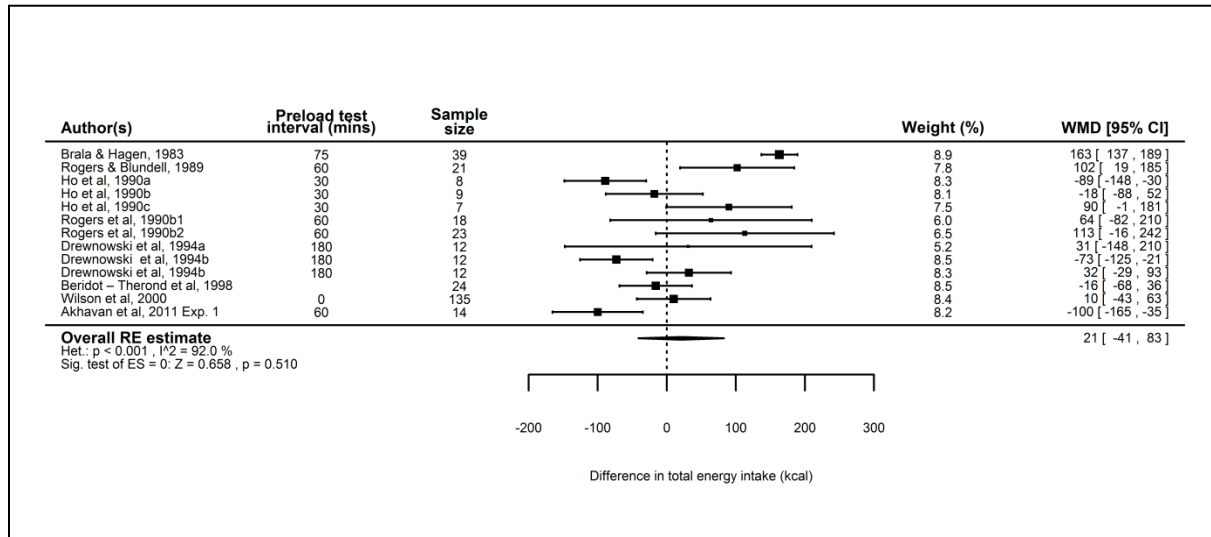

**Figure S4. Forest plot of short-term intervention studies comparing the effects on EI of LES-sweetened versus unsweetened products.**

Difference in total EI is the difference in cumulative EI (preload plus test meal) for the LES condition minus the unsweetened condition. Squares represent mean difference in EI for the individual comparisons; square size is proportional to the weight of each comparison; horizontal lines represent 95% CIs; the filled diamond represents the summary estimates and 95% CIs from random effects models for all of the comparisons.

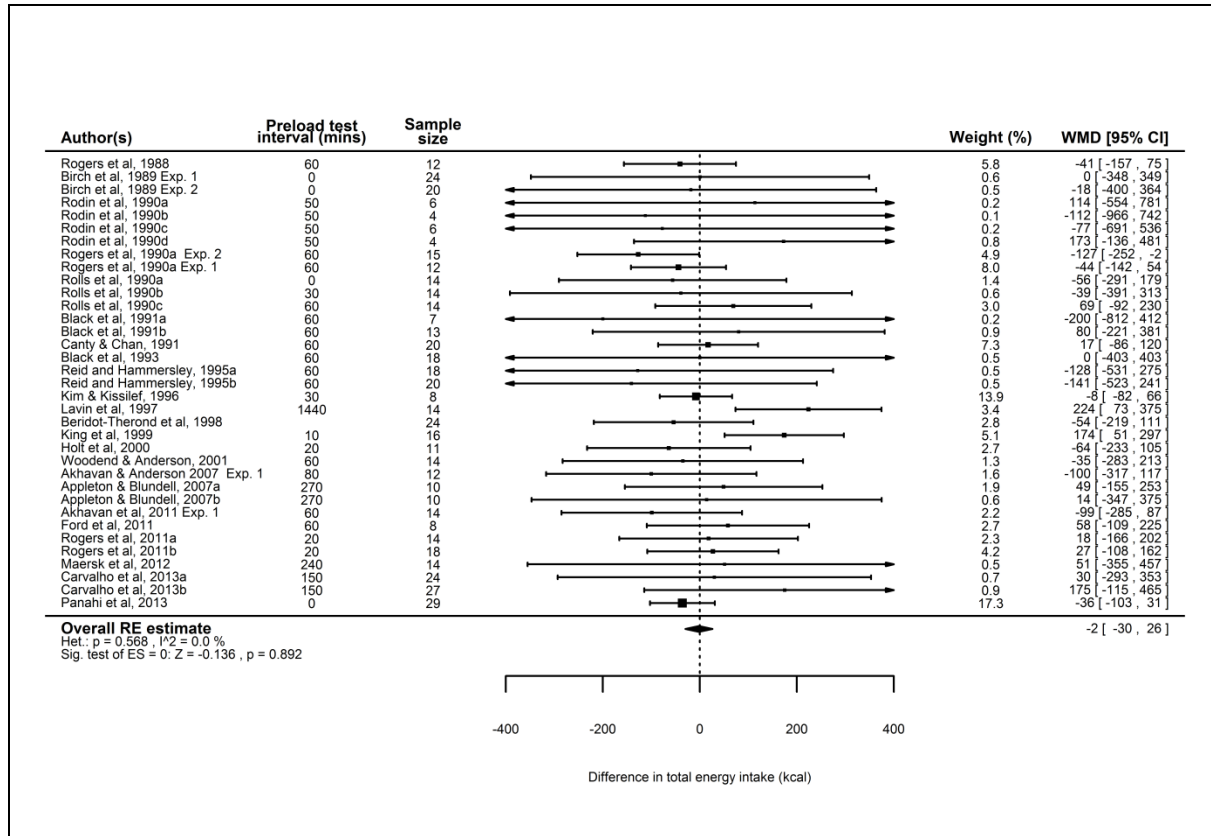

**Figure S5. Forest plot of short-term intervention studies comparing the effects on EI of LES versus water.**

Difference in total EI is the difference in cumulative EI (preload plus test meal) for the LES condition minus the water condition. Squares represent mean difference in EI for the individual comparisons; square size is proportional to the weight of each comparison; horizontal lines represent 95% CIs; the filled diamond represents the summary estimates and 95% CIs from random effects models for all of the comparisons.

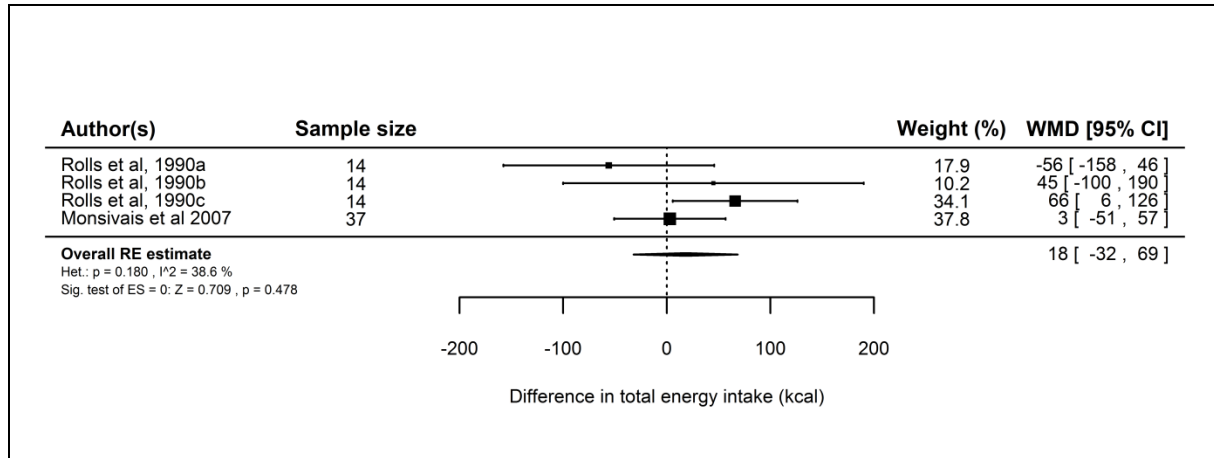

**Figure S6. Forest plot of short-term intervention studies comparing the effects on EI of LES versus nothing.**

Difference in total EI is the difference in cumulative EI (preload plus test meal) for the LES condition minus the nothing condition. Squares represent mean difference in EI for the individual comparisons; square size is proportional to the weight of each comparison; horizontal lines represent 95% CIs; the filled diamond represents the summary estimates and 95% CIs from random effects models for all of the comparisons.

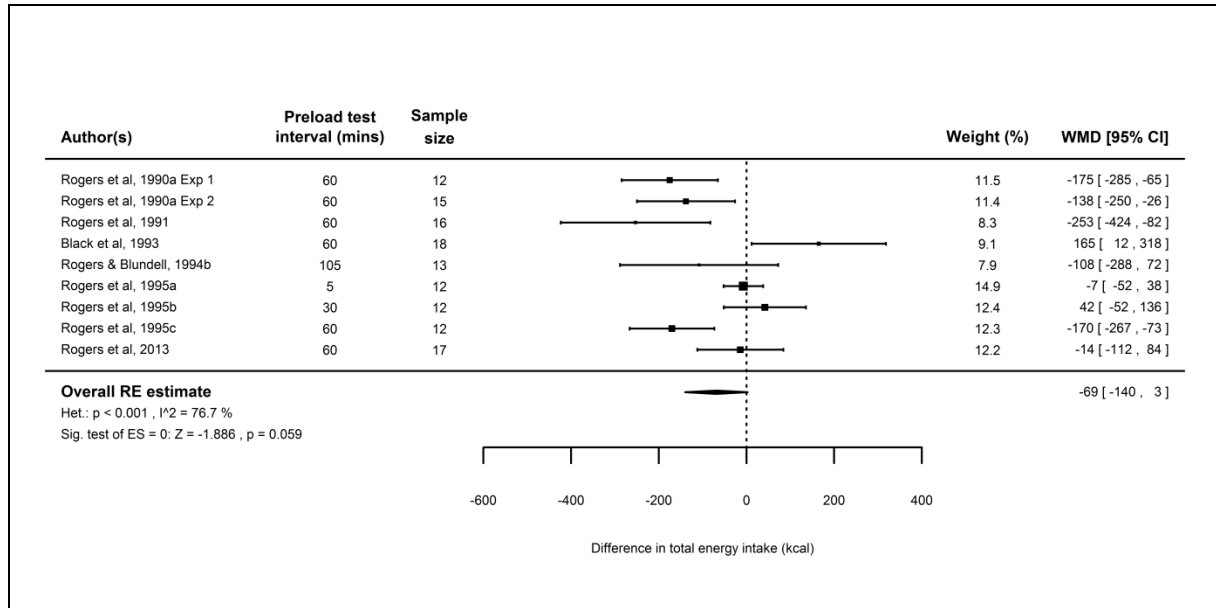

**Figure S7. Forest plot of short-term intervention studies comparing the effects on EI of LES in capsules versus placebo capsules.**

Difference in total EI is the difference in cumulative EI (preload plus test meal) for the LES condition minus the placebo condition. Squares represent mean difference in EI for the individual comparisons; square size is proportional to the weight of each comparison; horizontal lines represent 95% CIs; the filled diamond represents the summary estimates and 95% CIs from random effects models for all of the comparisons.

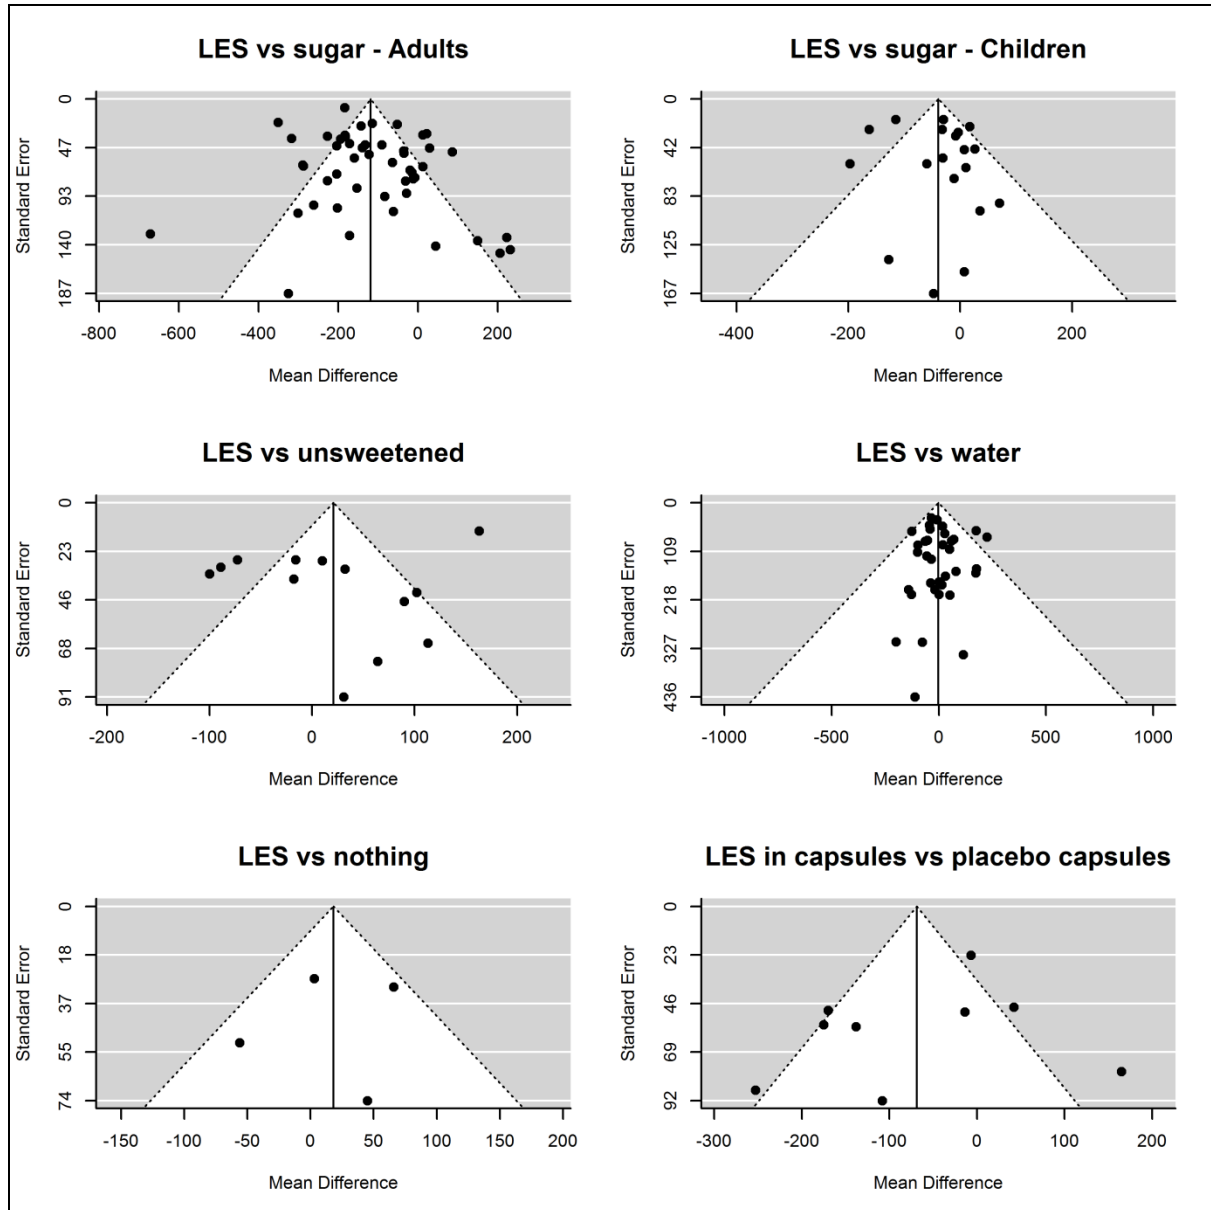

**Figure S8. Funnel plots of short-term intervention studies comparing the effects on EI of LES versus sugar (for adults and children separately).**

LES-sweetened versus unsweetened products, LES versus water, LES versus nothing and LES in capsules versus placebo capsules. Mean difference is the difference in cumulative EI (preload plus test meal) for the LES condition minus the comparison condition.

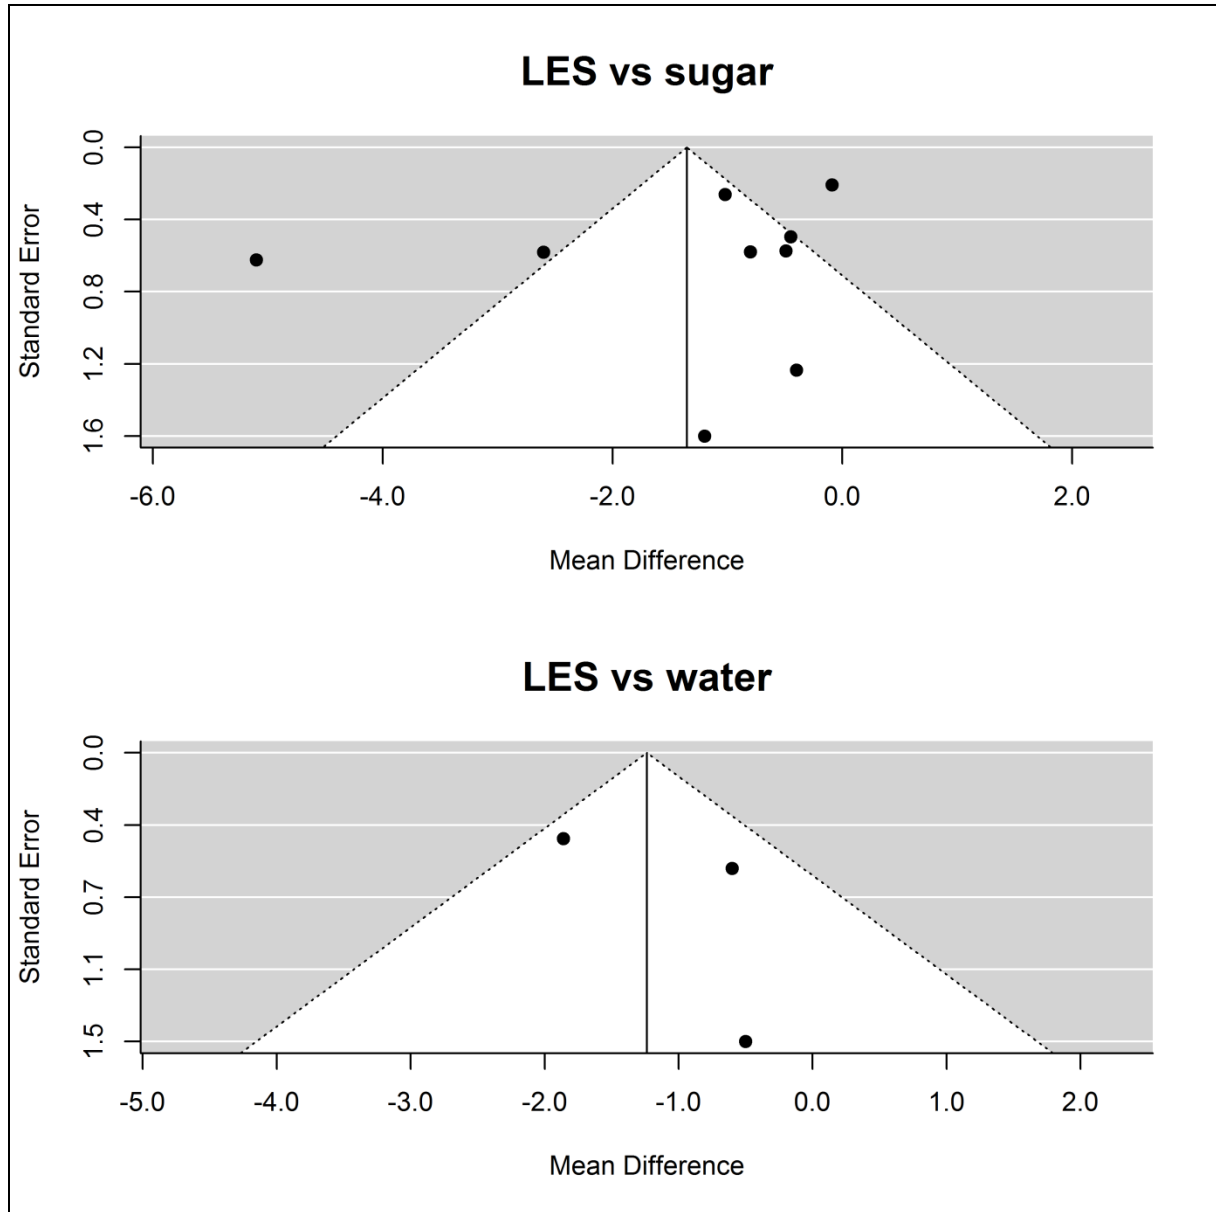

**Figure S9. Funnel plots of sustained intervention studies comparing the effects on BW of LES versus sugar and LES versus water.**

Mean difference is weight change in kg (end point minus baseline) in the LES condition minus weight change in the water condition over the intervention period.



## Reference List

1. European Commission. European Parliament and the Council of the European Union. Corrigendum to Regulation (EC) No 1924/2006 of the European Parliament and of the Council of 20 December 2006 on nutrition and health claims made on foods. *Off J Eur Union* 2006; **50**: 3-18.
2. Van Wymelbeke V, Beridot-Therond ME, de La Gueronniere V, Fantino M. Influence of repeated consumption of beverages containing sucrose or intense sweeteners on food intake. *Eur J Clin Nutr* 2004; **58**: 154-161.
3. Appleton KM, Blundell JE. Habitual high and low consumers of artificially-sweetened beverages: effects of sweet taste and energy on short-term appetite. *Physiol Behav* 2007; **92**: 479-486.
4. Beridot-Therond ME, Arts I, Fantino M, de La Gueronniere V. Short-term effects of the flavour of drinks on ingestive behaviours in man. *Appetite* 1998; **31**: 67-81.
5. Lavin JH, French SJ, Read NW. The effect of sucrose- and aspartame-sweetened drinks on energy intake, hunger and food choice of female, moderately restrained eaters. *Int J Obes Relat Metab Disord* 1997; **21**: 37-42.
6. Blackburn GL, Kanders BS, Lavin PT, Keller SD, Whatley J. The effect of aspartame as part of a multidisciplinary weight-control program on short- and long-term control of body weight. *Am J Clin Nutr* 1997; **65**: 409-418.
7. de Ruyter JC, Olthof MR, Seidell JC, Katan MB. A trial of sugar-free or sugar-sweetened beverages and body weight in children. *N Engl J Med* 2012; **367**: 1397-1406.
8. Kanders BS, Lavin PT, Kowalchuk MB, Greenberg I, Blackburn GL. An evaluation of the effect of aspartame on weight loss. *Appetite* 1988; **11**: 73-84.
9. Maersk M, Belza A, Stødkilde-Jørgensen H, Ringgaard S, Chabanova E, Thomsen H, et al. Sucrose-sweetened beverages increase fat storage in the liver, muscle, and visceral fat depot: a 6-mo randomized intervention study. *Am J Clin Nutr* 2012; **95**: 283-289.
10. Naismith DJ, Rhodes C. Adjustment in energy intake following the covert removal of sugar from the diet. *J Hum Nutr Diet* 1995; **8**: 167-175.
11. Njike VY, Faridi Z, Shuval K, Dutta S, Kay CD, West SG, et al. Effects of sugar-sweetened and sugar-free cocoa on endothelial function in overweight adults. *Int J Cardiol* 2011; **149**: 83-88.
12. Peters JC, Wyatt HR, Foster GD, Pan Z, Wojtanowski AC, Vander Veur SS, et al. The effects of water and non-nutritive sweetened beverages on weight loss during a 12-week weight loss treatment program. *Obesity* 2014; **22**: 1415-1421.

13. Raben A, Vasilaras TH, Müller AC, Astrup A. Sucrose compared with artificial sweeteners: different effects on ad libitum food intake and body weight after 10 wk of supplementation in overweight subjects. *Am J Clin Nutr* 2002; **76**: 721-729.
14. Reid M, Hammersley R, Hill AJ, Skidmore P. Long-term dietary compensation for added sugar: effects of supplementary sucrose drinks over a 4-week period. *Br J Nutr* 2007; **97**: 193-203.
15. Reid M, Hammersley R, Duffy M. Effects of sucrose drinks on macronutrient intake, body weight, and mood state in overweight women over 4 weeks. *Appetite* 2010; **55**: 130-136.
16. Tate DF, Turner-McGrievy G, Lyons E, Stevens J, Erickson K, Polzien K, *et al.* Replacing caloric beverages with water or diet beverages for weight loss in adults: main results of the Choose Healthy Options Consciously Everyday (CHOICE) randomized clinical trial. *Am J Clin Nutr* 2012; **95**: 555-563.
17. Tordoff MG, Alleva AM. Effect of drinking soda sweetened with aspartame or high-fructose corn syrup on food intake and body weight. *Am J Clin Nutr* 1990; **51**: 963-969.
18. Wolraich ML, Lindgren SD, Stumbo PJ, Stegink LD, Appelbaum MI, Kiritsy MC. Effects of diets high in sucrose or aspartame on the behavior and cognitive performance of children. *N Engl J Med* 1994; **330**: 301-307.
19. Higgins JPT, Green S. Cochrane handbook for systematic reviews of interventions Version 5.1.0 [updated March 2011]. The Cochrane Collaboration, 2011. Available at: [www.cochrane-handbook.org](http://www.cochrane-handbook.org).
20. Fowler SP, Williams K, Resendez RG, Hunt KJ, Hazuda HP, Stern MP. Fueling the obesity epidemic? Artificially sweetened beverage use and long-term weight gain. *Obesity* 2008; **16**: 1894-1900.
21. Pan A, Malik VS, Hao T, Willett WC, Mozaffarian D, Hu FB. Changes in water and beverage intake and long-term weight changes: results from three prospective cohort studies. *Int J Obes* 2013; **37**: 1378-1385.
22. Striegel-Moore RH, Thompson D, Affenito SG, Franko DL, Obarzanek E, Barton BA, *et al.* Correlates of beverage intake in adolescent girls: the National Heart, Lung, and Blood Institute Growth and Health Study. *J Pediatr* 2006; **148**: 183-187.
23. Berkey CS, Rockett HR, Field AE, Gillman MW, Colditz GA. Sugar-added beverages and adolescent weight change. *Obes Res* 2004; **12**: 778-788.
24. Laska MN, Murray DM, Lytle LA, Harnack LJ. Longitudinal associations between key dietary behaviors and weight gain over time: transitions through the adolescent years. *Obesity* 2012; **20**: 118-125.

25. Chen L, Appel LJ, Loria C, Lin PH, Champagne CM, Elmer PJ, *et al.* Reduction in consumption of sugar-sweetened beverages is associated with weight loss: the PREMIER trial. *Am J Clin Nutr* 2009; **89**: 1299-1306.
26. Duffey KJ, Steffen LM, Van Horn L, Jacobs DR, Popkin BM. Dietary patterns matter: diet beverages and cardiometabolic risks in the longitudinal Coronary Artery Risk Development in Young Adults (CARDIA) Study. *Am J Clin Nutr* 2012; **95**: 909-915.
27. Ludwig DS, Peterson KE, Gortmaker SL. Relation between consumption of sugar-sweetened drinks and childhood obesity: a prospective, observational analysis. *Lancet* 2001; **357**: 505-508.
28. Nettleton JA, Lutsey PL, Wang Y, Lima JA, Michos ED, Jacobs DR. Diet soda intake and risk of incident metabolic syndrome and type 2 diabetes in the Multi-Ethnic Study of Atherosclerosis (MESA). *Diabetes Care* 2009; **32**: 688-694.
29. Vanselow MS, Pereira MA, Neumark-Sztainer D, Raatz SK. Adolescent beverage habits and changes in weight over time: findings from Project EAT. *Am J Clin Nutr* 2009; **90**: 1489-1495.
30. Akhavan T, Anderson GH. Effects of glucose-to-fructose ratios in solutions on subjective satiety, food intake, and satiety hormones in young men. *Am J Clin Nutr* 2007; **86**: 1354-1363.
31. Hedges LV, Tipton E, Johnson MC. Robust variance estimation in meta-regression with dependent effect size estimates. *Res Synth Methods* 2010; **1**: 39-65.
32. Tanner-Smith EE, Tipton E. Robust variance estimation with dependent effect sizes: practical considerations including a software tutorial in Stata and SPSS. *Res Synth Methods* 2014; **5**: 13-30.
33. Dalderup LM, Visser W. Effects of sodium cyclamate on the growth of rats compared with other variations in the diet. *Nature* 1969; **221**.
34. Dalderup LM, Visser W. Influence of extra sucrose, fats, protein and of cyclamate in the daily food on the life-span of rats. *Experientia* 1971; **27**: 519-521.
35. Friedhoff R, Simon JA, Friedhoff AJ. Sucrose solution vs. no-calorie sweetener vs. water in weight gain. *J Am Diet Assoc* 1971; **59**: 485-486.
36. Brantom PG, Gaunt IF, Grasso P. Long-term toxicity of sodium cyclamate in mice. *Food Cosmet Toxicol* 1973; **11**: 735-746.
37. Munro IC, Moodie CA, Krewski D, Grice HC. A carcinogenicity study of commercial saccharin in the rat. *Toxicol Appl Pharmacol* 1975; **32**: 513-526.
38. Oser BL, Carson S, Cox GE, Vogin EE, Sternberg SS. Chronic toxicity study of cyclamate: saccharin (10: 1) in rats. *Toxicology* 1975; **4**: 385-386.

39. Anderson RL. Response of male rats to sodium saccharin ingestion: urine composition and mineral balance. *Food Cosmet Toxicol* 1979; **17**: 195-200.
40. Watkins AL, Williams L, Carroll C. Influence of saccharin on growth and tissue lipids in rats fed different fats and carbohydrates. *Nutr Rep Int* 1980; **21**: 329-339.
41. Ishii H, Koshimizu T, Usami S, Fujimoto T. Toxicity of aspartame and its diketopiperazine for Wistar rats by dietary administration for 104 weeks. *Toxicology* 1981; **21**: 91-94.
42. Higginbotham JD, Snodin DJ, Eaton KK, Daniel JW. Safety evaluation of thaumatin (talin protein). *Food Chem Toxicol* 1983; **21**: 815-823.
43. Schoenig GP, Goldenthal EI, Geil RG, Frith CH, Richter WR, Carlborg FW. Evaluation of the dose response and in utero exposure to saccharin in the rat. *Food Chem Toxicol* 1985; **23**: 475-490.
44. Fisher MJ, Sakata T, Tibbels TS, Smith RA, Patil K, Khachab M, *et al.* Effect of sodium saccharin and calcium saccharin on urinary parameters in rats fed Prolab 3200 or AIN-76 diet. *Food Chem Toxicol* 1989; **27**: 1-9.
45. Lina BAR, Dreef-van der Meulen H, Leegwater DC. Subchronic (13-week) oral toxicity of neohesperidin dihydrochalcone in rats. *Food Chem Toxicol* 1990; **28**: 507-513.
46. Xili L, Chengjiany B, Eryi X, Reiming S, Yuengming W, Haodong S, *et al.* Chronic oral toxicity and carcinogenicity study of stevioside in rats. *Food Chem Toxicol* 1992; **30**: 957-965.
47. Lina BAR, Bos-Kuijpers MHM, Til HP, Bär A. Chronic toxicity and carcinogenicity study of erythritol in rats. *Regul Toxicol Pharmacol* 1996; **24**: S264-S279.
48. Til HP, Modderman J. Four-week oral toxicity study with erythritol in rats. *Regul Toxicol Pharmacol* 1996; **24**: S214-S220.
49. Til HP, Kuper CF, Falke HE, Bär A. Subchronic oral toxicity studies with erythritol in mice and rats. *Regul Toxicol Pharmacol* 1996; **24**: S221-S231.
50. Bailey CJ, Day C, Knapper JM, Turner SL, Flatt PR. Antihyperglycaemic effect of saccharin in diabetic ob/ob mice. *Br J Pharmacol* 1997; **120**: 74-78.
51. Goldsmith LA. Acute and subchronic toxicity of sucralose. *Food Chem Toxicol* 2000; **38**: 53-69.
52. Beck B, Burlet A, Max JP, Stricker-Krongrad A. Effects of long-term ingestion of aspartame on hypothalamic neuropeptide Y, plasma leptin and body weight gain and composition. *Physiol Behav* 2002; **75**: 41-47.
53. Jeppesen PB, Gregersen S, Rolfsen SED, Jepsen M, Colombo M, Agger A, *et al.* Antihyperglycemic and blood pressure-reducing effects of stevioside in the diabetic Goto-Kakizaki rat. *Metabolism* 2003; **52**: 372-378.

54. Waalkens-Berendsen DH, Kuilman-Wahls MEM, Bär A. Embryotoxicity and teratogenicity study with neohesperidin dihydrochalcone in rats. *Regul Toxicol Pharmacol* 2004; **40**: 74-79.
55. Jürgens H, Haass W, Castaneda TR, Schürmann A, Koebnick C, Dombrowski F, *et al.* Consuming fructose-sweetened beverages increases body adiposity in mice. *Obes Res* 2005; **13**: 1146-1156.
56. Dyrskog SEU, Jeppesen PB, Colombo M, Abudula R, Hermansen K. Preventive effects of a soy-based diet supplemented with stevioside on the development of the metabolic syndrome and type 2 diabetes in Zucker diabetic fatty rats. *Metabolism* 2005; **54**: 1181-1188.
57. Tago K, Naito Y, Nagata T, Morimura T, Furuya M, Seki T, *et al.* A ninety-day feeding, subchronic toxicity study of oligo-N-acetylglucosamine in Fischer 344 rats. *Food Chem Toxicol* 2007; **45**: 1186-1193.
58. Bergheim I, Weber S, Vos M, Krämer S, Volynets V, Kaserouni S, *et al.* Antibiotics protect against fructose-induced hepatic lipid accumulation in mice: role of endotoxin. *J Hepatol* 2008; **48**: 983-992.
59. Curry LL, Roberts A. Subchronic toxicity of rebaudioside A. *Food Chem Toxicol* 2008; **46**: S11-S20.
60. Nikiforov AI, Eapen AK. A 90-day oral (dietary) toxicity study of rebaudioside A in Sprague-Dawley rats. *Int J Toxicol* 2008; **27**: 65-80.
61. Figlewicz DP, Ioannou G, Bennett Jay J, Kittleson S, Savard C, Roth CL. Effect of moderate intake of sweeteners on metabolic health in the rat. *Physiol Behav* 2009; **98**: 618-624.
62. Yagi K, Matsuo T. The study on long-term toxicity of D-psicose in rats. *J Clin Biochem Nutr* 2009; **45**: 271-277.
63. Park J, Cha Y-S. Stevia rebaudiana Bertoni extract supplementation improves lipid and carnitine profiles in C57BL/6J mice fed a high-fat diet. *J Sci Food Agriculture* 2010; **90**: 1099-1105.
64. Park JS, Yoo SB, Kim JY, Lee SJ, Oh SB, Kim JS, *et al.* Effects of saccharin intake on hippocampal and cortical plasticity in juvenile and adolescent rats. *Korean J Physiol Pharmacol* 2010; **14**: 113-118.
65. Geeraert B, Crombe F, Hulsmans M, Benhabiles N, Geuns JM, Holvoet P. Stevioside inhibits atherosclerosis by improving insulin signaling and antioxidant defense in obese insulin-resistant mice. *Int J Obes* 2009; **34**: 569-577.
66. Andrejic B, Mijatovic V, Calasan J, Horvat O, Samojlik I. Influence of Saccharin on Changes in Rat Pancreas and Liver Histology, Glycaemia, Food Intake and Weight. *J Comp Pathol* 2010; **143**: 344.

67. Polyák E, Gombos K, Hajnal B, Bonyár-Müller K, Szabó S, Gubicskó-Kisbenedek A, *et al.* Effects of artificial sweeteners on body weight, food and drink intake. *Acta Physiol Hung* 2010; **97**: 401-407.
68. Hlywka J, Brathwaite WA, Rihner MO, Nikiforov AI, Eapen AK. A 90-day oral (dietary) toxicity study of the 2R,4R-isomer of monatin salt in Sprague-Dawley rats. *Food Chem Toxicol* 2011; **49**: 3249-3257.
69. Otabe A, Fujieda T, Masuyama T. Chronic toxicity and carcinogenicity of N-N-[3-(3-hydroxy-4-methoxyphenyl) propyl]-alpha-aspartyl]-l-phenylalanine 1-methyl ester, monohydrate (advantame) in the rat. *Food Chem Toxicol* 2011; **49**: S35-S48.
70. Otabe A, Fujieda T, Masuyama T. A two-generation reproductive toxicity study of the high-intensity sweetener advantame in CD rats. *Food Chem Toxicol* 2011; **49**: S70-S76.
71. Reis TA, Goulart P, de Oliveira RME, Oliveira Ld, de Abreu PS, Azevedo Ad. Metabolic parameters of wistar rats subjected to diet supplemented with stevia and sugar. *Semina: Ciências Agrarias (Londrina)* 2011; **32**: 1477-1488.
72. Brathwaite WA, Casterton PL, Nikiforov AI, Rihner MO, Slotter ED, Hlywka JJ. A dietary embryo/fetal developmental toxicity study of arruva, an R,R-monatin salt isomer, in Crl: CD (SD) rats. *Food Chem Toxicol* 2013; **62**: 68-75.
73. Nikiforov AI, Rihner MO, Eapen AK, Thomas JA. Metabolism and Toxicity Studies Supporting the Safety of Rebaudioside D. *Int J Toxicol* 2013; **32**: 261-273.
74. Mitsutomi K, Masaki T, Shimasaki T, Gotoh K, Chiba S, Kakuma T, *et al.* Effects of a nonnutritive sweetener on body adiposity and energy metabolism in mice with diet-induced obesity. *Metabolism* 2014; **63**: 69-78.
75. Fulop I, Bobes D, Croitoru D, Barbu C. influence of sugars and sweeteners on mouse body weight, stress-induced body weight changes and life expectancy. *Farmacia* 2014; **62**: 376-389.
76. Abu-Taweel GM, Zyadah MA, Ajarem JS, Ahmad M. Cognitive and biochemical effects of monosodium glutamate and aspartame, administered individually and in combination in male albino mice. *Neurotoxicol Teratol* 2014; **42**: 60-67.
77. Palmnas MS, Cowan TE, Bomhof MR, Su J, Reimer RA, Vogel HJ, *et al.* Low-dose aspartame consumption differentially affects gut microbiota-host metabolic interactions in the diet-induced obese rat. *PLoS one* 2014; **9**: e109841.
78. Porikos KP, Koopmans HS. The effect of non-nutritive sweeteners on body weight in rats. *Appetite* 1988; **11**: 12-15.
79. Ramirez I. Stimulation of energy intake and growth by saccharin in rats. *J Nutr* 1990; **120**: 123-133.

80. Kanarek RB, White ES, Biegen MT, Marks-Kaufman R. Dietary influences on morphine-induced analgesia in rats. *Pharmacol Biochem Behav* 1991; **38**: 681-684.
81. D'Anci KE, Kanarek RB, Marks-Kaufman R. Beyond sweet taste: saccharin, sucrose, and polyose differ in their effects upon morphine-induced analgesia. *Pharmacol Biochem Behav* 1997; **56**: 341-345.
82. Kanarek RB, Przypek J, D'Anci KE, Marks-Kaufman R. Dietary modulation of mu and kappa opioid receptor-mediated analgesia. *Pharmacol Biochem Behav* 1997; **58**: 43-49.
83. Kanarek RB, Mathes WF, Heisler LK, Lima RP, Monfared LS. Prior exposure to palatable solutions enhances the effects of naltrexone on food intake in rats. *Pharmacol Biochem Behav* 1997; **57**: 377-381.
84. Yeomans MR, Clifton PG. Exposure to Sweetened Solutions Enhances the Anorectic Effect of Naloxone But Not d-Fenfluramine. *Physiol Behav* 1997; **62**: 255-262.
85. D'Anci KE. Tolerance to morphine-induced antinociception is decreased by chronic sucrose or polyose intake. *Pharmacol Biochem Behav* 1999; **63**: 1-11.
86. Kanarek RB, Homoleski B. Modulation of morphine-induced antinociception by palatable solutions in male and female rats. *Pharmacol Biochem Behav* 2000; **66**: 653-659.
87. Feijó FdM, Ballard CR, Foletto KC, Batista BAM, Neves AM, Ribeiro MFM, *et al.* Saccharin and aspartame, compared with sucrose, induce greater weight gain in adult Wistar rats, at similar total caloric intake levels. *Appetite* 2013; **60**: 203-207.
88. Swithers SE, Davidson TL. A role for sweet taste: calorie predictive relations in energy regulation by rats. *Behav Neurosci* 2008; **122**: 161-173.
89. Swithers SE, Baker CR, Davidson TL. General and persistent effects of high-intensity sweeteners on body weight gain and caloric compensation in rats. *Behav Neurosci* 2009; **123**: 772-780.
90. Swithers SE, Martin AA, Clark KM, Laboy AF, Davidson TL. Body weight gain in rats consuming sweetened liquids. Effects of caffeine and diet composition. *Appetite* 2010; **55**: 528-533.
91. Davidson TL, Martin AA, Clark K, Swithers SE. Intake of high-intensity sweeteners alters the ability of sweet taste to signal caloric consequences: implications for the learned control of energy and body weight regulation. *Q J Exp Psychol* 2011; **64**: 1430-1441.
92. Swithers SE, Laboy AF, Clark K, Cooper S, Davidson TL. Experience with the high-intensity sweetener saccharin impairs glucose homeostasis and GLP-1 release in rats. *Behav Brain Res* 2012; **233**: 1-14.
93. Swithers SE. Artificial sweeteners produce the counterintuitive effect of inducing metabolic derangements. *Trends Endocrinol Metab* 2013; **24**: 431-441.

94. Swithers SE, Sample CH, Katz DP. Influence of ovarian and non-ovarian estrogens on weight gain in response to disruption of sweet taste-calorie relations in female rats. *Horm Behav* 2013; **63**: 40-48.
95. Anderson GH, Saravis S, Schacher R, Zlotkin S, Leiter LA. Aspartame: effect on lunch-time food intake, appetite and hedonic response in children. *Appetite* 1989; **13**: 93-103.
96. Birch LL, McPhee L, Sullivan S. Children's food intake following drinks sweetened with sucrose or aspartame: time course effects. *Physiol Behav* 1989; **45**: 387-395.
97. Gheller B, Akhavan T, Pollard D, Gladanac B, Constantino M, Luhovyy B, et al. A pre-meal glucose drink, but not video game playing, suppresses food intake in overweight and obese boys (1040.8). *FASEB J* 2014; **28**: 1040-1048.
98. Branton A, Akhavan T, Gladanac B, Pollard D, Welch J, Rossiter M, et al. Pre-meal video game playing and a glucose preload suppress food intake in normal weight boys. *Appetite* 2014; **83**: 256-262.
99. Van Engelen M, Khodabandeh S, Akhavan T, Agarwal J, Gladanac B, Bellissimo N. Effect of sugars in solutions on subjective appetite and short-term food intake in 9-to 14-year-old normal weight boys. *Eur J Clin Nutr* 2014; **68**: 773-777.
100. Hetherington MM, Wood C, Lyburn SC. Response to energy dilution in the short term: evidence of nutritional wisdom in young children? *Nutr Neurosci* 2000; **3**: 321-329.
101. Wilson JF. Lunch eating behavior of preschool children: effects of age, gender, and type of beverage served. *Physi Behav* 2000; **70**: 27-33.
102. Bellissimo N, Pencharz PB, Thomas SG, Anderson GH. Effect of television viewing at mealtime on food intake after a glucose preload in boys. *Pediatr Res* 2007; **61**: 745-749.
103. Bellissimo N, Thomas SG, Goode RC, Anderson GH. Effect of short-duration physical activity and ventilation threshold on subjective appetite and short-term energy intake in boys. *Appetite* 2007; **49**: 644-651.
104. Patel BP, Bellissimo N, Thomas SG, Hamilton JK, Anderson GH. Television viewing at mealtime reduces caloric compensation in peripubertal, but not postpubertal, girls. *Pediatr Res* 2011; **70**: 513-517.
105. Tamam S, Bellissimo N, Patel BP, Thomas SG, Anderson GH. Overweight and obese boys reduce food intake in response to a glucose drink but fail to increase intake in response to exercise of short duration. *Appl Physiol Nutr Metab* 2012; **37**: 520-529.
106. Booth DCA, Chase AILE. Temporal bounds of post-ingestive glucose induced satiety in man. *Nature* 1970; **228**: 1104-1105.
107. Brala PM, Hagen RL. Effects of sweetness perception and caloric value of a preload on short term intake. *Physiol Behav* 1983; **30**: 1-9.



108. Rogers PJ, Carlyle JA, Hill AJ, Blundell JE. Uncoupling sweet taste and calories: comparison of the effects of glucose and three intense sweeteners on hunger and food intake. *Physiol Behav* 1988; **43**: 547-552.
109. Rogers PJ, Blundell JE. Separating the actions of sweetness and calories: effects of saccharin and carbohydrates on hunger and food intake in human subjects. *Physiol Behav* 1989; **45**: 1093-1099.
110. Rolls BJ, Laster LJ, Summerfelt A. Hunger and food intake following consumption of low-calorie foods. *Appetite* 1989; **13**: 115-127.
111. Rodin J. Comparative effects of fructose, aspartame, glucose, and water preloads on calorie and macronutrient intake. *Am J Clin Nutr* 1990; **51**: 428-435.
112. Rogers PJ, Lambert TC, Alikanizadeh LA, Blundell JE. Intense sweeteners and appetite: responses of informed and uninformed subjects consuming food sweetened with aspartame or sugar. *Int J Obes* 1990; **14**: 105.
113. Rolls BJ, Kim S, Fedoroff IC. Effects of drinks sweetened with sucrose or aspartame on hunger, thirst and food intake in men. *Physiol Behav* 1990; **48**: 19-26.
114. Canty DJ, Chan MM. Effects of consumption of caloric vs noncaloric sweet drinks on indices of hunger and food consumption in normal adults. *Am J Clin Nutr* 1991; **53**: 1159-1164.
115. Drewnowski A, Massien C, Louis-Sylvestre J, Fricker J, Chapelot D, Apfelbaum M. The effects of aspartame versus sucrose on motivational ratings, taste preferences, and energy intakes in obese and lean women. *Int J Obes Relat Metab Disord* 1994; **18**: 570-578.
116. Drewnowski A, Massien C, Louis-Sylvestre J, Fricker J, Chapelot D, Apfelbaum M. Comparing the effects of aspartame and sucrose on motivational ratings, taste preferences, and energy intakes in humans. *Am J Clin Nutr* 1994; **59**: 338-345.
117. Guss JL, Kissileff HR, Pi-Sunyer FX. Effects of glucose and fructose solutions on food intake and gastric emptying in nonobese women. *Am J Physiol-Regul Integr Comp Physiol* 1994; **36**: R1537.
118. Reid M, Hammersley R. Effects of carbohydrate intake on subsequent food intake and mood state. *Physiol Behav* 1995; **58**: 421-427.
119. Kim JY, Kissileff HR. The effect of social setting on response to a preloading manipulation in non-obese women and men. *Appetite* 1996; **27**: 25-40.
120. King NA, Appleton K, Rogers PJ, Blundell JE. Effects of sweetness and energy in drinks on food intake following exercise. *Physiol Behav* 1999; **66**: 375-379.
121. Melanson KJ, Westerterp-Plantenga MS, Campfield AL, Saris WH. Blood glucose and meal patterns in time-blinded males, after aspartame, carbohydrate, and fat consumption, in relation to sweetness perception. *Br J Nutr* 1999; **82**: 437-446.

122. Reid M, Hammersley R. The effects of sucrose and maize oil on subsequent food intake and mood. *Br J Nutr* 1999; **82**: 447-455.
123. Holt NS. The effects of sugar-free vs sugar-rich beverages on feelings of fullness and subsequent food intake. *Int J Food Sci Nutr* 2000; **51**: 59-71.
124. Woodend DM, Anderson GH. Effect of sucrose and safflower oil preloads on short term appetite and food intake of young men. *Appetite* 2001; **37**: 185-195.
125. DellaValle DM, Roe LS, Rolls BJ. Does the consumption of caloric and non-caloric beverages with a meal affect energy intake? *Appetite* 2005; **44**: 187-193.
126. Monsivais P, Perrigue MM, Drewnowski A. Sugars and satiety: does the type of sweetener make a difference? *Am J Clin Nutr* 2007; **86**: 116-123.
127. Soenen S, Westerterp-Plantenga MS. No differences in satiety or energy intake after high-fructose corn syrup, sucrose, or milk preloads. *Am J Clin Nutr* 2007; **86**: 1586-1594.
128. Anton SD, Martin CK, Han H, Coulon S, Cefalu WT, Geiselman P, *et al.* Effects of stevia, aspartame, and sucrose on food intake, satiety, and postprandial glucose and insulin levels. *Appetite* 2010; **55**: 37-43.
129. Ranawana DV, Henry CJK. Are caloric beverages compensated for in the short-term by young adults? An investigation with particular focus on gender differences. *Appetite* 2010; **55**: 137-146.
130. Akhavan T, Luhovyy BL, Anderson GH. Effect of drinking compared with eating sugars or whey protein on short-term appetite and food intake. *Int J Obesity* 2010; **35**: 562-569.
131. Rogers PJ, Gadah NS, Kyle LA, Brunstrom JM. Standard preload-test meal study designs may underestimate satiety effects: sugar containing drinks as an example. *Proc Nutr Soc* 2011; **70**: E401.
132. Maersk M, Belza A, Holst JJ, Fenger-Grøn M, Pedersen SB, Astrup A, *et al.* Satiety scores and satiety hormone response after sucrose-sweetened soft drink compared with isocaloric semi-skimmed milk and with non-caloric soft drink: a controlled trial. *Eur J Clin Nutr* 2012; **66**: 523-529.
133. Carvalho P, Sousa M, Barros R, Padrao P, Moreira P, Teixeira V. Impact of morning ingestion of sugary and sweetened beverages on energy and fluid intake throughout day. *Ann Nutr Metab* 2013; **63**: 1448-1449.
134. Panahi S, El Khoury D, Luhovyy BL, Goff HD, Anderson GH. Caloric beverages consumed freely at meal-time add calories to an ad libitum meal. *Appetite* 2013; **65**: 75-82.
135. Ho EE, Liszt AF, Pudiel V. The effects of energy content and sweet taste on food consumption in restrained and non-restrained eaters. *J Am Diet Assoc* 1990; **90**: 1223-8

136. Rogers PJ. Why a palatability construct is needed. *Appetite* 1990; **14**: 167-170.
137. Black RM, Tanaka P, Leiter LA, Anderson GH. Soft drinks with aspartame: effect on subjective hunger, food selection, and food intake of young adult males. *Physiol Behav* 1991; **49**: 803-810.
138. Black RM, Leiter LA, Anderson GH. Consuming aspartame with and without taste: differential effects on appetite and food intake of young adult males. *Physiol Behav* 1993; **53**: 459-466.
139. Ford HE, Peters V, Martin NM, Sleeth ML, Ghatei MA, Frost GS, *et al.* Effects of oral ingestion of sucralose on gut hormone response and appetite in healthy normal-weight subjects. *Eur J Clin Nutr* 2011; **65**: 508-513.
140. Rogers PJ, Blundell JE. Reanalysis of the effects of phenylalanine, alanine, and aspartame on food intake in human subjects. *Physiol Behav* 1994; **56**: 247-250.
141. Rogers PJ, Burley VJ, Alikhanizadeh LA, Blundell JE. Postingestive inhibition of food intake by aspartame: importance of interval between aspartame administration and subsequent eating. *Physiol Behav* 1995; **57**: 489-493.
142. Rogers PJ. What is the mechanism for the postingestive anorectic effect of aspartame? *Appetite* 2013; **71**: 485.
143. Raben A, Richelsen B. Artificial sweeteners: a place in the field of functional foods? Focus on obesity and related metabolic disorders. *Curr Opin Clin Nutr Metab Care* 2012; **15**: 597-604.
144. Miller P, Perez V. Low-calorie sweeteners and body weight and composition: a meta-analysis of randomized controlled trials and prospective cohorts (391.1). *FASEB J* 2014; **28**: 391.
145. Colditz GA, Willett WC, Stampfer MJ, London SJ, Segal MR, Speizer FE. Patterns of weight change and their relation to diet in a cohort of healthy women. *Am J Clin Nutr* 1990; **51**: 1100-1105.
146. Johnson L, Mander AP, Jones LR, Emmett PM, Jebb SA. Is sugar-sweetened beverage consumption associated with increased fatness in children? *Nutrition* 2007; **23**: 557-563.
147. Newby PK, Tucker KL. Empirically derived eating patterns using factor or cluster analysis: a review. *Nutr Rev* 2004; **62**: 177-203.
148. Parker DR, Gonzalez S, Derby CA, Gans KM, Lasater TM, Carleton RA. Dietary factors in relation to weight change among men and women from two southeastern New England communities. *Int J Obes Relat Metab Disord* 1997; **21**: 103-109.
149. Schulze MB, Manson JE, Ludwig DS, Colditz GA, Stampfer MJ, Willett WC, *et al.* Sugar-sweetened beverages, weight gain, and incidence of type 2 diabetes in young and middle-aged women. *JAMA* 2004; **292**: 927-934.

150. Knopp RH, Brandt K, Arky RA. Effects of aspartame in young persons during weight reduction. *J Toxic Environ Health A* 1976; **2**: 417-428.
151. Gatenby SJ, Aaron JI, Jack VA, Mela DJ. Extended use of foods modified in fat and sugar content: nutritional implications in a free-living female population. *Am J Clin Nutr* 1997; **65**: 1867-1873.
152. Gostner A, Schäffer V, Theis S, Menzel T, Lühns H, Melcher R, *et al.* Effects of isomalt consumption on gastrointestinal and metabolic parameters in healthy volunteers. *Br J Nutr* 2005; **94**: 575-581.
153. Ebbeling CB, Feldman HA, Osganian SK, Chomitz VR, Ellenbogen SJ, Ludwig DS. Effects of decreasing sugar-sweetened beverage consumption on body weight in adolescents: a randomized, controlled pilot study. *Pediatrics* 2006; **117**: 673-680.
154. Ebbeling CB, Feldman HA, Chomitz VR, Antonelli TA, Gortmaker SL, Osganian SK, *et al.* A randomized trial of sugar-sweetened beverages and adolescent body weight. *N Engl J Med* 2012; **367**: 1407-1416.
